# Supplementary material
Source: PubMed Central journal article supplement (PMC9544381)
Supplement: NPH-234-295-s002.pdf [file NPH-234-295-s002.pdf]

## ***New Phytologist* Supporting Information**

Article title: **Genomes shed light on the evolution of *Begonia*, a mega-diverse genus**

Authors: Lingfei Li, Xiaoli Chen, Dongming Fang, Shanshan Dong, Xing Guo, Na Li, Lucia Campos-Dominguez, Wenguang Wang, Yang Liu, Xiaoan Lang, Yang Peng, Daike Tian, Daniel C. Thomas, Weixue Mu, Min Liu, Chenyu Wu, Ting Yang, Suzhou Zhang, Leilei Yang, Jianfen Yang, Zhong-Jian Liu, Liangsheng Zhang, Xingtian Zhang, Fei Chen, Yuannian Jiao, Yalong Guo, Mark Hughes, Wei Wang, Xiaofei Liu, Chunmei Zhong, Airong Li, Sunil Kumar Sahu, Huanming Yang, Ernest Wu, Joel Sharbrough, Michael Lisby, Xin Liu, Xun Xu, Douglas E. Soltis, Yves Van de Peer, Catherine Kidner, Shouzhou Zhang, Huan Liu

Article acceptance date: 20 December 2021

The following Supporting Information is available for this article:

### **Methods S1:** Supplemental methods

- Cytology
- 10× Genomics Chromium™ Genome library preparation
- Hi-C library preparation
- SMART library preparation
- Raw data processing and estimation of genome size
- Genome assembly
- Assessment of assembly completeness
- Genome annotation
- Genome evolution
- Principal component analysis (PCA) analysis of TE diversity
- Plastome assembly
- Genetic variation and admixture pattern
- Identification of orthologs of the light regulatory network
- Transcriptome analysis of light/dark-responsive genes

**Fig. S1** Current WGS samplings of *Begonia* accessions (78 individuals in 37 sections, as marked in red) on the sectional level *Begonia* phylogeny by Moonlight, *et al* (2018).

**Fig. S2** Somatic chromosome counts at metaphase in the four sequenced *Begonia* species.

**Fig. S3** K-mer analyses of the four *Begonia* species.

**Fig. S4** Flowchart of sequencing and assembly for the four *Begonia* species.

**Fig. S5** Scaffold collinear comparisons between two different species (upper: *B. masoniana*, bottom: *B. peltatifolia*) show distinct distribution of different transposon elements.

**Fig. S6** Distribution of gene density of four *Begonia* genomes.

**Fig. S7** Analyses of post-WGD retained genes families in *Begonia*.

**Fig. S8** Analysis of post-WGD retained genes families specific to *B. loranthoides*.

**Fig. S9** Analysis of post-WGD retained genes families specific to *B. masoniana*.

**Fig. S10** Analysis of post-WGD retained genes families specific to *B. darthvaderiana*.

**Fig. S11** Analysis of post-WGD retained gene families specific to *B. peltatifolia*.

**Fig. S12** Expansion of gene families in anthocyanin pathway in *Begonia*.

**Fig. S13** Gene family expansions and contractions along a dated angiosperm phylogeny of 13 selected species.

**Fig. S14** Contraction and complete loss of the TNL subgroup of NBS family in *Begonia*.

**Fig. S15** Comparison of TE proportions in 122 shared syntenic blocks across four *Begonia* species.

**Fig. S16** Reconstruction of paleo-genome of four sequenced *Begonia* species.

**Fig. S17** Number of LTR insertions and genome sizes for 13 angiosperm species.

**Fig. S18** Number of shared full length LTR families across four *Begonia* species.

**Fig. S19** Neighbor-joining trees built from RT domain sequence similarities among different lineage-specific copies identified in *Begonia* genomes.

**Fig. S20** Comparison of nuclear ML tree and abundance clustering of TEs.

**Fig. S21** The TE landscape surrounding genes in four *Begonia* species.

**Fig. S22** Impacts of TE insertions on the structure of introns and promoters.

**Fig. S23** KEGG enrichment of genes with TE insertion either in introns or promoters.

**Fig. S24** Expansion of crychromes (CRYs) genes in *Begonia* due to WGD.

- Fig. S25** Expansion of Phototropin (PHOT) genes in *Begonia* due to WGD.
- Fig. S26** Expansion of Phytochrome (PHY) genes in *Begonia* due to WGD.
- Fig. S27** Expansion of UV Resistance Locus 8 (UVR8) genes in *Begonia* due to WGD.
- Fig. S28** Schematic diagrams show tandem duplication of LHCB1 genes in *B. masoniana* and *B. darthvaderiana*.
- Fig. S29** Nucleotide diversity ( $\pi$ ) and population divergence ( $F_{ST}$ ) across the three major groups of *Begonia*.
- Fig. S30** Maximum likelihood tree inferred from concatenated nucleotide sequences of *Begonia* plastid protein coding genes using RAxML.
- Fig. S31** Maximum likelihood tree inferred from *Begonia* plastome nucleotide alignment of 156,131 bp using RAxML.
- Fig. S32** Maximum likelihood tree inferred from a concatenated dataset of 1,604 nuclear genes using IQtree with individual gene trees mapped.
- Fig. S33** Coalescent super tree inferred with ASTRAL-III using 1,604 nuclear single gene trees.
- Fig. S34** Coalescent super tree inferred with ASTRAL-III using SNPs in 1,343 nuclear single gene trees.
- Fig. S35** Phylonet network results for three geographically delimited *Begonia* clades.
- Table S1** Summary of 78 *Begonia* species for whole genome shot gun sequencing. (See separate Excel file)
- Table S2** Genome size estimation based on K-mer analysis.
- Table S3** Summary of within-genome heterozygosity of the four *Begonia* species.
- Table S4** Statistics of genome assemblies.
- Table S5** Global statistics of genome assembly and annotation of four *Begonia* species.
- Table S6** Statistics of raw data for whole genome sequencing and RNA-seq.
- Table S7** Statistics of reads mapping to genome sequences for RNA-seq data from different tissues for four *Begonia* species.
- Table S8** Repetitive elements in four *Begonia* genomes. (See separate Excel file)
- Table S9** Summary of genomes information across 13 representative angiosperms. (See separate Excel file)
- Table S10** Gene Ontology (GO) terms enrichment analysis of the expanded gene

families of *Begonia*.

**Table S11** Kyoto Encyclopedia of Genes and Genomes (KEGG) enrichment analysis of the expanded gene families of *Begonia*.

**Table S12** Number of genes in families related to defense in *Begonia* and other selected genomes.

**Table S13** Statistics and annotations of the contracted gene families in *Begonia*. (See separate Excel file)

**Table S14** The significantly enriched GO terms of biological processes for genes with TE inserting in introns across four *Begonia* species.

**Table S15** The significantly enriched GO terms of biological processes for genes with TEs inserting in promoter across four *Begonia* species.

**Table S16** Chlorophyll data of the sun loving plant *Gerbera hybrida* and four *Begonia* species.

**Table S17** Comparisons of the gene numbers for the light signaling genes in 10 angiosperm genomes.

**Table S18** Comparisons of the gene numbers of the light-harvesting chlorophyll a/b-binding proteins (LHCs) family genes in the seven genomes of *Begonia* and other angiosperms.

## **Methods S1** Supplemental methods.

### ***Cytology***

Young root tips of the four *Begonia* species were collected at 8:00~10am, immediately pretreated for 4 hr with 0.1% colchicine solution at 4°C, and fixed overnight in ethanol: acetic acid (3:1) at 4°C. The root tips were then dissected on a microscope slide in a drop of 10% hydrochloric acid for 2 min at 60°C. Chromosomes were stained with carbolfuchsin (Solarbio, Beijing, China), and inspected under a microscope (Nikon, Japan). The chromosome numbers were counted and confirmed by at least three cells.

### ***10×Genomics Chromium<sup>TM</sup> Genome library preparation***

High molecular weight (HMW) DNA was isolated using IrysPrep® Plant Tissue DNA Isolation kit following the manufacturer's instructions and assayed by pulsed field gel electrophoresis. For preparation of the Chromium library, the HMW DNA was quantitated and ~1 ng DNA was denatured according to the manufacturer's recommendations (Chromium Genome Chip Kit v1, PN-120229, 10×Genomics, Pleasanton, USA). The denatured DNA was spiked into the reaction master mix, and mixed with gel beads and emulsification oil to generate droplets within a Chromium Genome Chip. Then we finished the rest steps of Chromium library preparation following the manufacturer's protocols, with one modified PCR primer to introduce a 5' phosphorylation site on one amplifying strand. After PCR, the standard circularization step for BGISEQ-500 was carried out and DNA nanoballs (DNB) were prepared as previously described (Drmanac *et al.*, 2010).

### ***Hi-C library preparation***

Leaf sample was ground to fine powder in liquid nitrogen and fixed in 1% formaldehyde. After termination of the reaction with glycine, the formaldehyde fixed powder was re-suspended in nuclei isolation buffer (10 mM Tris-HCl pH 8.0 (Sigma, St. Louis, America), 10 mM NaCl (Beyotime, Shanghai, China), 1×PMSF (Sigma, St. Louis, America)). The restriction enzyme (Mbo I) (NEB, Ipswich, America) was added to digest the DNA, followed by the 5' overhang repair (10 mM dCTP, 10 mM dGTP, 10 mM dTTP, (Invitrogen, Waltham, America) 5 U/μl DNA Polymerase I, Large (Klenow) Fragment (NEB, Ipswich, America)) with a biotinylated residue (0.4

mM biotin-14-dATP (Invitrogen, Waltham, America)). The resultant blunt-end fragments were ligated *in situ* (10× NEB T4 DNA ligase buffer (NEB, Ipswich, America), 10% Triton X-100 (Sigma, St. Louis, America), 10 mg/ml BSA (NEB, Ipswich, America), T4 DNA ligase (NEB, Ipswich, America)). Then the isolated DNA was reverse-crosslinked (add 10 mg/ml proteinase K (NEB, Ipswich, America) and 1% SDS (Ambion, Waltham, America) to the tube and incubate at 56°C for overnight) and purified (put the reverse-crosslinked DNA liquid into three tube equally, add 1.5× volumes of AMPure XP (Agencourt, Brea, America) mixture to each tube, vortex and spin down briefly, incubate for 10 min at room temperature, place on the MPS (Invitrogen, Waltham, America) for 5 min, discard supernatant, wash the beads twice with 1 ml of freshly made 70% ethanol (Sinopharm, Shanghai, China), air-dry the beads completely and re-suspend the beads in 30 µl of ddH<sub>2</sub>O). The Hi-C library was generated by shearing 20 µg of DNA and capturing the biotin-containing fragments with streptavidin-coated beads using Dynabeads MyOne Streptavidin T1 (Invitrogen, Waltham, America). DNA fragment end repair (10× NEB T4 DNA ligase buffer with 10 mM ATP (NEB, Ipswich, America), 25 mM dNTP mix (Enzymatics, Beverly, America), 10 U/µl NEB T4 PNK (NEB, Ipswich, America), 3 U/µl NEB T4 DNA polymerase I (NEB, Ipswich, America), 5 U/µl NEB DNA polymerase I, Large (Klenow) Fragment (NEB, Ipswich, America)), adenylation (10× NEBuffer 2 (NEB, Ipswich, America), 10 mM dATP (Invitrogen, Waltham, America), 5 U/µl NEB Klenow exo minus (NEB, Ipswich, America)), and adaptor ligation were performed using 10× T4 PNK Reaction Buffer (NEB, Ipswich, America), 100 mM ATP (Fermentas, America), 600 U/ul T4 DNA Ligase (NEB, Ipswich, America), 50% PEG8000 ( Rigaku, Tokyo, Japan), 50 µM Ad153 barcode oligo\_2B mix (BGI, Shenzhen, China), and followed by PCR (95°C 3 min; [98°C 20 sec., 60°C 15 sec., 72°C 15 sec.] × 8 cycles; 72°C 10 min). After PCR, the standard circularization step required for BGISEQ-500 was carried out and DNB were prepared as previously described (Drmanac *et al.*, 2010).

### ***SMART library preparation***

Ten to 15 µg gDNA was sheared using Covaris G-Tubes for 10 min at 1,350 g using centrifuge (Beckman, USA). The sheared DNA was concentrated and cleaned using 0.45× Ampure XP beads (Beckman Coulter, Brea, USA). Pacific Biosciences Single

Molecule Real Time (SMRT) bell library was prepared following the protocol (P/N 100-286-000-5) provided by Pacific Biosciences ([www.pacb.com](http://www.pacb.com)) using the SMRTbell Template Prep kit 1.0 (P/N 100-259-100). The resultant SMRTbell libraries were size selected using BluePippin (Sage Science) according to the manufacturer's instructions. The cut-off limit was set to 15-50 kb to select SMRTbell library molecules with an average size of 20 kb or larger. The Pacific Biosciences Binding and Annealing calculator was used to determine the appropriate concentrations for the annealing and binding of the SMRTbell libraries. The libraries were annealed and bound to the P6 DNA polymerase for sequencing using the DNA/Polymerase Binding Kit P6 v2.0 (P/N100-372-700). The only deviation from standard protocol was the extension of binding time from 30 min to 1-3 hr. The bound SMRTbell libraries were loaded onto the SMRT cells using the standard MagBead protocol, and the MagBead Buffer Kit v2.0 (P/N 100—642-800). The standard MagBead sequencing protocol used the DNA Sequencing Kit 4.0 v2 (P/N 100-612-400) with P6/C4 reagents. Sequencing data were collected for 6 hr movie times and Stage Start was enabled to capture the longest single reads possible on the PacBio Sequel instrument. Finally, 45.38 and 48.23 Gb data of 3.57 and 4.35 Mb long PacBio reads from *B. masoniana* and *B. darthvaderiana* sequencing libraries were obtained (Table S6), respectively, with more than 84.45% and 80.32% sequencing data longer than 10 kb for the two. With an estimated genome size of ~800 Mb, the data used for contig construction covered  $56.73 \times$  and  $60.29 \times$  of each genome of *B. masoniana* and *B. darthvaderiana*.

### ***Raw data processing and estimation of genome size***

For 10× Genomics and stLFR libraries, raw reads with ambiguous Ns ratio over 5% and low-quality base (quality score less than 10) ratio exceeding 20% were removed using SOAPnuke (v1.5.6) (Chen *et al.*, 2018) with parameters 'filter -l 10 -q 0.2 -n 0.05 -Q 2 --misMatch 1 --matchRatio 0.4'. Duplicated reads that are identical in both ends were also removed by using SOAPnuke (v1.5.6) (Chen *et al.*, 2018) with parameter '-d' to get the final clean data. For the Hi-C library, the raw reads were processed using the HiC-Pro pipeline (Servant *et al.*, 2015).

The k-mer spectrum was built with 10× Genomics clean reads without barcode sequences using the jellyfish (v.1.2.1) (Marcais & Kingsford, 2011). The estimated genome sizes of *Begonia* with this method were 724.13, 805.91, 797.04 and 349.34



Mb for *B. loranthoides*, *B. masoniana*, *B. darthvaderiana*, and *B. peltatifolia*, respectively (Table S2). There were obvious peaks corresponding to k-mer caused by heterozygous sites. The main peak was observed on the half of the x-axis for both genomes of *B. masoniana* and *B. darthvaderiana* (Fig. S3). We also estimated genome heterozygosity ratio via SNP calling, resulting in estimated heterozygosity rates of 0.9%, 0.92%, 0.17%, and 0.24% for *B. masoniana*, *B. darthvaderiana*, *B. loranthoides*, and *B. peltatifolia*, respectively (Table S3), which is consistent with the k-mer estimation.

Considering that the relatively bigger genome size of *B. loranthoides*, *B. masoniana*, *B. darthvaderiana* compared with that of the *B. peltatifolia* may be due to higher repeat content, and k-mers with high frequency were associated with repetitive sequence. K-mer statistics of *B. loranthoides*, *B. masoniana*, *B. darthvaderiana* genomes were compared with that of *B. peltatifolia* (Fig. S3). *B. loranthoides* (63.12%), *B. masoniana* (53.02%), *B. darthvaderiana* (57.13%) genomes represented had about 9%, 19% and 15% k-mer with high-frequency more (two fold peak) than that of the *B. peltatifolia* (71.92%), indicating more repeat content in *B. loranthoides*, *B. masoniana*, *B. darthvaderiana* genome than *B. peltatifolia* genome. Comparison of high-frequent (depth more than 150) k-mer with length of 21, 41, 61 and 81 from reads of *B. loranthoides*, *B. masoniana*, *B. darthvaderiana*, *B. peltatifolia* genome indicated that *B. masoniana* and *B. darthvaderiana* genome had more high-frequent k-mers with length ranged from 21 to 81 than *B. loranthoides* and *B. peltatifolia* genome, suggesting that the lengths of most repeat content in *B. loranthoides* and *B. peltatifolia* genome were shorter than that of the *B. masoniana* and *B. darthvaderiana* genome.

We also compared the sequence or species of same high-frequent k-mer to estimate the specific element content in four *Begonia* genomes. Specific k-mer in *B. masoniana* and *B. darthvaderiana* genome were higher than that in *B. peltatifolia* genome, reflecting the great diversity of high-frequent k-mer sequences or repeats, which might explain the relatively larger genome size of *B. masoniana* and *B. darthvaderiana* than that of *B. peltatifolia*.

### **Genome assembly**



[1] Supernova assembly. For assembly of the 10× Genomics Chromium and stLFR library data, the clean fastq files were converted so as to be read by 10× Genomics Supernova (v.2.1.1) (Weisenfeld *et al.*, 2017) using an in-house script. Reads were then *de novo* assembled using Supernova (v.2.1.1) (Weisenfeld *et al.*, 2017) with default parameters. A minimum fasta record size of 100 bp was specified at the ‘mkoutput’ stage for outputting the assembly in the ‘pseudohap’ style. The best resultant assembly accumulated to 716.44, 779.20, 770.49, and 334.09 Mb with a contig N50 of 85.57, 15.26, 13.87, and 99.96 kb and a scaffold N50 of 6.73 Mb, 98.10 kb, 35.29 kb, and 3.20 Mb for *B. loranthoides* (10 ×), *B. masoniana* (stLFR), *B. darthvaderiana* (stLFR), and *B. peltatifolia* (10 ×) (Table S4), respectively. The *B. masoniana* and *B. darthvaderiana* assembly were too fragmented and insufficient compared with the estimated genome size due to high heterozygosity and repeat content.

[2] Canu assembly. *De novo* assemblies of the PacBio long reads for *B. masoniana* and *B. darthvaderiana* were conducted by Canu (v.0.1) (Koren *et al.*, 2017), which consisted of a four-step process involving: Detect overlaps in high-noise sequences using MHAP; Generate corrected sequence consensus; Trim corrected sequences to exclude some suspicious regions, such as remaining SMRTbell adapter; Assemble trimmed corrected sequences. For *Begonia* genome assembly in Canu (Koren *et al.*, 2017), the following parameters were specified: corOutCoverage=100, genomeSize = 800m. Default parameters were otherwise employed for Canu assembly. After this, two rounds of iterative corrections were performed with PacBio long reads using software Racon (v.1.2.1) (Vaser *et al.*, 2017), and two rounds of corrections with Pilon (v.1.22) (Walker *et al.*, 2014) using 10 × Genomics reads, yielding genome assemblies of 799.39 (contig N50, 436.44 kb) and 771.66 Mb (contig N50, 315.74 kb) for *B. masoniana* and *B. darthvaderiana*, respectively (Table S4).

[3] Comparisons and integration of the assemblies from PacBio and BGISEQ. Upon comparison of BGISEQ-derived contigs (Supernova or stLFR) and PacBio-derived contigs for *B. masoniana* and *B. darthvaderiana*, over 96.7% and 98.4% of the BGISEQ-derived contigs, with over 99% base identity, could be perfectly aligned to the PacBio-derived contigs, suggesting that high-depth BGISEQ data alone could also

produce a high-quality genome. However, the BGISEQ-derived assemblies had fewer complex repeat regions, lacking skewed GC with a lower average depth and long repetitive segmental sequences than the corresponding PacBio assembly. The BGISEQ-derived assembly was merged with the relative PacBio assembly to produce a hybrid scaffold. BGISEQ sequences were also used to assess the error rate of the integrated assembly and within-genome heterozygosity: high-quality data were aligned to the assembly using BWA-MEM (v. 0.7.10) (Li, 2013), followed by application of GATK (v.3.2-2) (Mckenna *et al.*, 2010) to call variants with a minimum coverage threshold of ten reads, including SNPs and indels. We corrected homozygous mismatches that might affect the base accuracy of the PacBio-derived assembly because of the high error rate (15~20 %) of raw PacBio reads.

### ***Assessment of assembly completeness***

[1] DNA and RNA mapping. We assessed the completeness of the genome assembly of four *Begonia* species from two aspects. First, by analysis of the proportions of DNA-seq reads represented in assembly, all the genomic paired-end reads was mapped against the final assembly using BWA-MEM (v. 0.7.10) (Li, 2013), include those from 10× Genomics, stLFR and Hi-C. The high ratios of total mapped reads indicated that most of the sequences were presented in final assembly. Second, by analysis of the proportions of RNA-seq reads represented in assembly, all the short reads from RNA-seq of five tissues (root, stem, flower, scape and leaf) were mapped back to the corresponding assembly using HISAT (Kim *et al.*, 2015). The total mapped reads reflected the representativeness of the expressed genes in the assembly. As a result, similarly high percentages of expressed sequences in five tissues were captured in the assembly.

[2] BUSCO assessment. The genome completeness in terms of expected gene content was quantified using the Benchmarking Universal Single-Copy Ortholog (BUSCO) assessment tool (Simao *et al.*, 2015) for four *Begonia*. Assembly completeness assessments employed BUSCO (v.4.1.2) (Simao *et al.*, 2015) with Augustus (v.3.3) (Stanke *et al.*, 2006), HMMER (v.3.1b2) (Finn *et al.*, 2011), and BLAST+ (v.2.7.1) (Altschul *et al.*, 1990), using both the embryophyta\_odb10 and the embryophyta\_odb10 BUSCO lineage datasets.

### ***Genome annotation***

[1] Gene annotation. We predicted gene models based on homology and *de novo* methods. Results were integrated with GLEAN (Elsik *et al.*, 2014). Homology based gene prediction used the gene models of four species (*Cucumis sativus*, *Cucurbita moschata*, *Momordica charantia*, and *Prunus mume*). We used TBLASTN to gather a non-redundant set of protein sequences, and then selected the most similar proteins for each candidate protein-coding region based on sequence similarity. Short fragments were connected with a custom script (SOLAR), and Genewise (v.2.0) (Birney *et al.*, 2004) was used to generate the gene structures based on the homology alignments. This generated four gene sets based on homology with four different species. We used Augustus (Stanke *et al.*, 2006), GlimmerHMM (Majoros *et al.*, 2004) and SNAP (Korf, 2004) for *de novo* gene prediction, with parameters trained on 800 intact genes from the homology-based predictions. We chose genes that were predicted by all programs for the final *de novo* gene set.

The four homology-based gene sets and one *de novo* gene set were integrated to generate a consensus gene set with GLEAN (Elsik *et al.*, 2014). We then filtered genes affiliated with repetitive DNA and genes whose coding sequence (CDS) regions contained more than 30% Ns. We used RNA-seq to polish the gene set. After filtering, we mapped reads to the genome with TopHat2 (Kim *et al.*, 2013), and used Stringtie (Pertea *et al.*, 2015) to assemble transcripts. Assembled transcripts were then used to predict open reading frames (ORFs). Transcript-based gene models with intact ORFs that had no overlap with the GLEAN gene set were added. GLEAN gene models were replaced by transcript-based gene models with intact ORFs when there was a discrepancy in length or merging of gene models. Transcripts without intact ORFs were used to extend the incomplete GLEAN gene models to find start and stop codons.

[2] Assessment of gene completeness. The features of predicted genes for four *Begonia* species, including number of genes, exon per gene, average length of mRNA, CDS, exon, intron, were compared with those of other genomes whose gene sets were used for homology-based method (Table S5). Most features of genes predicted in genome of four *Begonia* species were similar to those of other genomes, which

provided the confidence for gene prediction.

Percentages of RNA-seq reads that could be mapped to CDS of predicted genes can be used to assess the comprehension and completeness of the annotation of protein-coding genes. Data mapping revealed ~30% of unmapped RNA-seq reads, which could be attributed to two causations. First, they come from un-translated part of expressed genes; Second, they came from gene missed in the gene annotation. Considering good presentation of BUSCOs in genome assembly and gene set (Table S4), we inferred that they came from genes associated with *Begonia* specific features not shared by genes used in homology-based annotation.

Annotated gene set completeness was quantified using the BUSCO (Simao *et al.*, 2015) for four *Begonia* species (Table S4). Gene sets were first filtered to select the single longest protein sequence for any genes with annotated alternative transcripts. Gene set completeness assessments employed BUSCO (v.4.1.2) (Simao *et al.*, 2015) with HMMER (v.3.1b2) (Finn *et al.*, 2011), and BLAST+ (v.2.7.1) (Altschul *et al.*, 1990), using both the embryophyta\_odb9 and the embryophyta\_odb10 BUSCO lineage datasets.

[3] Function of proteins coded by predicted genes. Annotation of the predicted genes of four *Begonia* species were performed by aligning their sequences against a number of protein sequence databases, including InterPro (55.0) (Hunter *et al.*, 2009), Gene Ontology (Ashburner *et al.*, 2000), KEGG (v.89.1) (Ogata *et al.*, 1999), Swiss-Prot (release- 2017\_09) (Boeckmann *et al.*, 2003), TrEMBL (release- 2017\_09) (Boeckmann *et al.*, 2003) and NR (20170924). First, for the predicted protein-coding gene set for four *Begonia* species, each translated amino acid sequence was assessed for conserved protein domains in the Gene3D (Yeats *et al.*, 2007), HAMAP (Lima *et al.*, 2009), Pfam (Finn *et al.*, 2007), PIRSF (Wu *et al.*, 2004), PRINTS (Attwood *et al.*, 2003), ProDom (Corpet *et al.*, 2000), SMART (Letunic *et al.*, 2009), SUPERFAMILY (Wilson *et al.*, 2007), and TIGRFAM (Selengut *et al.*, 2007) databases using InterProScan (Quevillon *et al.*, 2005). The Gene Ontology IDs for each gene were obtained from the corresponding InterPro entries. Second, amino acid sequences were subjected to BLASTP v2.2.26 (e-value < 1e-5) using the following protein databases: Swiss-Prot (release- 2017\_09) (Boeckmann *et al.*, 2003), TrEMBL (release- 2017\_09) (Boeckmann *et al.*, 2003), Kyoto Encyclopaedia of Genes and Genomes (KEGG, v.

89.1) (Ogata *et al.*, 1999) and NCBI protein NR.

[4] Repeats in genome of *Begonia*. Repeat content is a general contributor for variation in genome size. Repeat sequences in the four *Begonia* genomes were identified as following: Tandem repeats were searched across the genome using the software Tandem Repeats Finder (v.4.07) (Benson, 1999); transposable elements (TEs) were predicted using a combination of homology-based comparisons with RepeatMasker (v.4.0.5) (Tarailo-Graovac & Chen, 2009) and RepeatProteinMask (Tarailo-Graovac & Chen, 2009), and *de novo* approaches with GT ltrharvest (Ellinghaus *et al.*, 2008), LTR\_FINDER (v.1.0.6) (Xu & Wang, 2007), and RepeatScout (v.1.0.5) (Price *et al.*, 2005). RepeatMasker (Tarailo-Graovac & Chen, 2009) was employed for DNA-level identification using a general library (RepBase20.04). At the protein level, RepeatProteinMask (Tarailo-Graovac & Chen, 2009), as implemented in RepeatMaske (Tarailo-Graovac & Chen, 2009) package, was employed for a WuBlastX search against the TE protein database. GT ltrharvest (Ellinghaus *et al.*, 2008) and LTR\_FINDER (Xu & Wang, 2007) searched the whole genome for a characteristic structure of the full-length long terminal repeat retrotransposons (LTRs). RepeatScout (Price *et al.*, 2005) built consensus sequences using fit-preferred alignment score. Contamination and multi-copy genes in the library were filtered first. RepeatMasker (Tarailo-Graovac & Chen, 2009) was used to predict the TEs with the library generated by RepeatScout. Finally, RepeatScout (Price *et al.*, 2005) was performed again to find homologs in the genome and categorize the identified repeats.

We also estimated TE insertion times with full-length LTR retrotransposons. The 5'- and 3'- LTR sequences of the retrotransposons were aligned and used to calculate the *K*-value (the average number of substitutions per aligned site) using the EMBOSS (v.6.5.7.0) (Rice *et al.*, 2000) package Distmat. The insertion times (T) were calculated using the formula:  $T = K / (2 * r)$ , where r represents the average substitution rate, which is  $1.3 * 10^{-8}$  substitutions per synonymous site per year. Among these elements, long terminal repeats (LTRs) were the most dominant type, accounting for approximately 67.44% and 63.45% of *B. masoniana* and *B. darthvaderiana* genome. TE insertion time calculations revealed a burst of LTR activity during the last 10 MYA (Fig. 3b), which is younger than the divergence of

four *Begonia* species (10-20 MYA), indicating that these LTRs were inserted into the genome after the divergences of the four *Begonia* species.

The annotation of transposon protein domains was further refined using DANTE-Protein Domain Finder, a new tool available at the RepeatExplorer server (Novak *et al.*, 2013), which employs BLAST searches against custom database of transposon protein domains. The hits were filtered to cover at least 80% of the reference sequence, with minimum identity of 35% and minimum similarity of 45%, allowing for max three interruptions (frame shifts or stop codons). To estimate the relative divergence times of the transposons, the ultrametric trees were calculated using PATHd8 (Britton *et al.*, 2007) program and relative branching times were extracted from the trees using R package Ape (Paradis *et al.*, 2004).

### **Genome evolution**

[1] Orthology delineation. Comparative genomic analysis was used to examine the rate of protein evolution and the conservation of gene repertoires among orthologs in the thirteen genomes. First, we aligned all-to-all proteins using BLASTP with an e-value cut-off of  $1e-5$ ; Genes were then clustered using OrthoMCL (v.1.4) (Li *et al.*, 2003) with a Markov inflation index of 1.5 and a maximum e-value of  $1e-5$ . On this basis, all ortholog groups (OGs) were ascertained for the thirteen reference genomes, and that, genes belonging to all or individual *Begonia* specific gene families and/or un-clustered genes were identified. Furthermore, based on pair-wise BLASTP alignment of *B. loranthoides* and three other *Begonia* species (*B. masoniana*, *B. darthvaderiana*, and *B. peltatifolia*) with an e-value of  $1e-5$ , we used the reciprocal best method to identify orthologous genes among four *Begonia* species, called reciprocal best ortholog gene pairs, which were high similar on amino acid level.

[2] Phylogenomic analysis. We performed phylogenomic analysis of the thirteen selected taxa with sequenced genomes by using one-to-one single-copy orthologous genes. OrthoMCL (Li *et al.*, 2003) clustered a total of 193 single-copy gene families, which were individually aligned with MAFFT (Katoh *et al.*, 2005) and then subjected to phylogenetic analyses using MrBayes (Ronquist & Huelsenbeck, 2003) with *Vitis vinifera* as outgroup. Phylogenomic reconstruction recovered a robust phylogenetic tree with all the relationships among the four *Begonia* species receiving full (1.00)

posterior probability support. We dated the phylogenetic tree with McMcTree as implemented in PAML (Yang, 2007), using two node calibrations: the split of Vitis-Cucurbitales (105-115 MYA), and the divergence of *Momordica charantia* from the rest of Cucurbitales (46-60 MYA). The dating result suggested the divergences of the four *Begonia* species occurred between 9.8-21.8 MYA.

Based on the dated phylogenetic tree of the 13 species, the expansion and contraction of the gene clusters were determined by CAFÉ (v.2.1) (De Bie *et al.*, 2006) on the basis of changes in gene family size in the generated phylogenetic history. This method models gene family evolution as a stochastic birth and death process, where genes were gained and lost independently along each branch of the phylogenetic tree. The result describes the rate of change as the probability that a gene family either expands (via gene gain) or contracts (via gene loss) per gene per million years, and can be estimated independently for all branches (Fig. S13).

[3] Evolutionary rate analysis. Single copy orthologs were extracted from OGs identified above. Peptide alignments were obtained by running GUIDANCE2 (Sela *et al.*, 2015) with the PRANK (Löytynoja, 2014) aligner and species tree were generated for each orthogroup. Low scoring residues were masked to N using GUIDANCE2 to mask poor quality regions of each alignment. PAL2NAL (Suyama *et al.*, 2006) was used to back-translate aligned peptide sequences to CDS and format alignments for PAML. PAML (Yang, 2007) was run to evaluate the likelihood of multiple hypothesized branch models of dN/dS relative to two null models with trees and parameters as follows: ((((((((((2,6),4),3),7),1 #1),8),5),9),10).

[4] Functional enrichment tests. For a given gene list, such as the *B. loranthoides* specific genes or conserved genes between *B. loranthoides* and other three *Begonia* species (*B. masoniana*, *B. darthvaderiana* and *B. peltatifolia*) that were used for GO enrichment analysis: the given gene list was carried out based on the algorithm implemented in GOstat, with the whole annotated gene set as the background. GOstat tests for GO terms represented by significantly more genes in a given gene set using chi-square test. Fisher's exact test is used when expected counts are below 5, which makes the chi-square test inaccurate. The computed p-value was then adjusted for multiple tests by specifying a false discovery rate ( $q$ -value < 0.05) using the



Benjamini-Hochberg method (Benjamini & Hochberg, 2000). Similar methods were also used for KEGG enrichment analysis.

[5] Gene collinearity. The syntenic blocks between two species were defined by MCscan (v. 0.8) (Tang *et al.*, 2008) based on core-orthologous gene sets identified using BLASTP (e-value  $\leq 1e - 5$  ; number of genes required to call synteny  $\geq 5$ ). Genes were then classified as collinear or non-collinear according to whether they have a homologous gene in the orthologous regions. If a homologous gene was not detected in the syntenic region of the target genome, we would search for homologous DNA sequences of the candidate gene in this region and syntenic status would be assigned 'without synteny status' for this gene when sequence remnants was detected, which means the orthologous gene was probably mis-annotated and the synteny status of this gene is not sure. To minimize the influence of sequence gaps on synteny analysis, we manually inspected the gap-containing genes and gap-flanking genes to confirm their synteny status and incorporate the result into synteny analysis. We also used *C. sativus* as outgroup to filter these candidate non-collinear genes that were collinear with outgroup.

Whole-genome duplication (WGD) is an important source for functional differentiation of genes. The sequence divergence for all possible pairs of paralogs within each collinear block was estimated based on *Ks*. Protein sequences were aligned using MAFFT (Kato *et al.*, 2005) and converted into codon-aligned nucleotides using the Bioruby-alignment package. *Ks* values were calculated through maximum likelihood estimation (MLE) using the 'codeml' 101 and 'yn00' 102 programs in the PAML (Yang, 2007) package and using the following parameters: runmode = -2, set-type = 1 (codon sequences), alpha fixed to 0, codonFreq = 2 (F2X4). For all *Ks* distribution histograms, the x-axes were drawn with non-transformed *Ks* values. The range of values, 0-3 was binned into 75 interval-bins by step 0.04. We used the nucleotide substitution rate of  $7 \times 10^{-9}$  per site per year (*r*) from synonymous sites, time of divergence was calculated with the formula  $T = Ks / 2r$ , where *Ks* is the number of substitutions per base between subgenomes and *r* is the rate of substitution. The bimodal nature of the *Begonia* *Ks* histogram was: the WGD event shared by all four *Begonia* species estimated to have occurred ~35 MYA (mean: 35 MYA, std dev: 8 MYA,  $Ks = 0.50 \pm 0.11$ ) and, the whole-genome triplication event

( $\gamma$ ) common to all core Eudicots occurred  $\sim$ 118 MYA (mean: 118 MYA, std dev: 2 MYA,  $Ks = 1.65 \pm 0.29$ ) (Fig. 2c).

[6] Reconstruction of the *Begonia* paleo-genome. An evolutionary scenario was obtained following the method described by Pont *et al* (Pont *et al.*, 2019), based on synteny relationships identified between between *B. peltatifolia* and *B. masoniana*, *B. peltatifolia* and *B. darthvaderiana*, and *B. peltatifolia* and *B. loranthoides*. Briefly, the first step consisted of aligning the investigated genomes to define conserved/duplicated gene pairs on the basis of alignment parameters (CIP for Cumulative Identity Percentage and CALP Cumulative Alignment Length Percentage). The second step consisted of clustering or chaining groups of conserved genes into synteny blocks (excluding blocks with less than 5 genes) corresponding to independent sets of blocks sharing orthologous relationships in modern species. In the third step, conserved gene pairs or conserved groups of gene-to- gene adjacencies defining identical chromosome-to-chromosome relationships between all the extant genomes were merged into conserved ancestral regions (CARs). CARs were then merged into proto- chromosomes based on partial synteny observed between a subset (not all) of the investigated species. The ancestral karyotype can be considered as a ‘median’ or ‘intermediate’ genome consisting of proto- chromosomes defining a clean reference gene order common to the extant species investigated. From the reconstructed ancestral karyotype an evolutionary scenario was then inferred taking into account the fewest number of genomic rearrangements (including inversions, deletions, fusions, fissions, translocations) that may have operated between the inferred ancestors and the modern genomes (Fig. S16).

### ***Principal component analysis (PCA) analysis of TE diversity***

Low-quality sequences FASTQ with bases having quality below 20 on Phred 33 scale, adapter trimming, and duplicates removal was performed using SOAPnuke (v.1.5.6) program. The reads with length less than 120 bp were discarded and only the paired reads were used for subsequent analyses. The whole filtered reads were mapping to custom transposon protein domains database (Viridiplantae\_v3.0\_pdb) with blastx. The best hits were filtered to cover at least 90% of the reference sequence, with minimum identity of 30%. After this, the counts were normalized by dividing the

number of counts on a specific domain by the total number of counts on all TE domains and by the total number of occurrences of each domain per million, and then counts were transformed to log<sub>10</sub> scale. PCA was conducted across the TE domain with at least 10% of the individuals happened with FactoMineR package, and results were visualized with factoextra package.

### ***Plastome assembly***

The raw WGS data were trimmed and filtered for adaptors, low quality reads, undersized inserts, and duplicate reads using Trimmomatic (Bolger *et al.*, 2014). The resultant clean reads were used for *de novo* plastome assembly with Novoplasty (Dierckxsens *et al.*, 2017) using the seed sequence of *rbcL*, and the reference genome sequence of the *B. masoniana* plastome extracted from the genome assembly of *B. masoniana* based on PacBio long reads data. All the newly assembled 78 *Begonia* plastid genomes were annotated by transferring the annotations from the published plastome of *Cucumis sativus* from the closely related family Cucurbitaceae to *Begonia* sequences following MAFFT (Kato *et al.*, 2005) alignment in Geneious (v.10.0.2) (Biomatters, New Zealand).

### ***Genetic variation and admixture pattern***

#### [1] Phylogenetic reconstruction

Phylogenetic trees of nuclear and chloroplast DNA sequences were constructed based on SNPs within regions of single-copy genes. The filtered SNPs were converted to phylip format. The maximum likelihood (ML) trees were constructed using IQ-Tree (Nguyen *et al.*, 2015) with self-estimated best substitution model and ultra-fast bootstrap replicates of 5,000. The best maximum likelihood tree was used as a starting tree to estimate species divergence time using MCMC Tree as implemented in PAML (Yang, 2007). One calibration point of the *Begonia* crown group (24 +3.57 MYA with a normal distribution) was defined following Moonlight *et al* (Moonlight *et al.*, 2018).

To validate the phylogenetic reconstructions of plastid and nuclear SNP dataset, we also produced a large dataset of 1,604 nuclear single copy genes using the software Hybpiper (Johnson *et al.*, 2016) using the reference protein sequences of 4,000 single copy genes extracted from four newly generated *Begonia* genomes. Individual genes were manually checked for orthology, and filtered based on taxa

occurrences (> 50%), aligned with MAFFT (Katoh *et al.*, 2005), and trimmed with GBLOCKS (Talavera & Castresana, 2007). Supermatrix and supertree method were used to infer the nuclear phylogeny using RAxML (v.7.2.3) (Stamatakis, 2006) and ASTRAL III (Mirarab *et al.*, 2014), respectively.

#### [2] Admixture analysis

Ancestral population stratification among all the *Begonia* accessions was inferred using Admixture (Alexander *et al.*, 2009) software. We evaluated the ancestral population sizes of  $K=1-20$  and selected the population with the smallest cross-validation error ( $K=3$  in this case). The parameter standard errors were estimated using bootstrapping (bootstrap=200) when doing the admixture analyses.

#### [3] Principal components analysis and diversity statistics

We used PLINK (v.2) (Chang *et al.*, 2015), GCTA (v.1.93) (Yang *et al.*, 2011), and VCFtools (v.0.1.16) (Danecek *et al.*, 2011) for the calculation of principal components and other population divergence statistics.

#### [4] ABBA-BABA analysis

To detect the introgression among *Begonia* species, we calculated the Patterson's D statistic using the program Dsuite (Malinsky *et al.*, 2020). D-statistic is widely used to examine site patterns (also known as ABBA/ABAB patterns) in genome alignments for a specified four-taxon tree. Given four taxa with the relationship of "[ $(P1,P2),P3$ ],O", a D-statistic significantly differed from zero indicate introgression between population P1 and P3 (negative D value) or between P2 and P3 (positive D value).

#### ***Identification of orthologs of the light regulatory network***

The representative *Arabidopsis* proteins (CRYs, AT4G08920, AT1G04400; CUL4, AT5G46210; COP1, AT2G32950; UVR8, AT5G63860; SPA, AT1G53090, AT3G15354, AT2G46340, AT4G11110; HY5, AT5G11260, AT3G17609; PhyA-E, AT1G09570, AT2G18790, AT5G35840, AT4G16250, AT4G18130; EIN3 and EIL1, AT2G25490 and AT5G25350; FHY3 and FAR1, AT3G22170 and AT4G15090; YUC, AT4G32540, AT1G04180, AT2G33230, AT1G04610, AT5G25620, AT4G28720,

AT5G43890, AT1G48910; HB2 and HB4, AT4G16780, AT2G44910; EBF, AT2G25490 and AT5G25350; PHOT1-2, AT3G45780 and AT5G58140) in the light regulatory network were used as templates to perform BLASTP searches against the protein sequences of *Begonia* and selected angiosperm genomes. Sequences with an e-value below  $1e-10$  and reference sequence coverage over 50% were extracted and annotated with InterProScan (Quevillon *et al.*, 2005). Sequences that were assigned to the corresponding gene family were identified as candidate orthologs. All the candidate orthologs were subjected to phylogenetic reconstruction using MAFFT (Kato *et al.*, 2005) and PhyML (v3.1) (Guindon & Gascuel, 2003) to further remove the false positives.

As all the PIF genes identified are members of the bHLH subfamily 15, hence we take the following steps to characterize PIF genes as described by Chang *et al* (Han *et al.*, 2019). First, HLH domain (PF00010) was used as templates to perform HMMER (Finn *et al.*, 2011) searches with an e-value cutoff of  $1e-2$ . Then, all the hits were extracted to reconstruct the phylogenetic tree using PhyML (v3.1) (Guindon & Gascuel, 2003). After that, those PIFs that occurred in a monophyletic assemblage with *Arabidopsis* homologs and contained APB motif (ELxxxxGQ) were selected as candidate PIF orthologs (Han *et al.*, 2019).

Sequences that assigned the “crytochrome/DNA photolyase class 1” annotation with conserved PF03441, PF00875, PF12546 domains were identified as CRY orthologs. The sequences annotated with cullin-4B and aligned with PF00888 were extracted as candidate CUL orthologs. Sequences with the InterProScan annotation of “Ultraviolet-B receptor UVR8” and alignment domain corresponding to HMM profile (PF00415) were identified as candidate UVR8 orthologs. The sequences annotated with cullin-4B and aligned with PF00888 were extracted as candidate CUL orthologs.

### ***Transcriptome analysis of light/dark-responsive genes***

For light/dark treatment experiments, seedling of *B. masoniana* were obtained from tissue culture, after growth in artificial climate chamber for one month under condition of 24°C, 16 h of light/8 h of dark, light intensity  $45 \mu\text{mol}\cdot\text{m}^{-2}\cdot\text{sec}^{-1}$ , the plants were transferred to continuous white light or darkness for 3 days before transfer to the opposite light condition for 1 and 3 days. Leaf samples were frozen in liquid nitrogen and stored at -80°C until RNA isolation for RNA-seq.

Total RNAs were extracted using TIANGEN RNA extraction kit (Tiangen Biotech Co., Ltd., Beijing, China). Total RNA (1.5  $\mu$ g) from each sample was prepared, and libraries were generated using NEBNext® Ultra™ RNA Library Prep Kit for Illumina® (NEB, USA). Subsequently, the libraries were sequenced on an Illumina HiSeq platform (Novogene Co., Ltd., Beijing, China). Three biological replicates were used for each sample. Gene expression levels were calculated as fragments-per-kilobase-of-transcript-per-million-fragments-mapped (FPKM).

## 1 References

- 2 **Alexander DH, Novembre J, Lange K. 2009.** Fast model-based estimation of ancestry in  
3 unrelated individuals. *Genome Research* **19**: 1655-1664.
- 4 **Altschul SF, Gish W, Miller W, Myers EW, Lipman DJ. 1990.** Basic local alignment search  
5 tool. *Journal of Molecular Biology* **215**: 403-410.
- 6 **Ashburner M, Ball CA, Blake JA, Botstein D, Butler H, Cherry JM, Davis AP, Dolinski  
7 K, Dwight SS, Eppig JT, et al. 2000.** Gene ontology: tool for the unification of  
8 biology. *Nature Genetics* **25**: 25-29.
- 9 **Attwood TK, Bradley P, Flower DR, Gaulton A, Maudling N, Mitchell AL, Uddin A.  
10 2003.** PRINTS and its automatic supplement, prePRINTS. *Nucleic Acids Research* **31**:  
11 400-402.
- 12 **Benjamini Y, Hochberg Y. 2000.** On the adaptive control of the false discovery rate in  
13 multiple testing with independent statistics. *Journal of Educational and Behavioral  
14 Statistics* **25**: 60-83.
- 15 **Benson G. 1999.** Tandem repeats finder: a program to analyze DNA sequences. *Nucleic Acids  
16 Research* **27**: 573-580.
- 17 **Birney E, Clamp M, Durbin R. 2004.** GeneWise and Genomewise. *Genome Research* **14**:  
18 988-995.
- 19 **Boeckmann B, Bairoch A, Apweiler R, Blatter MC, Estreicher A, Gasteiger E, Martin  
20 MJ, Michoud K, O'Donovan C, Phan I, et al. 2003.** The SWISS-PROT protein  
21 knowledgebase and its supplement TrEMBL in 2003. *Nucleic Acids Research* **31**:  
22 365-370.
- 23 **Bolger AM, Lohse M, Usadel B. 2014.** Trimmomatic: a flexible trimmer for Illumina  
24 sequence data. *Bioinformatics* **30**: 2114-2120.
- 25 **Britton T, Anderson CL, Jacquet D, Lundqvist S, Bremer K. 2007.** Estimating divergence  
26 times in large phylogenetic trees. *Systematic Biology* **56**: 741-752.
- 27 **Chang CC, Chow CC, Tellier LC, Vattikuti S, Purcell SM, Lee JJ. 2015.**  
28 Second-generation PLINK: rising to the challenge of larger and richer datasets.  
29 *Gigascience* **4**: 7.
- 30 **Chen Y, Chen Y, Shi C, Huang Z, Zhang Y, Li S, Li Y, Ye J, Yu C, Li Z, et al. 2018.**  
31 SOAPnuke: a MapReduce acceleration-supported software for integrated quality  
32 control and preprocessing of high-throughput sequencing data. *Gigascience* **7**: 1-6.



- 33 **Corpet F, Servant F, Gouzy J, Kahn D. 2000.** ProDom and ProDom-CG: tools for protein  
34 domain analysis and whole genome comparisons. *Nucleic Acids Research* **28**:  
35 267-269.
- 36 **Danecek P, Auton A, Abecasis G, Albers CA, Banks E, DePristo MA, Handsaker RE,**  
37 **Lunter G, Marth GT, Sherry ST, et al. 2011.** The variant call format and VCFtools.  
38 *Bioinformatics* **27**: 2156-2158.
- 39 **De Bie T, Cristianini N, Demuth JP, Hahn MW. 2006.** CAFE: a computational tool for the  
40 study of gene family evolution. *Bioinformatics* **22**: 1269-1271.
- 41 **Dierckxsens N, Mardulyn P, Smits G. 2017.** NOVOPlasty: *de novo* assembly of organelle  
42 genomes from whole genome data. *Nucleic Acids Research* **45**: e18.
- 43 **Drmanac R, Sparks AB, Callow MJ, Halpern AL, Burns NL, Kermani BG, Carnevali P,**  
44 **Nazarenko I, Nilsen GB, Yeung G, et al. 2010.** Human genome sequencing using  
45 unchained base reads on self-assembling DNA nanoarrays. *Science* **327**: 78-81.
- 46 **Ellinghaus D, Kurtz S, Willhoeft U. 2008.** LTRharvest, an efficient and flexible software for  
47 *de novo* detection of LTR retrotransposons. *BMC Bioinformatics* **9**: 18.
- 48 **Elsik CG, Worley KC, Bennett AK, Beye M, Camara F, Childers CP, de Graaf DC,**  
49 **Debyser G, Deng J, Devreese B, et al. 2014.** Finding the missing honey bee genes:  
50 lessons learned from a genome upgrade. *BMC Genomics* **15**: 86.
- 51 **Finn RD, Clements J, Eddy SR. 2011.** HMMER web server: interactive sequence similarity  
52 searching. *Nucleic Acids Research* **39**: W29-37.
- 53 **Finn RD, Tate J, Mistry J, Coghill PC, Sammut SJ, Hotz HR, Bateman A. 2007.** The  
54 Pfam protein families database. *Nucleic Acids Research* **36**: D281-D288.
- 55 **Guindon S, Gascuel O. 2003.** A simple, fast, and accurate algorithm to estimate large  
56 phylogenies by maximum likelihood. *Systematic Biology* **52**: 696-704.
- 57 **Han X, Chang X, Zhang Z, Chen H, He H, Zhong B, Deng XW. 2019.** Origin and  
58 evolution of core components responsible for monitoring light environment changes  
59 during plant terrestrialization. *Molecular Plant* **12**: 847-862.
- 60 **Hunter S, Apweiler R, Attwood TK, Bairoch A, Bateman A, Binns D, Bork P, Das U,**  
61 **Daugherty L, Duquenne L, et al. 2009.** InterPro: the integrative protein signature  
62 database. *Nucleic Acids Research* **37**: D211-215.
- 63 **Johnson MG, Gardner EM, Liu Y, Medina R, Goffinet B, Shaw AJ, Zerega NJ, Wickett**  
64 **NJ. 2016.** HybPiper: Extracting coding sequence and introns for phylogenetics from  
65 high-throughput sequencing reads using target enrichment. *Applications in Plant*

- 66 *Sciences* **4**: apps. 1600016.
- 67 **Katoh K, Kuma K, Toh H, Miyata T. 2005.** MAFFT version 5: improvement in accuracy of  
68 multiple sequence alignment. *Nucleic Acids Research* **33**: 511-518.
- 69 **Kim D, Langmead B, Salzberg SL. 2015.** HISAT: a fast spliced aligner with low memory  
70 requirements. *Nature Methods* **12**: 357-360.
- 71 **Kim D, Pertea G, Trapnell C, Pimentel H, Kelley R, Salzberg SL. 2013.** TopHat2:  
72 accurate alignment of transcriptomes in the presence of insertions, deletions and gene  
73 fusions. *Genome Biology* **14**: R36.
- 74 **Koren S, Walenz BP, Berlin K, Miller JR, Bergman NH, Phillippy AM. 2017.** Canu:  
75 scalable and accurate long-read assembly via adaptive k-mer weighting and repeat  
76 separation. *Genome Research* **27**: 722-736.
- 77 **Korf I. 2004.** Gene finding in novel genomes. *BMC Bioinformatics* **5**: 59.
- 78 **Löytynoja A 2014.** Phylogeny-aware alignment with PRANK. In Russell DJ. *Multiple*  
79 *Sequence Alignment Methods*. Totowa (NJ): Humana Press. 155-170.
- 80 **Letunic I, Doerks T, Bork P. 2009.** SMART 6: recent updates and new developments.  
81 *Nucleic Acids Research* **37**: D229-D232.
- 82 **Li H. 2013.** Aligning sequence reads, clone sequences and assembly contigs with BWA-MEM.  
83 *arXiv*: 1303.3997.
- 84 **Li L, Stoeckert CJ, Jr., Roos DS. 2003.** OrthoMCL: identification of ortholog groups for  
85 eukaryotic genomes. *Genome Research* **13**: 2178-2189.
- 86 **Lima T, Auchincloss AH, Coudert E, Keller G, Michoud K, Rivoire C, al. e, Phan I. 2009.**  
87 HAMAP: a database of completely sequenced microbial proteome sets and manually  
88 curated microbial protein families in UniProtKB/Swiss-Prot. *Nucleic Acids Research*  
89 **37**: D471-D478.
- 90 **Majoros WH, Pertea M, Salzberg SL. 2004.** TigrScan and GlimmerHMM: two open source  
91 ab initio eukaryotic gene-finders. *Bioinformatics* **20**: 2878-2879.
- 92 **Malinsky M, Matschiner M, Svardal H. 2020.** Dsuite - fast D-statistics and related  
93 admixture evidence from VCF files. *bioRxiv*: 634477.
- 94 **Marcais G, Kingsford C. 2011.** A fast, lock-free approach for efficient parallel counting of  
95 occurrences of k-mers. *Bioinformatics* **27**: 764-770.
- 96 **Mckenna A, Hanna M, Banks E, Sivachenko A, Cibulskis K, Kernytsky A. 2010.** The  
97 Genome Analysis Toolkit: A MapReduce framework for analyzing next-generation  
98 DNA sequencing data. *Genome Research* **20**: 1297-1303.

- 99 **Mirarab S, Reaz R, Bayzid MS, Zimmermann T, Swenson MS, Warnow T. 2014.**  
100        ASTRAL: genome-scale coalescent-based species tree estimation. *Bioinformatics* **30**:  
101        i541-548.
- 102 **Moonlight PW, Ardi WH, Padilla LA, Chung K-F, Fuller D, Girmansyah D, Hollands R,**  
103        **Jara-Muñoz A, Kiew R, Leong W-C, et al. 2018.** Dividing and conquering the  
104        fastest-growing genus: Towards a natural sectional classification of the mega-diverse  
105        genus *Begonia* (Begoniaceae). *Taxon* **67**: 267-323.
- 106 **Nguyen LT, Schmidt HA, von Haeseler A, Minh BQ. 2015.** IQ-TREE: a fast and effective  
107        stochastic algorithm for estimating maximum-likelihood phylogenies. *Molecular*  
108        *Biology and Evolution* **32**: 268-274.
- 109 **Novak P, Neumann P, Pech J, Steinhaisl J, Macas J. 2013.** RepeatExplorer: a Galaxy-based  
110        web server for genome-wide characterization of eukaryotic repetitive elements from  
111        next-generation sequence reads. *Bioinformatics* **29**: 792-793.
- 112 **Ogata H, Goto S, Sato K, Fujibuchi W, Bono H, Kanehisa M. 1999.** KEGG: Kyoto  
113        Encyclopedia of Genes and Genomes. *Nucleic Acids Research* **27**: 29-34.
- 114 **Paradis E, Claude J, Strimmer K. 2004.** APE: Analyses of phylogenetics and evolution in R  
115        language. *Bioinformatics* **20**: 289-290.
- 116 **Pertea M, Pertea GM, Antonescu CM, Chang TC, Mendell JT, Salzberg SL. 2015.**  
117        StringTie enables improved reconstruction of a transcriptome from RNA-seq reads.  
118        *Nature Biotechnology* **33**: 290.
- 119 **Pont C, Wagner S, Kremer A, Orlando L, Plomion C, Salse J. 2019.** Paleogenomics:  
120        reconstruction of plant evolutionary trajectories from modern and ancient DNA.  
121        *Genome Biology* **20**: 29.
- 122 **Price AL, Jones NC, Pevzner PA. 2005.** *De novo* identification of repeat families in large  
123        genomes. *Bioinformatics* **21** i351-358.
- 124 **Quevillon E, Silventoinen V, Pillai S, Harte N, Mulder N, Apweiler R, Lopez R. 2005.**  
125        InterProScan: protein domains identifier. *Nucleic Acids Research* **33**: W116-W120.
- 126 **Rice P, Longden I, Bleasby A. 2000.** EMBOSS: the European molecular biology open  
127        software suite. *Trends in Genetics* **16**: 276-277.
- 128 **Ronquist F, Huelsenbeck JP. 2003.** MrBayes 3: Bayesian phylogenetic inference under  
129        mixed models. *Bioinformatics* **19**: 1572-1574.
- 130 **Sela I, Ashkenazy H, Katoh K, Pupko T. 2015.** GUIDANCE2: accurate detection of  
131        unreliable alignment regions accounting for the uncertainty of multiple parameters.

- 132 *Nucleic Acids Research* **43**: W7-14.
- 133 **Selengut JD, Haft DH, Davidsen T, Ganapathy A, Gwinn-Giglio M, et al. 2007.**
- 134 TIGRFAMs and Genome Properties: tools for the assignment of molecular function
- 135 and biological process in prokaryotic genomes. *Nucleic Acids Research* **35**:
- 136 D260-D264.
- 137 **Servant N, Varoquaux N, Lajoie BR, Viara E, Chen CJ, Vert JP, Heard E, Dekker J,**
- 138 **Barillot E. 2015.** HiC-Pro: an optimized and flexible pipeline for Hi-C data
- 139 processing. *Genome Biology* **16**: 259.
- 140 **Simao FA, Waterhouse RM, Ioannidis P, Kriventseva EV, Zdobnov EM. 2015.** BUSCO:
- 141 assessing genome assembly and annotation completeness with single-copy orthologs.
- 142 *Bioinformatics* **31**: 3210-3212.
- 143 **Stamatakis A. 2006.** RAxML-VI-HPC: maximum likelihood-based phylogenetic analyses
- 144 with thousands of taxa and mixed models. *Bioinformatics* **22**: 2688-2690.
- 145 **Stanke M, Keller O, Gunduz I, Hayes A, Waack S, Morgenstern B. 2006.** AUGUSTUS:
- 146 *ab initio* prediction of alternative transcripts. *Nucleic Acids Research* **34**:
- 147 W435-W439.
- 148 **Suyama M, Torrents D, Bork P. 2006.** PAL2NAL: robust conversion of protein sequence
- 149 alignments into the corresponding codon alignments. *Nucleic Acids Research* **34**:
- 150 W609-612.
- 151 **Talavera G, Castresana J. 2007.** Improvement of phylogenies after removing divergent and
- 152 ambiguously aligned blocks from protein sequence alignments. *Systematic Biology* **56**:
- 153 564-577.
- 154 **Tang H, Wang X, Bowers JE, Ming R, Alam M, Paterson AH. 2008.** Unraveling ancient
- 155 hexaploidy through multiply-aligned angiosperm gene maps. *Genome Research* **18**:
- 156 1944-1954.
- 157 **Tarailo-Graovac M, Chen N. 2009.** Using RepeatMasker to identify repetitive elements in
- 158 genomic sequences. *Current Protocols in Bioinformatics* **Chapter 4**:
- 159 4.10.11-14.10.14.
- 160 **Vaser R, Sovic I, Nagarajan N, Sikic M. 2017.** Fast and accurate *de novo* genome assembly
- 161 from long uncorrected reads. *Genome Research* **27**: 737-746.
- 162 **Walker BJ, Abeel T, Shea T, Priest M, Abouelliel A, S. S, Cuomo CA, Zeng Q, Wortman**
- 163 **J, Young SK, et al. 2014.** Pilon: an integrated tool for comprehensive microbial
- 164 variant detection and genome assembly improvement. *PLoS ONE* **9**: e112963.

- 165 **Weisenfeld NI, Kumar V, Shah P, Church DM, Jaffe DB. 2017.** Direct determination of  
166 diploid genome sequences. *Genome Research* **27**: 757-767.
- 167 **Wilson D, Madera M, Vogel C, Chothia C, Gough J. 2007.** The SUPERFAMILY database  
168 in 2007: families and functions. *Nucleic Acids Research* **35**: D308-D313.
- 169 **Wu CH, Nikolskaya A, Huang H, Yeh LSL, Natale DA, Vinayaka CR, Ledley RS. 2004.**  
170 PIRSF: family classification system at the Protein Information Resource. *Nucleic*  
171 *Acids Research* **32**: D112-D114.
- 172 **Xu Z, Wang H. 2007.** LTR\_FINDER: an efficient tool for the prediction of full-length LTR  
173 retrotransposons. *Nucleic Acids Research* **35**: W265-268.
- 174 **Yang J, Lee SH, Goddard ME, Visscher PM. 2011.** GCTA: a tool for genome-wide  
175 complex trait analysis. *American Journal of Human Genetics* **88**: 76-82.
- 176 **Yang Z. 2007.** PAML4: phylogenetic analysis by maximum likelihood. *Molecular Biology*  
177 *and Evolution* **24**: 1586-1591.
- 178 **Yeats C, Lees J, Reid A, Kellam P, Martin N, Liu X, Orengo C. 2007.** Gene3D:  
179 comprehensive structural and functional annotation of genomes. *Nucleic Acids*  
180 *Research* **36**: D414-D418.
- 181

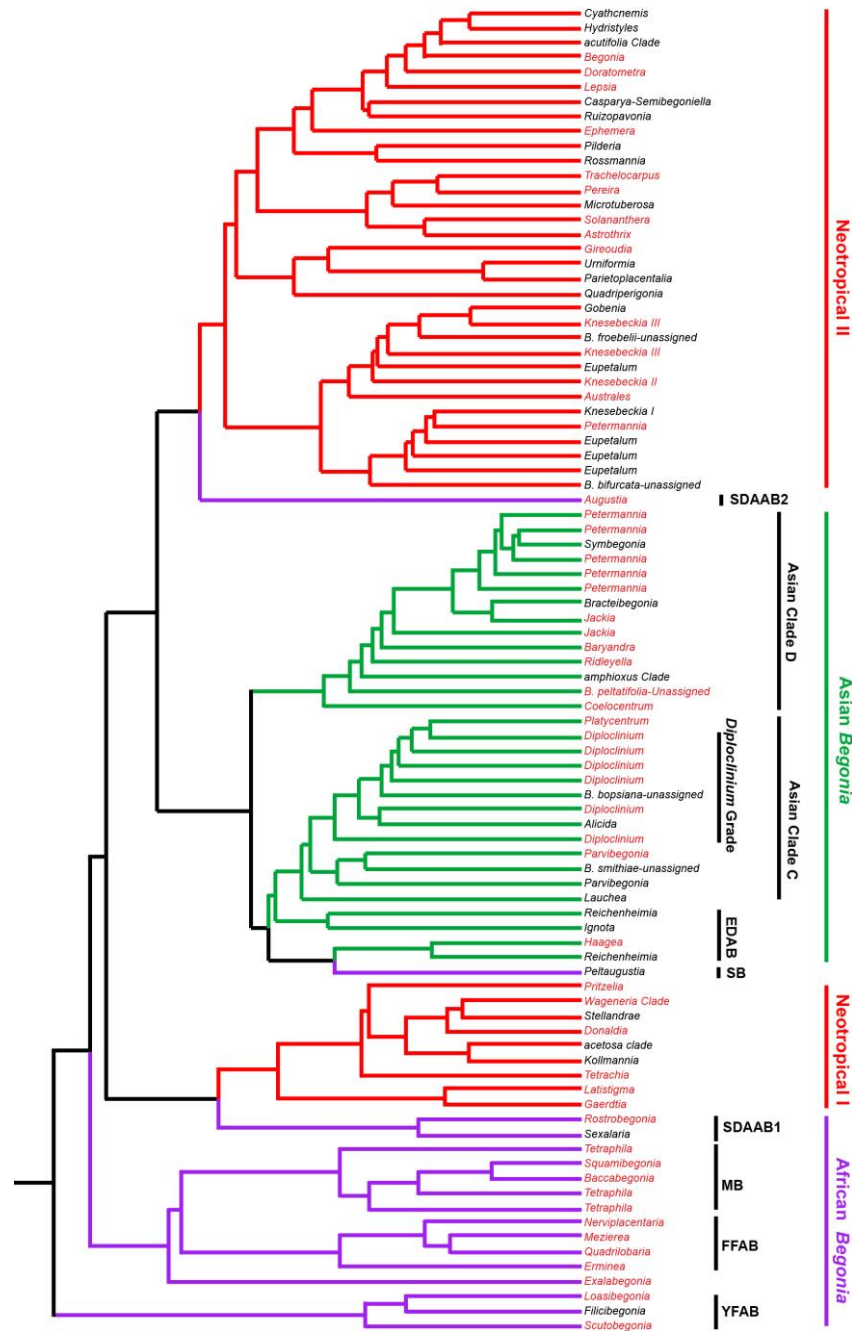

**Fig. S1** Current WGS samplings of *Begonia* accessions (78 individuals in 37 sections, as marked in red) on the sectional level *Begonia* phylogeny by Moonlight *et al* (Moonlight *et al.*, 2018). Branches leading to African, Neotropical and Asian accessions were colored in purple, red, and green respectively. Abbreviations: YFAB, Yellow-flowered African *Begonia*; FFAB, Fleshy-fruited African *Begonia*; MB, Malagasy *Begonia*; SDAAB, Seasonally dry adapted African *Begonia*, SB, Socotran *Begonia*; EDAB, Early Diverging Asian *Begonia*.

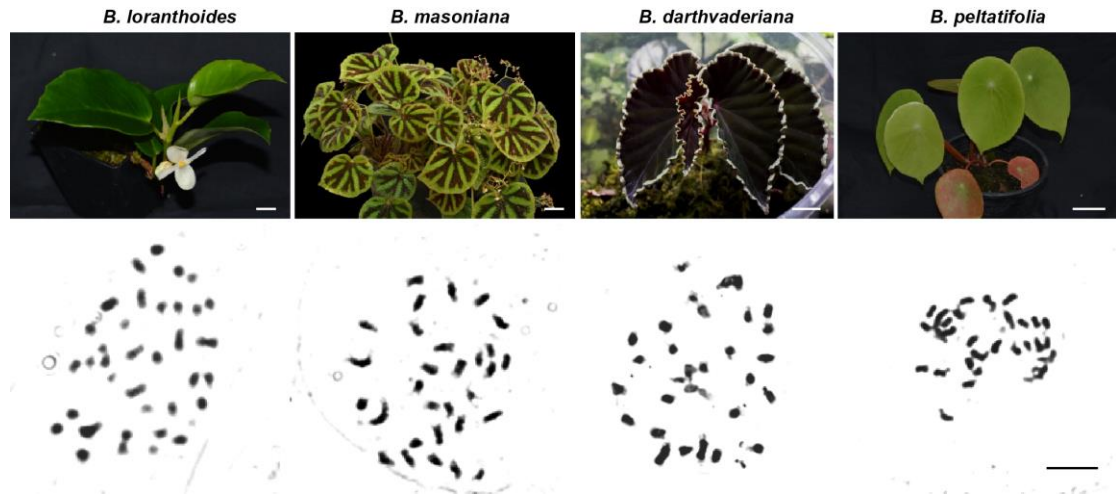

**Fig. S2 Somatic chromosome counts at metaphase in the four sequenced *Begonia* species.** From right to left: *B. loranthoides* ( $2n = 38$ ); *B. masoniana* ( $2n = 30$ ), *B. darthvaderiana* ( $2n = 30$ ); *B. peltatifolia* ( $2n = 30$ ). Up: bar = 3 cm, lower: bar = 0.5  $\mu\text{m}$ .



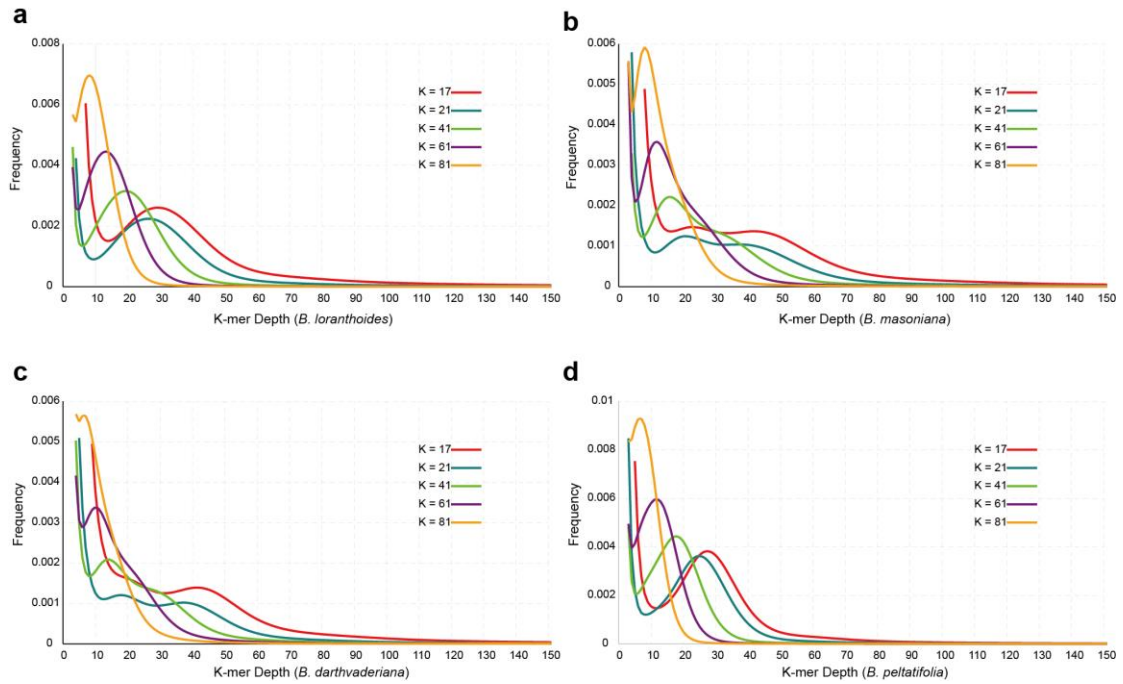

**Fig. S3 K-mer analyses of the four *Begonia* species. (a) *B. loranthoides* (genome size~724 Mb); (b) *B. masoniana* (genome size ~806 Mb); (c) *B. darthvaderiana* (genome size~797 Mb); (d) *B. peltatifolia* (genome size ~349 Mb).**

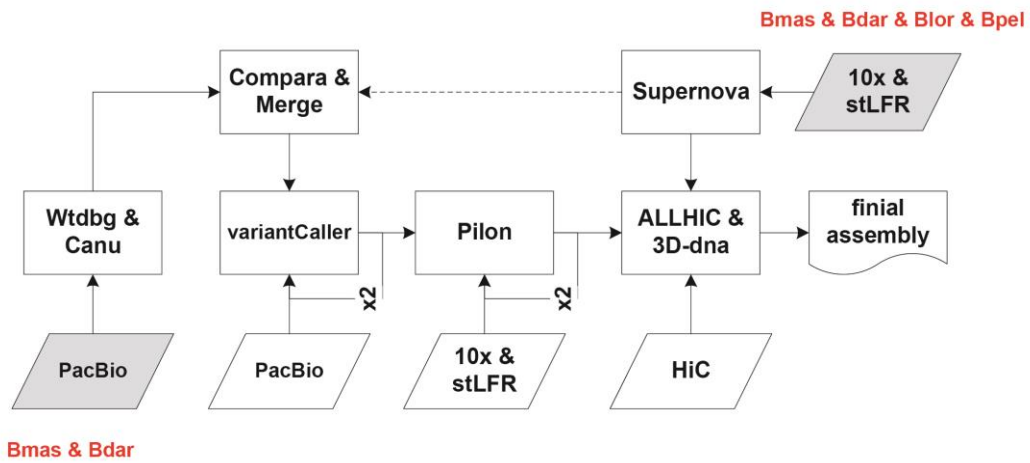

**Fig. S4** Flowchart of sequencing and assembly for the four *Begonia* species. Bmas: *B. masoniana*, Bdar: *B. darthvaderiana*, Blor: *B. loranthoids*, Bpel: *B. peltatifolia*.

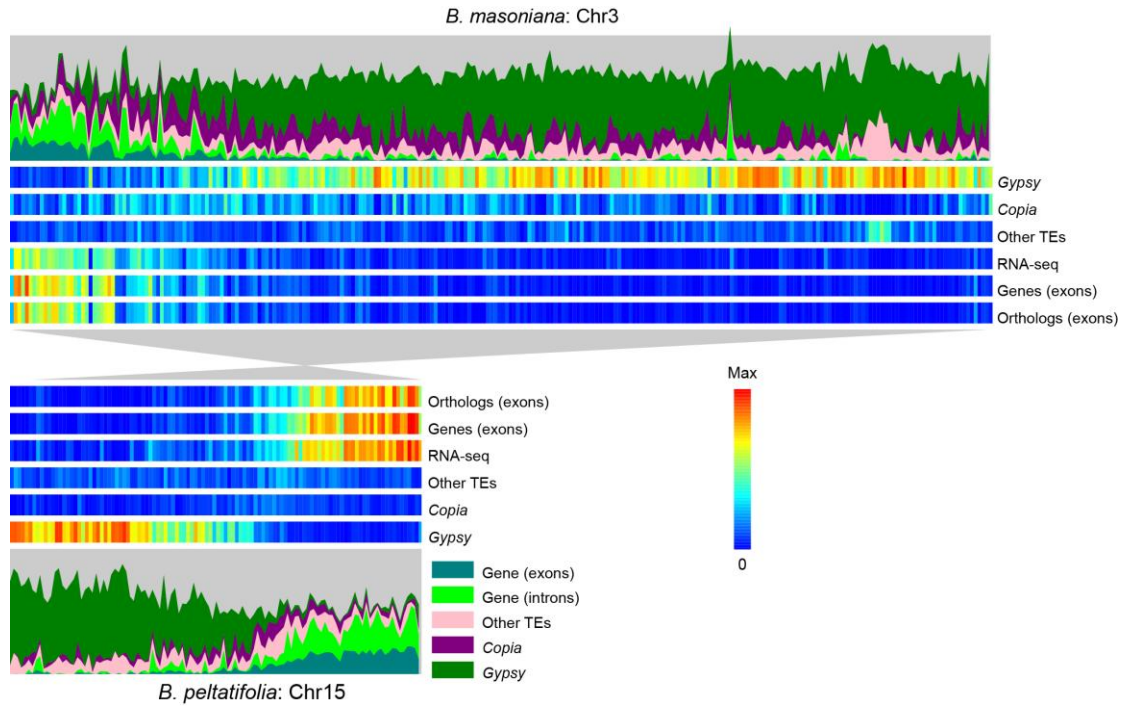

**Fig. S5 Scaffold collinear comparisons between two different species (upper: *B. masoniana*, bottom: *B. peltatifolia*) show distinct distribution of different transposon elements.**

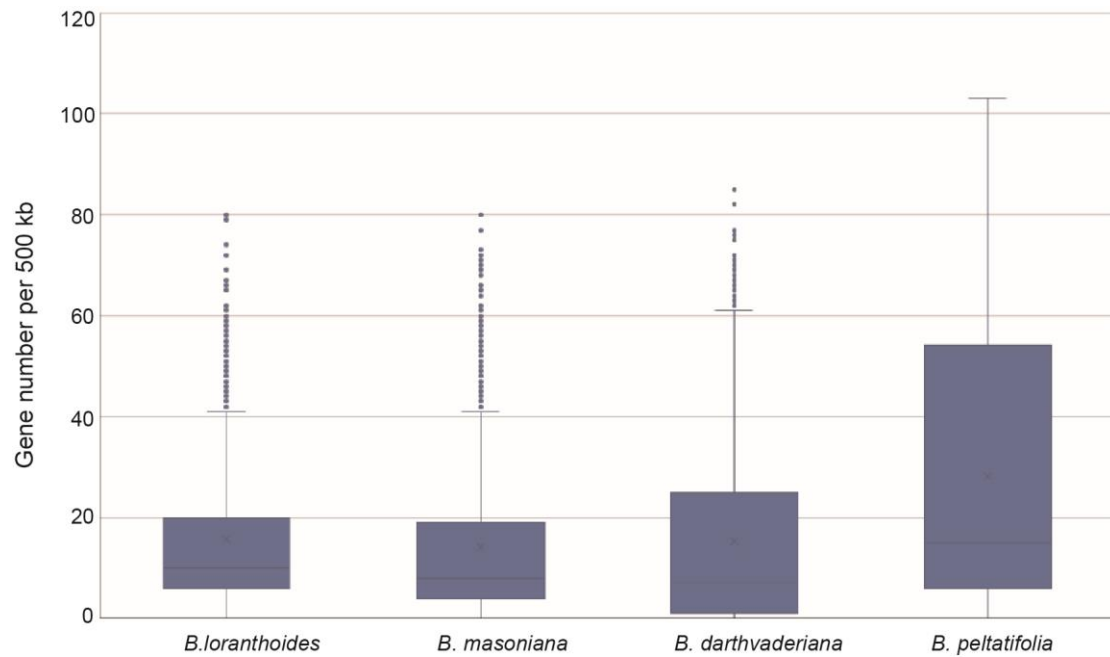

**Fig. S6 Distribution of gene density of four *Begonia* genomes.** In each box plot, the central rectangle spans the first quartile to the third quartile, the line inside the rectangle shows the median, and the whiskers denote 1.5 interquartile ranges from the box and outlying values plotted beyond the whiskers.

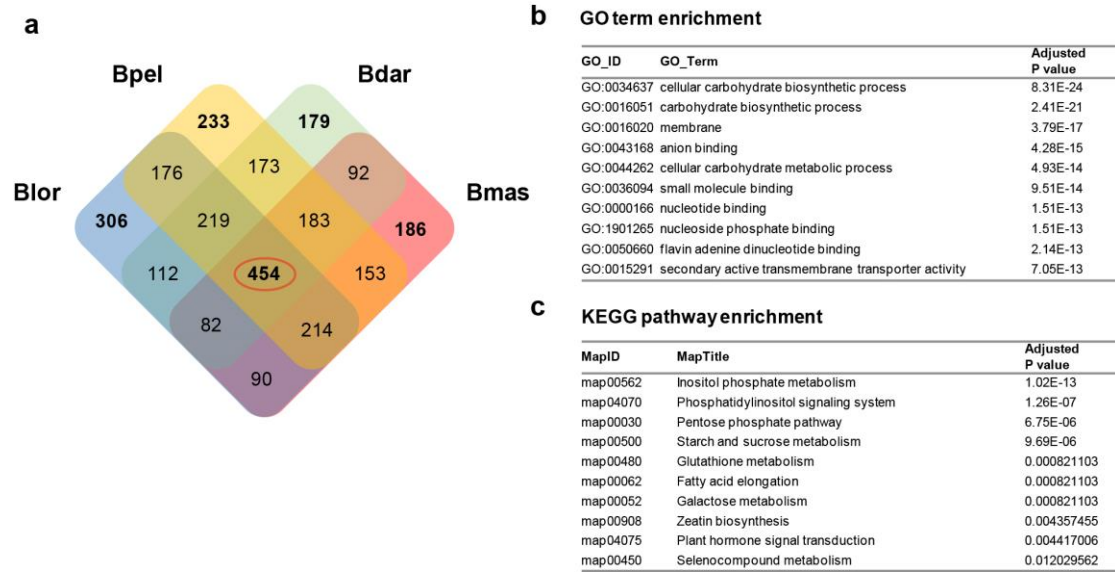

**Fig. S7 Analyses of post-WGD retained genes families in *Begonia*.** (a) Venn diagram showing the number of gene families shared among four *Begonia* species. Blor, *B. loranthoides*; Bmas, *B. masoniana*; Bdar, *B. darthvaderiana*; Bpel, *B. peltatifolia*. (b) GO term enrichment of the shared 454 gene families. Only top ten terms were shown. (c) KEGG pathway enrichment of the shared 454 gene families.

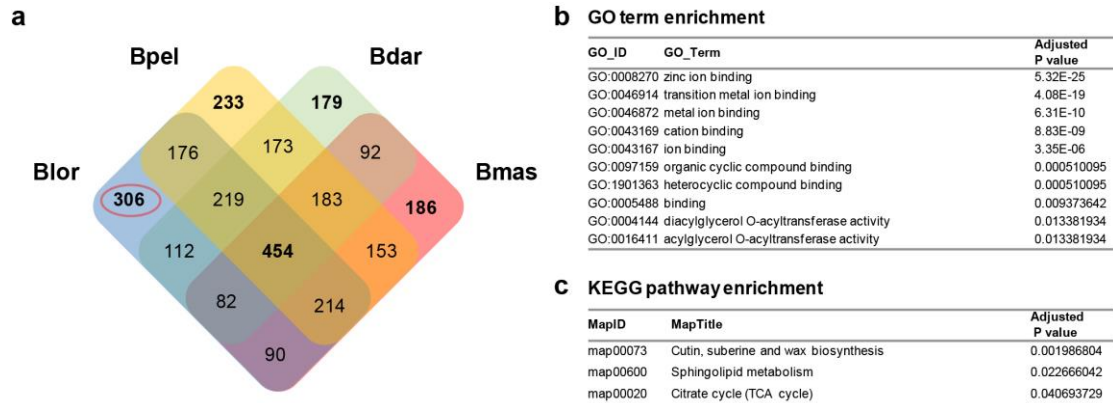

**Fig. S8 Analysis of post-WGD retained genes families specific to *B. loranthoides*.** (a) Venn diagram showing the number of gene families shared among four *Begonia* species. Blor, *B. loranthoides*; Bmas, *B. masoniana*; Bdar, *B. darthvaderiana*; Bpel, *B. peltatifolia*. (b) GO term enrichment of the 306 gene families specifically retained in *B. loranthoides*. Only top ten terms were shown. (c) KEGG pathway enrichment of the specific 306 gene families.

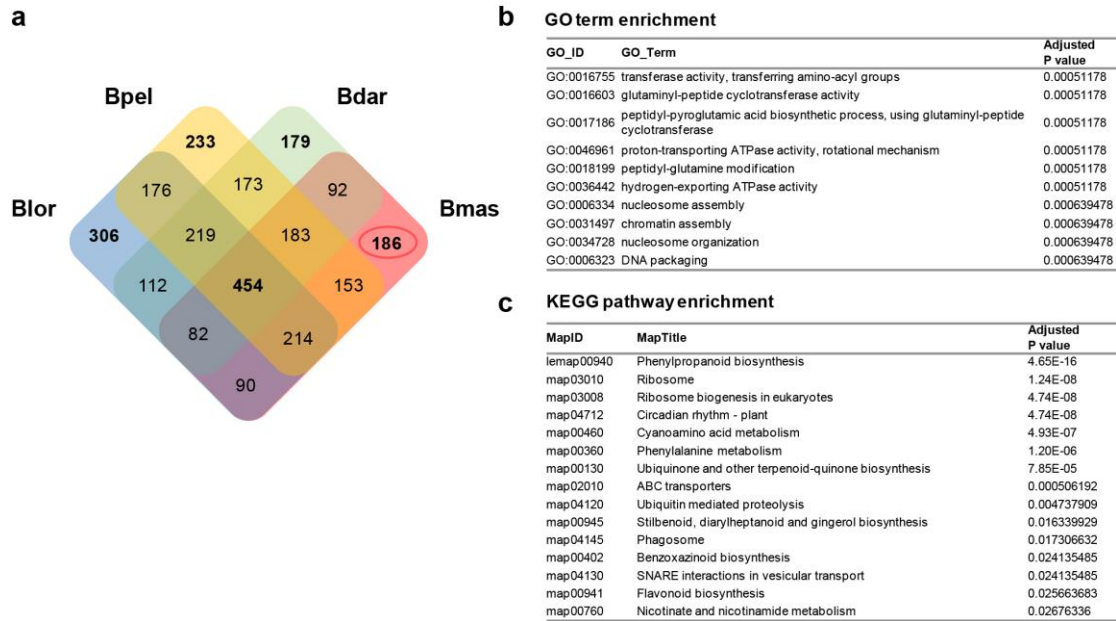

**Fig. S9 Analysis of post-WGD retained genes families specific to *B. masoniana*.** (a) Venn diagram showing the number of gene families shared among four *Begonia* species. Blor, *B. loranthoides*; Bmas, *B. masoniana*; Bdar, *B. darthvaderiana*; Bpel, *B. peltatifolia*. (b) GO term enrichment of the 186 gene families specifically retained in *B. masoniana*. Only top ten terms were shown. (c) KEGG pathway enrichment of the specific 186 gene families.



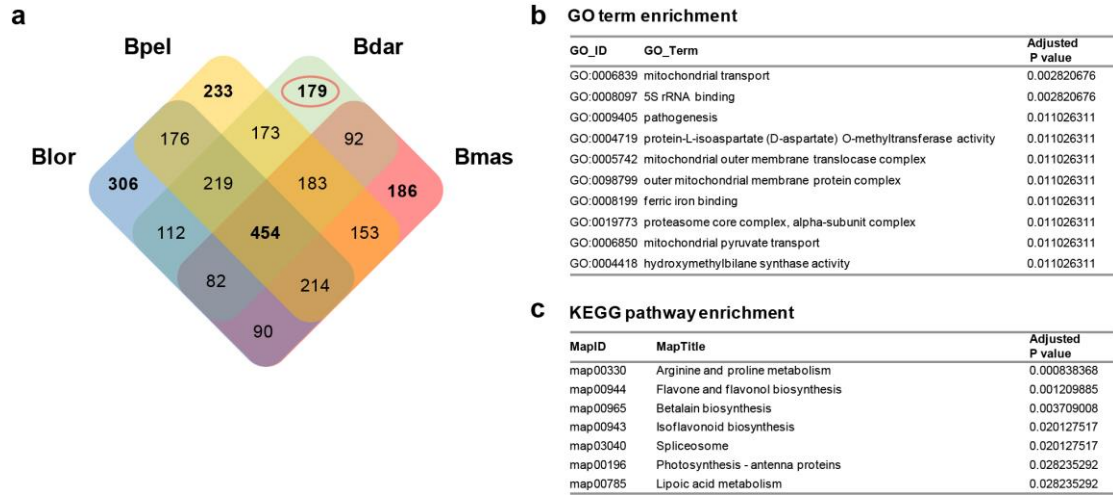

**Fig. S10 Analysis of post-WGD retained genes families specific to *B. darthvaderiana*.** (a) Venn diagram showing the number of gene families shared among four *Begonia* species. Blor, *B. loranthoides*; Bmas, *B. masoniana*; Bdar, *B. darthvaderiana*; Bpel, *B. peltatifolia*. (b) GO term enrichment of the 179 gene families specifically retained in *B. darthvaderiana*. Only top ten term were shown. (c) KEGG pathway enrichment of the specific 179 gene families.

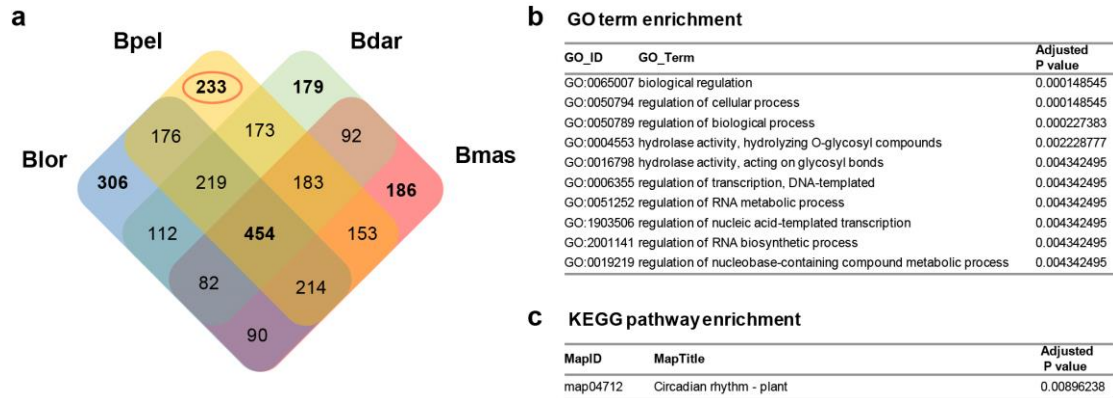

**Fig. S11 Analysis of post-WGD retained gene families specific to *B. peltatifolia*.** (a) Venn diagram showing the number of gene families shared among four *Begonia* species. Blor, *B. loranthoides*; Bmas, *B. masoniana*; Bdard, *B. darthvaderiana*; Bpel, *B. peltatifolia*. (b) GO term enrichment of the 233 gene families specifically retained in *B. peltatifolia*. Only top ten terms were shown. (c) KEGG pathway enrichment of the specific 233 gene families.

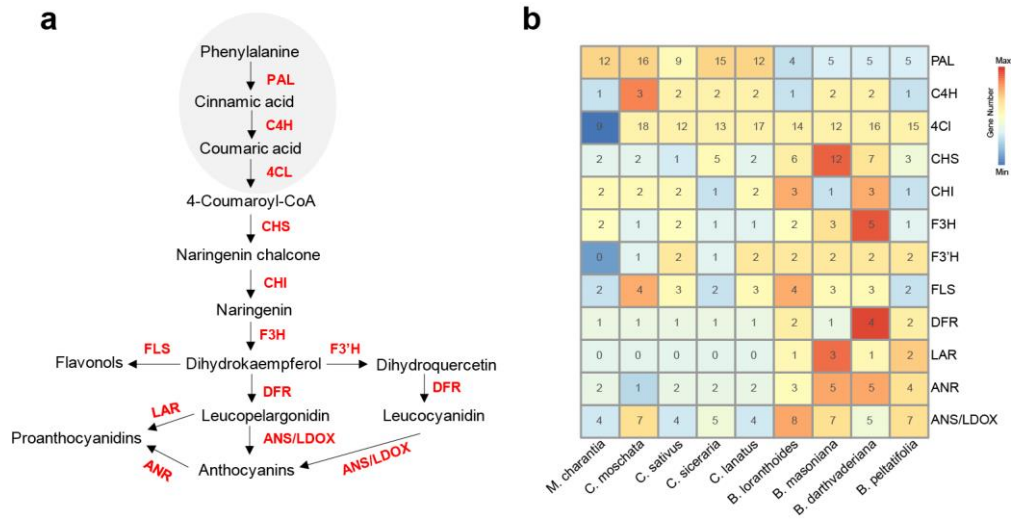

**Fig. S12 Expansion of gene families in anthocyanin pathway in *Begonia*.** (a) Overview of the anthocyanin biosynthetic pathway with the general phenylpropanoid pathway indicated in grey shade. (b) Gene families in the anthocyanin biosynthesis that are expanded in *Begonia*. Enzyme abbreviations: PAL, phenylalanine ammonia lyase; C4H, cinnamate 4-hydroxylase; 4CL, 4-coumaroyl:CoA ligase; CHS, chalcone synthase; CHI, chalcone isomerase; F3H, flavanone 3-hydroxylase; F3'H, flavonoid 3' hydroxylase; DFR, dihydroflavonol 4-reductase; LAR, anthocyanidin reductase; ANR, anthocyanidin reductase; ANS/LDOX, anthocyanidin synthase/leucoanthocyanidin dioxygenase.

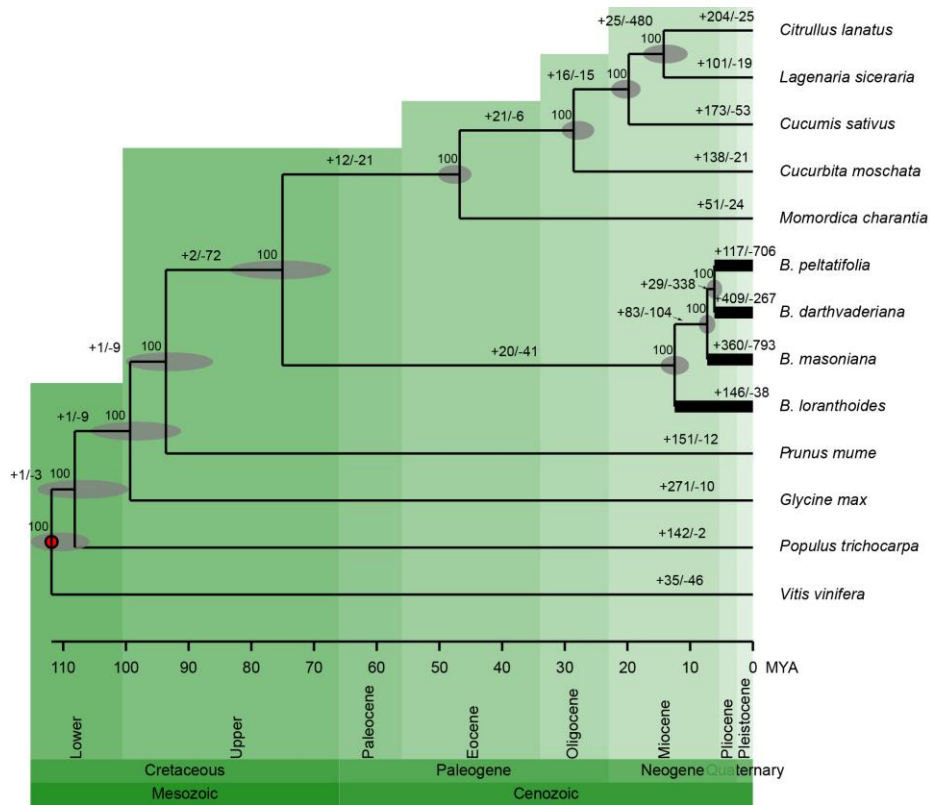

**Fig. S13 Gene family expansions and contractions along a dated angiosperm phylogeny of 13 selected species.** The numbers of significantly ( $p$ -value < 0.01) expanded and contracted gene families are shown above the branches. Fossil calibration point and divergence times are indicated by red dot and grey ovals at the internodes, respectively. The range of the ovals indicates the 95% confidence interval of the divergence time.

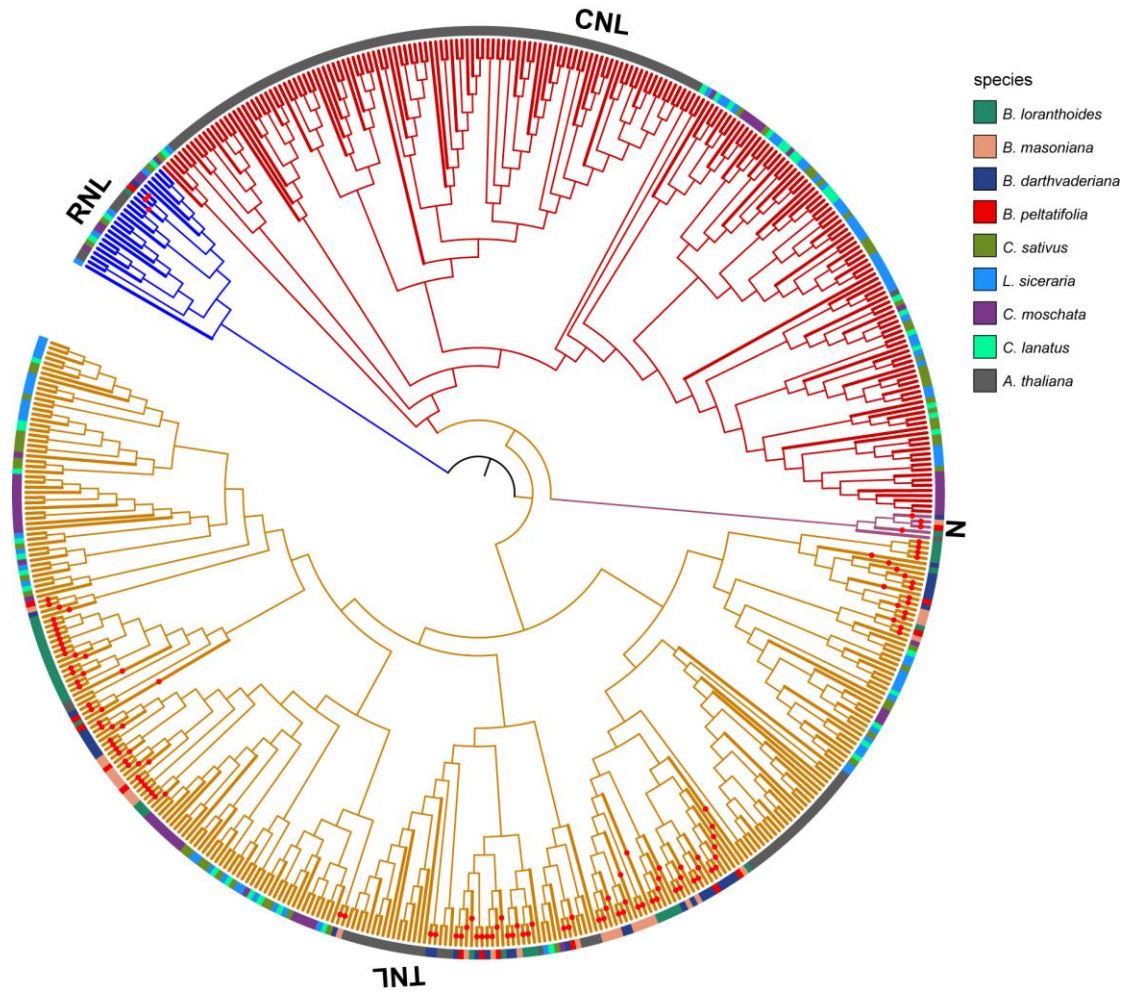

**Fig. S14** Contraction and complete loss of the TNL subgroup of NBS family in *Begonia*. Homologues of NBS genes of the four *Begonia* species are highlighted by red circle upon the branch.

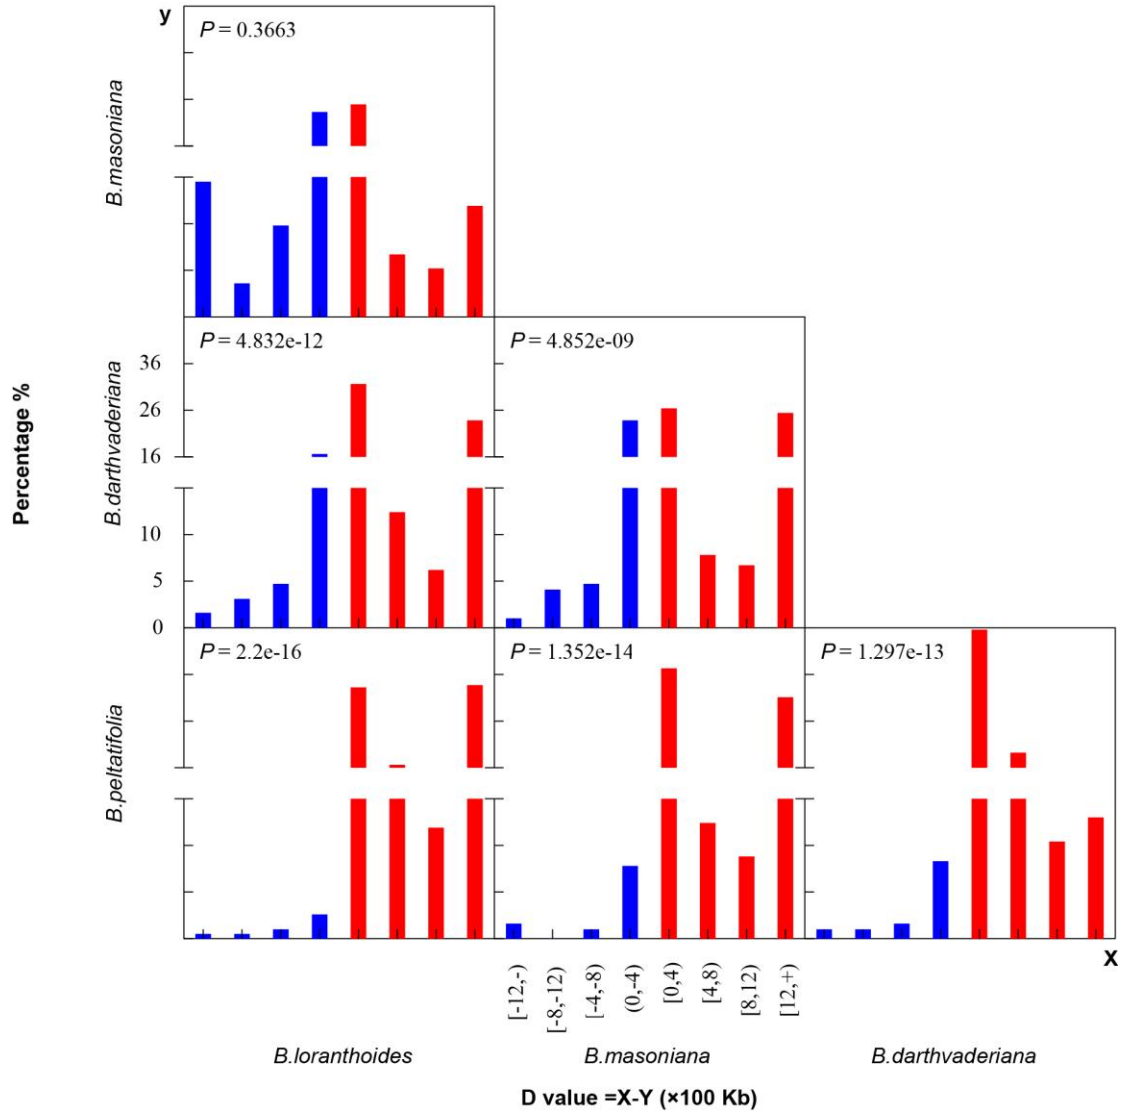

**Fig. S15 Comparison of TE proportions in 122 shared syntenic blocks across four *Begonia* species.** D value indicates difference value range of TE size from right species minus that of left. Red and blue bars indicate positive and negative values, respectively. P values indicates levels of difference significance between positive and negative values.

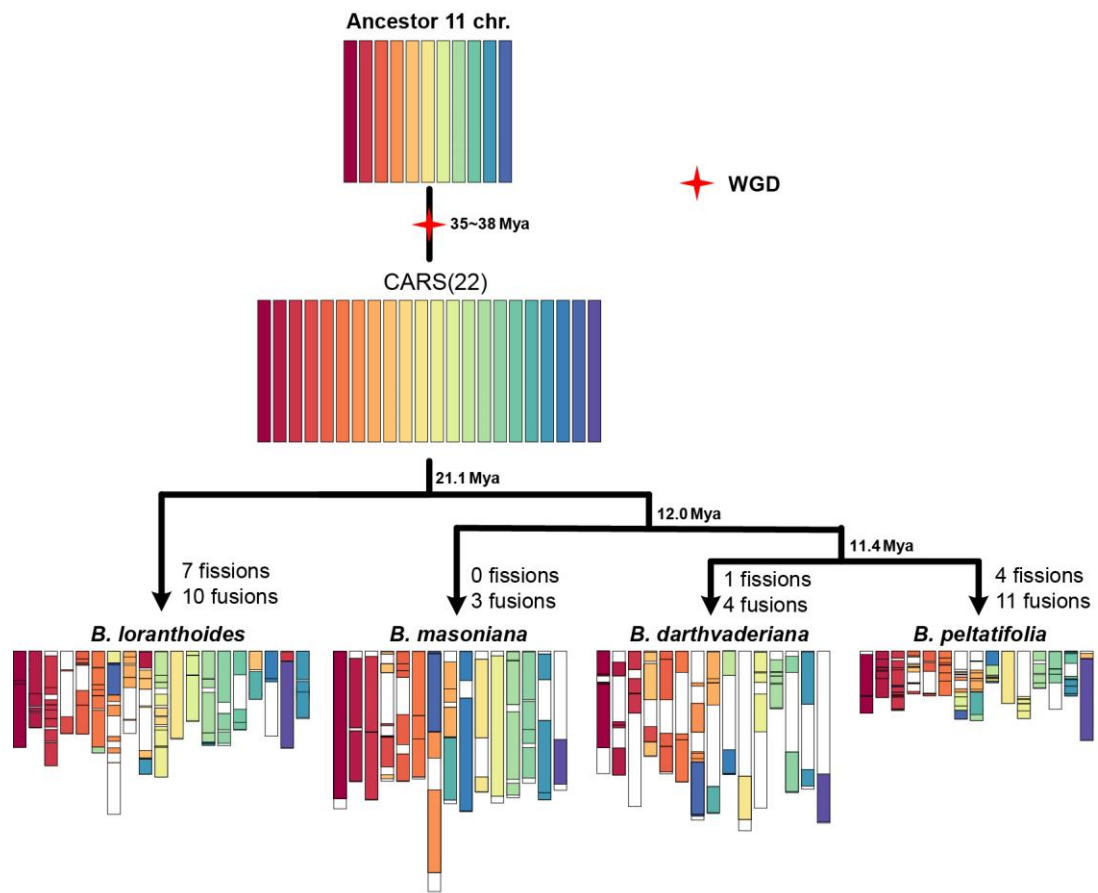

**Fig. S16 Reconstruction of paleo-genome of four sequenced *Begonia* species.**  
CARS, conserved ancestral regions.



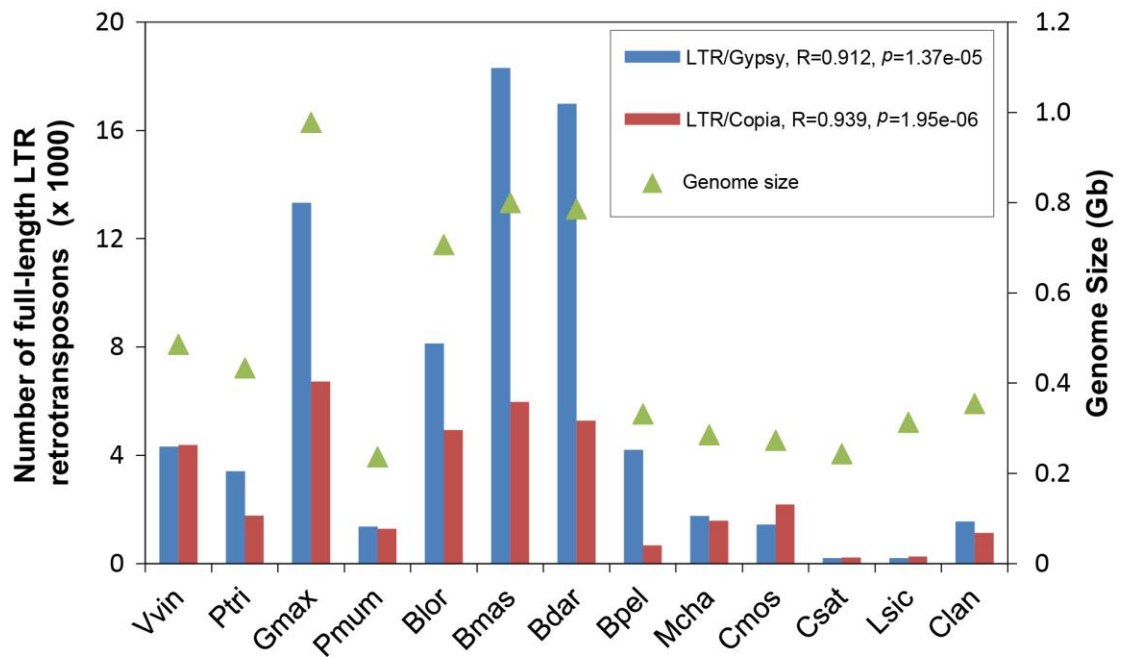

**Fig. S17** Number of LTR insertions and genome sizes for 13 angiosperm species. Vvin, *Vitis vinifera*; Ptri, *Populus trichocarpa*; Gmax, *Glycine max*; Pmum, *Prunus mume*; Mcha, *Momordica charantia*; Cmos, *Cucurbita moschata*; Cast, *Cucumis sativus*; Lsic, *Lagenaria siceraria*; Clan, *Citrullus lanatus*.

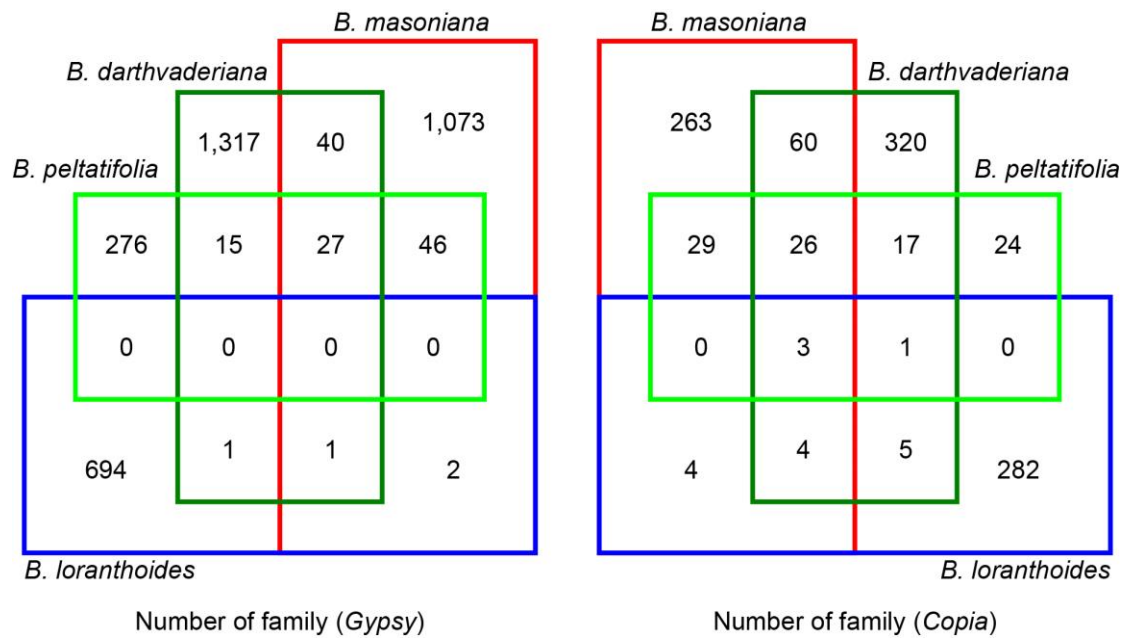

**Fig. S18** Number of shared full length LTR families across four *Begonia* species.

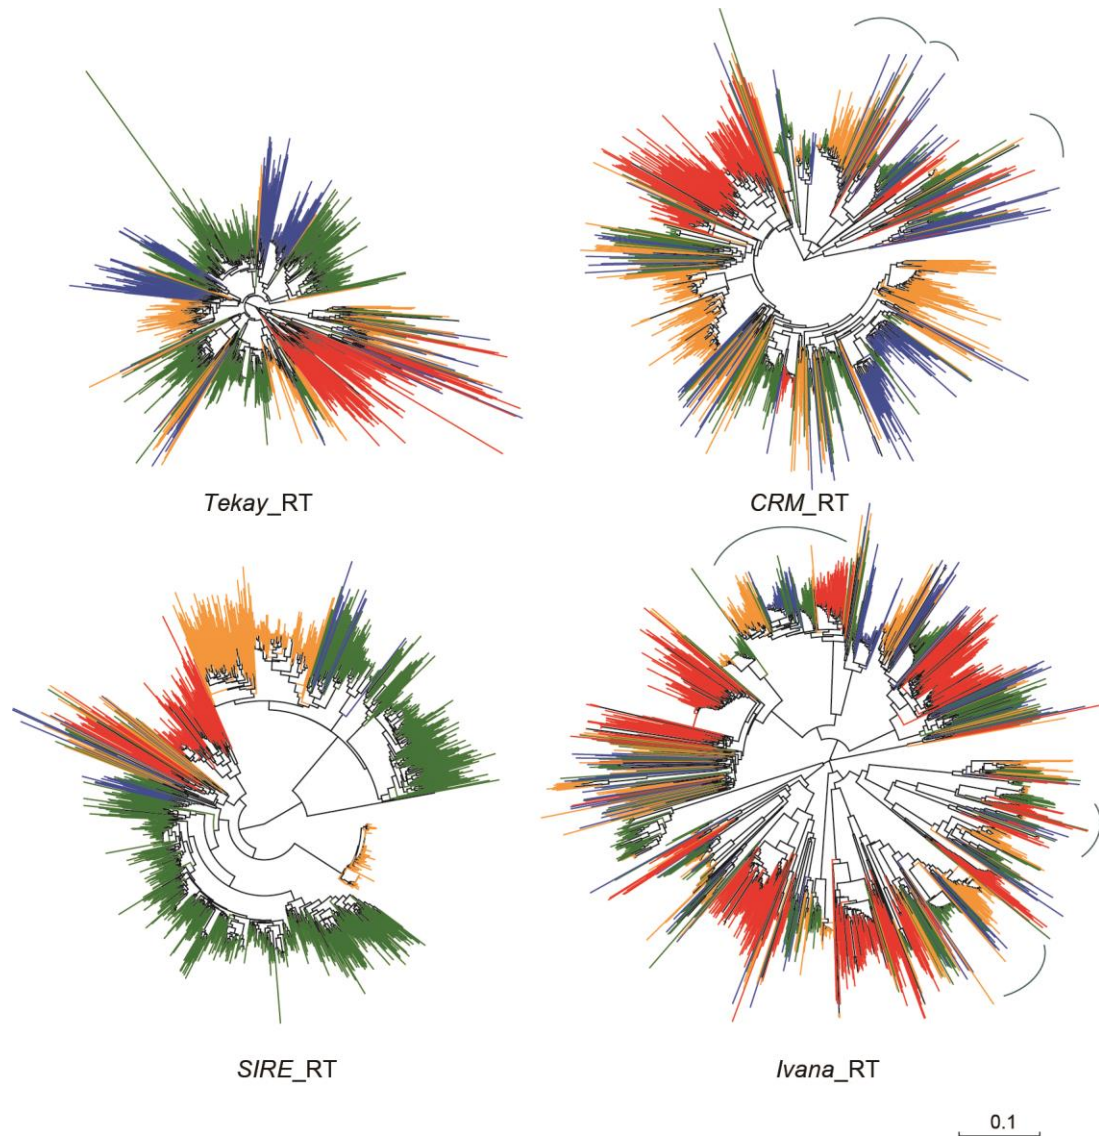

**Fig. S19** Neighbor-joining trees built from RT domain sequence similarities among different lineage-specific copies identified in *Begonia* genomes. *B. loranthoides*: red, *B. masoniana*: green, *B. darthvaderiana*: orange, *B. peltatifolia*: blue.

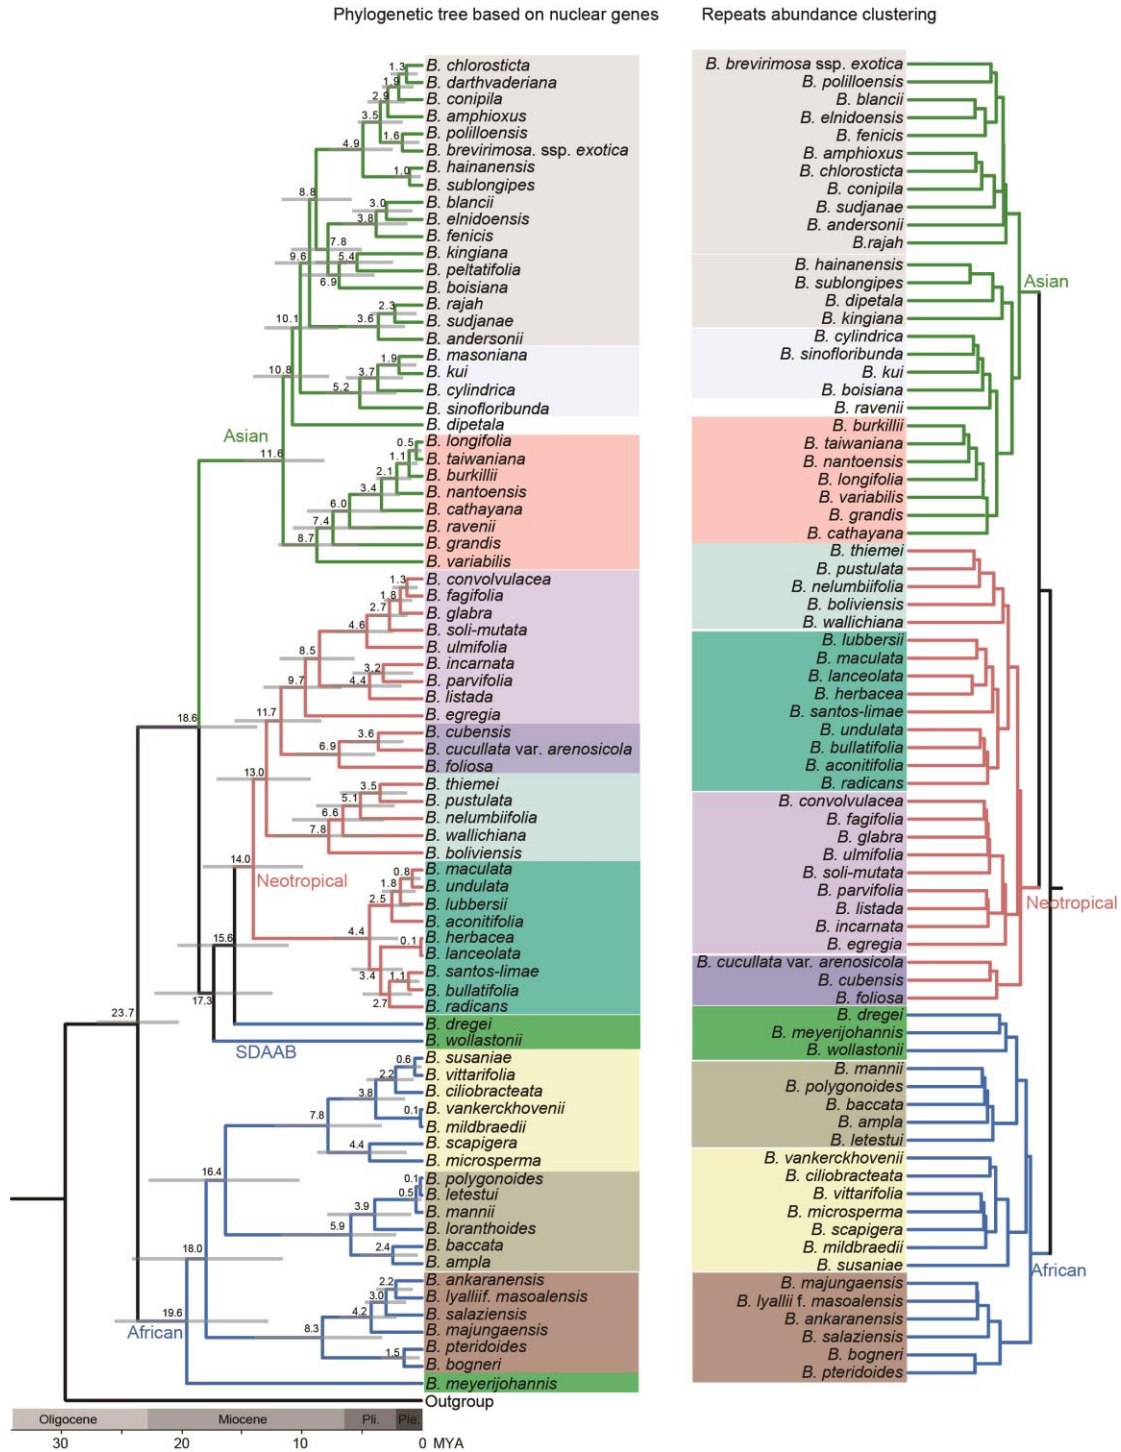

**Fig. S20 Comparison of nuclear ML tree and abundance clustering of TEs.** Clades of species found in both trees are colored the same.

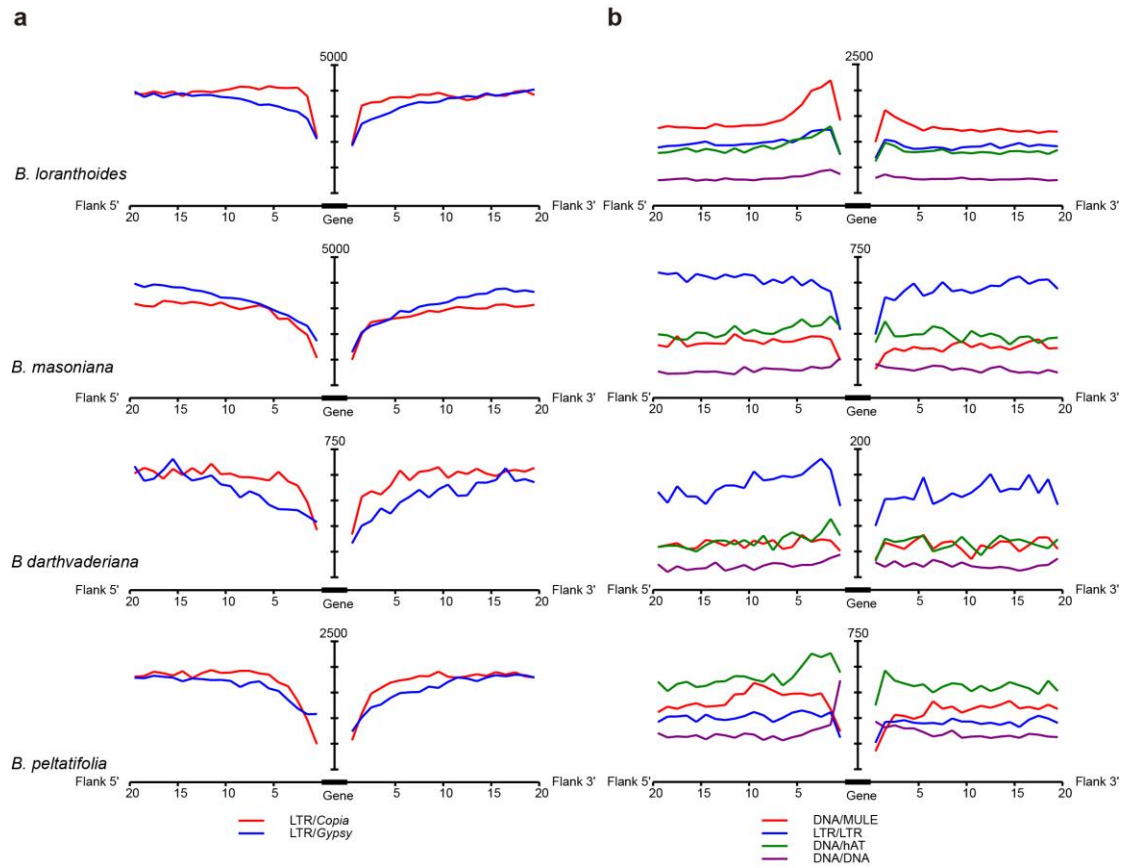

**Fig. S21 The TE landscape surrounding genes in four *Begonia* species.** For all genes, the 10 kb upstream of the TSS and 10 kb downstream of the TEs were analyzed. Abundance of the different TE families was compiled for all genes of each genome. **(a)** The distributions of superfamily *Copia* and *Gypsy* surrounding genes. **(b)** The distribution of TE family DNA/MULE, LTR/LTR, DNA/hAT and DNA/DNA surrounding genes.

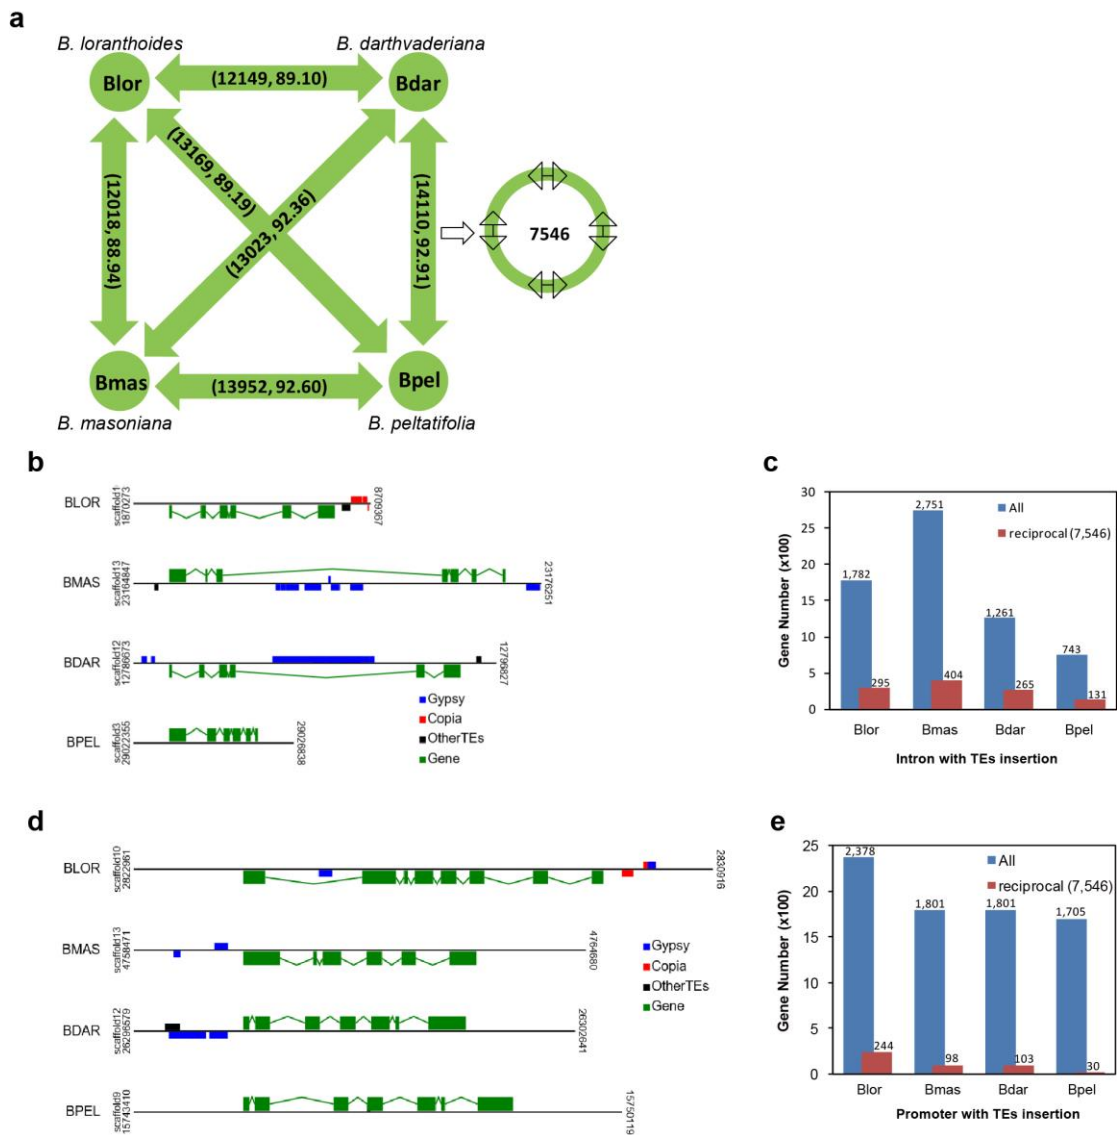

**Fig. S22 Impacts of TE insertions on the structure of introns and promoters. (a)** Schematic diagram showing the identification of 7,546 likely orthologs across four *Begonia* species by inter-comparisons. Numbers within the bracket: gene number, average homologous similarity. **(b)** A representative example showing differential insertions of TEs in the introns of orthologs. **(c)** Number of genes with TE insertions in introns. **(d)** An representative example showing different TE insertions on promoters of the ortholog among four *Begonia* species. **(e)** Number of genes with TE insertion in promoters.



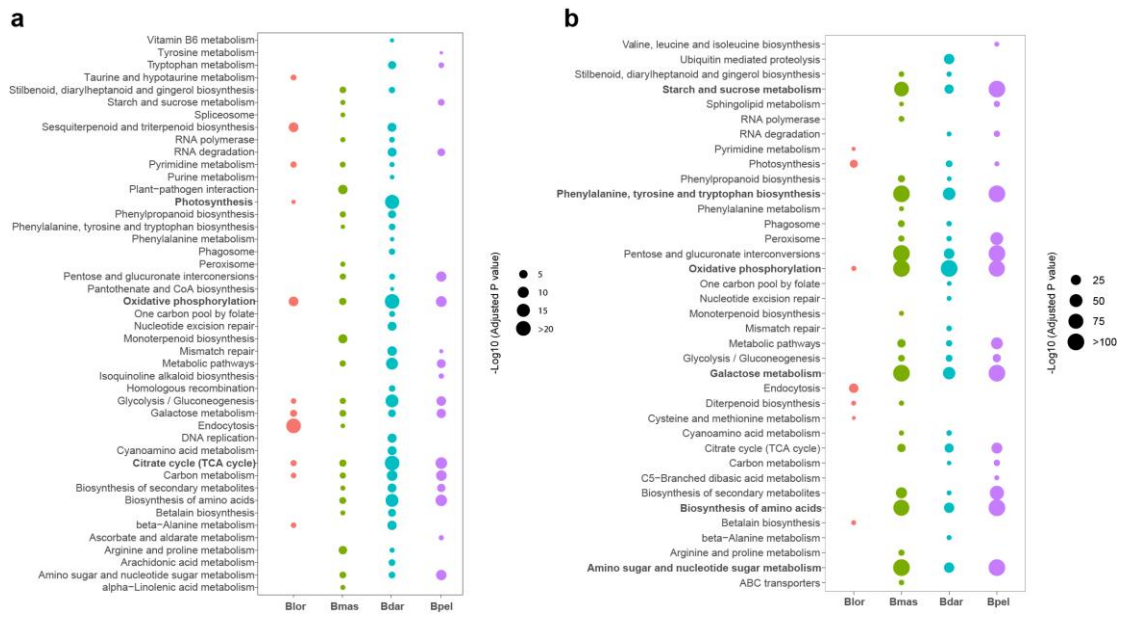

**Fig. S23 KEGG enrichment of genes with TE insertion either in introns or promoters. (a) Function enrichment of genes with TE insertion in introns. (b) Function enrichment of genes with TE insertion in promoters.**



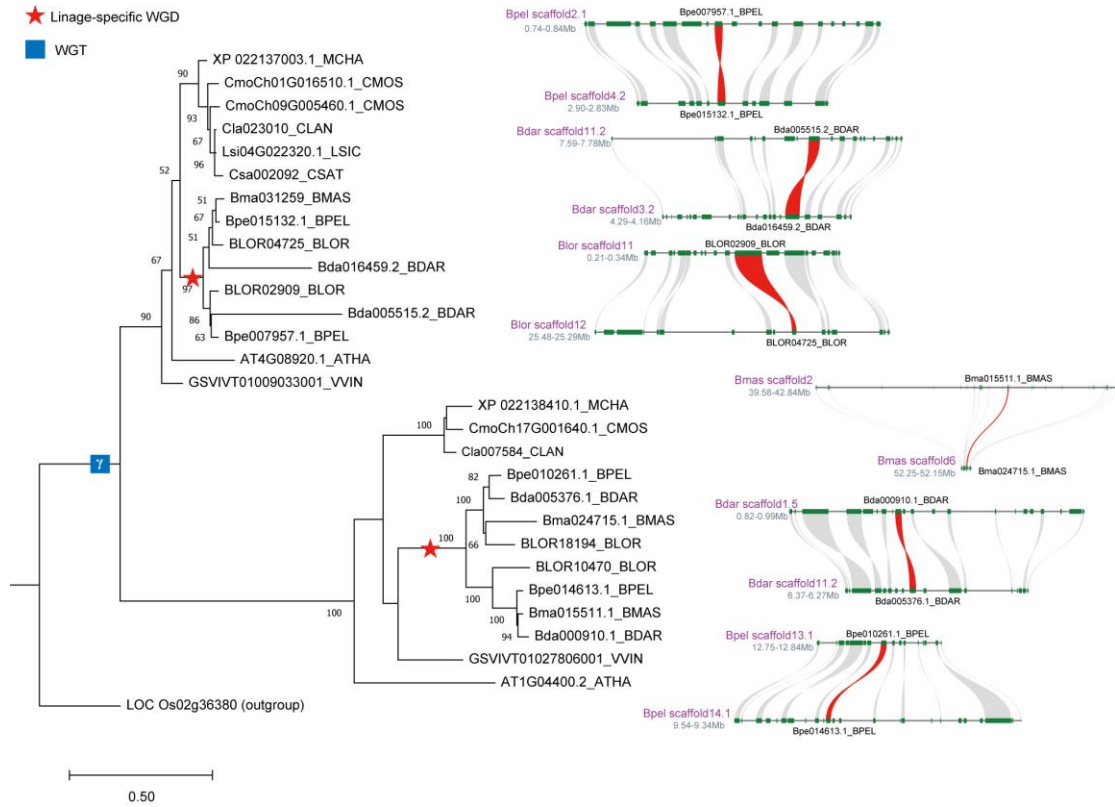

**Fig. S24 Expansion of crychromes (CRYs) genes in *Begonia* due to WGD.** The stars indicate the Begoniaceae specific WGD event. Syntenic blocks were placed on the right of the tree. Numbers on branches show the bootstrap supporting values. Species name abbreviations were indicated after the gene ID. VVIN, *Vitis vinifera*; MCHA, *Momordica charantia*; CMOS, *Cucurbita moschata*; CAST, *Cucumis sativus*; LSIC, *Lagenaria siceraria*; CLAN, *Citrullus lanatus*; ATHA, *Arabidopsis thaliana*; BLOR, *B. loranthoides*; BMAS, *B. masoniana*; BDAR, *B. darthvaderiana*; BPEL, *B. peltatifolia*. Same below.

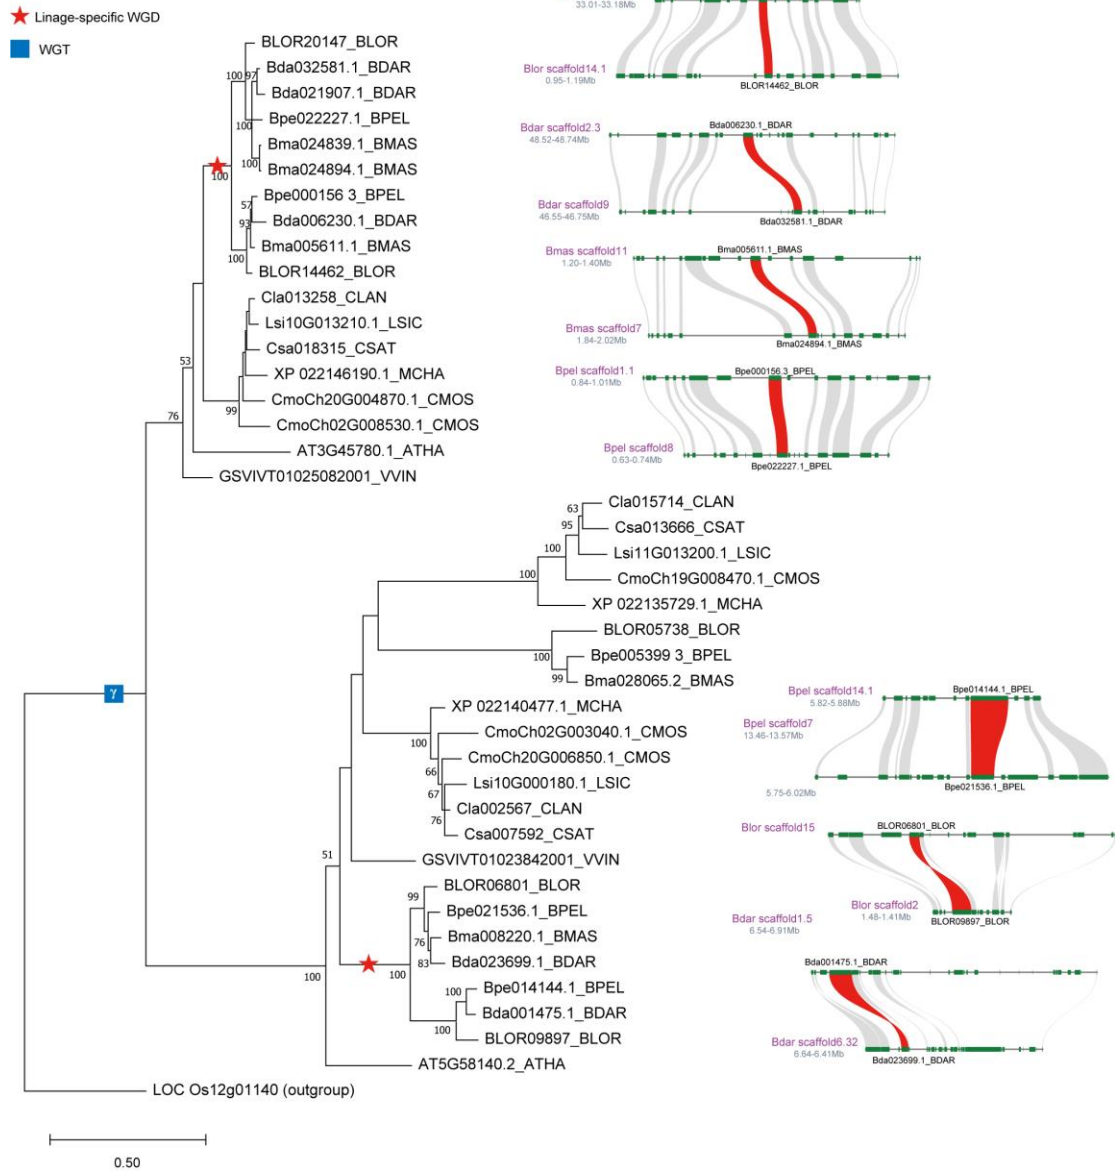

**Fig. S25 Expansion of Phototropin (PHOT) genes in *Begonia* due to WGD.** The stars indicate the Begoniaceae specific WGD event. Syntenic blocks were placed on the right of the tree. Numbers on branches show the bootstrap supporting values.

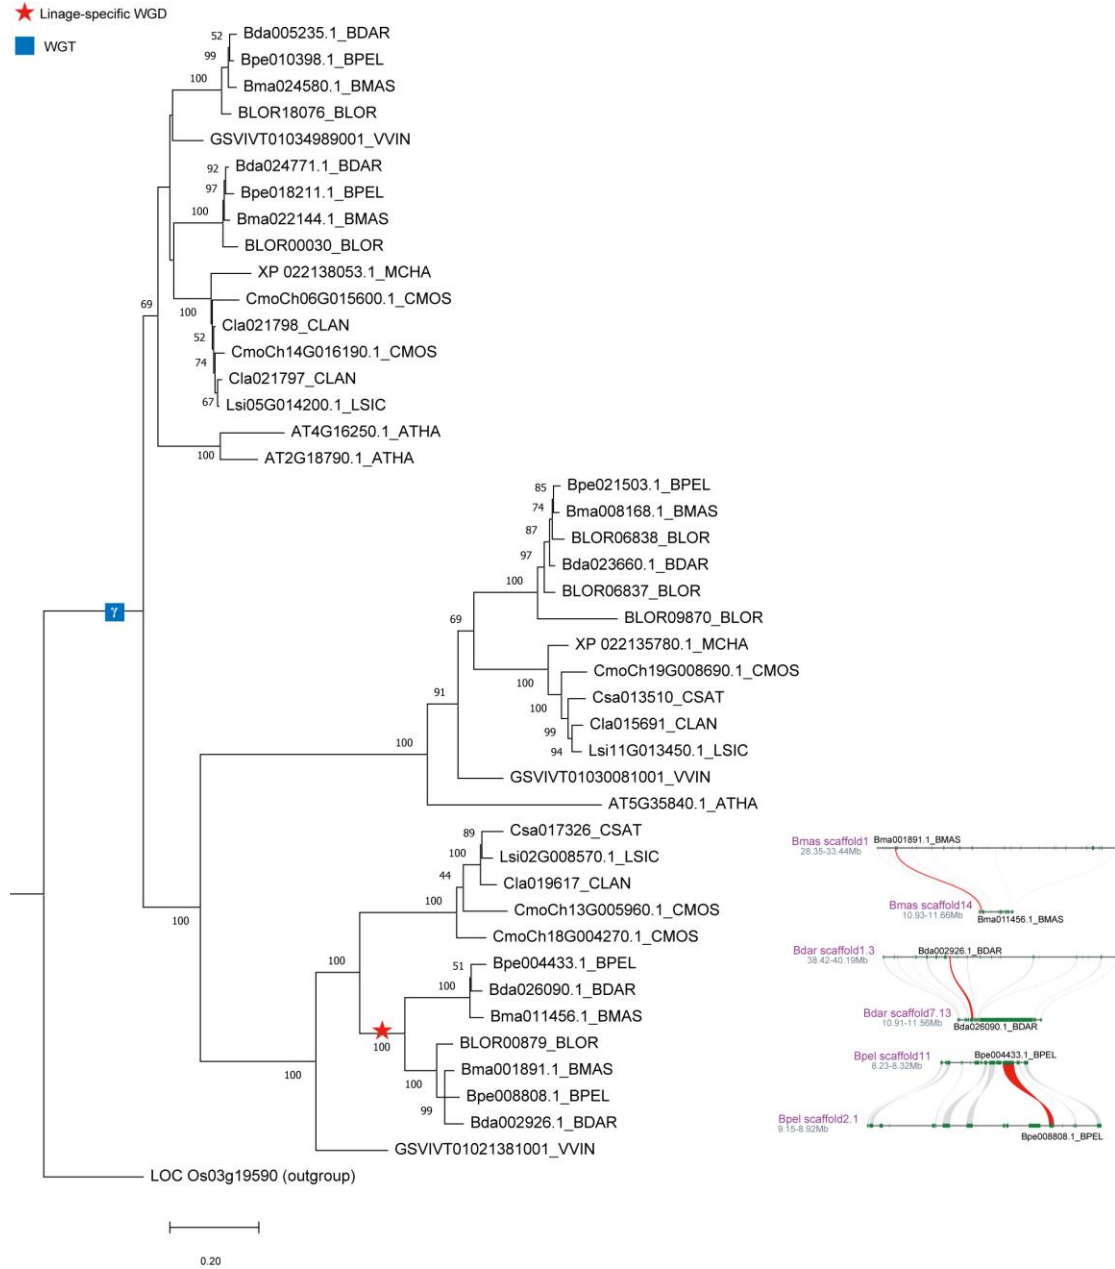

**Fig. S26 Expansion of Phytochrome (PHY) genes in *Begonia* due to WGD.** The stars indicate the Begoniaceae specific WGD event. Syntenic blocks were placed on the right of the tree. Numbers on branches show the bootstrap supporting values.

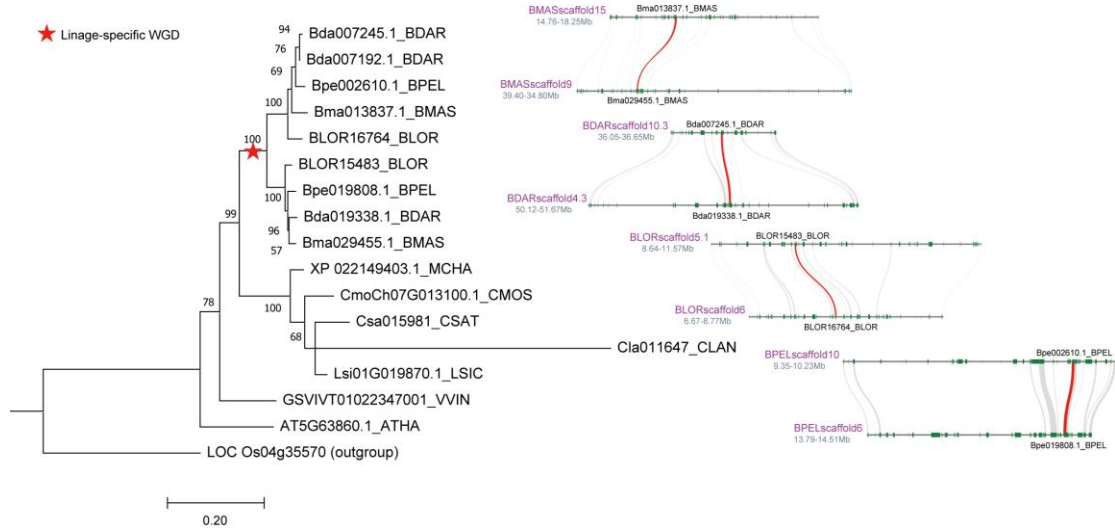

**Fig. S27 Expansion of UV Resistance Locus 8 (UVR8) genes in *Begonia* due to WGD.** The star indicates the Begoniaceae specific WGD event. Syntenic blocks were placed on the right of the tree. Numbers on branches show the bootstrap supporting values.

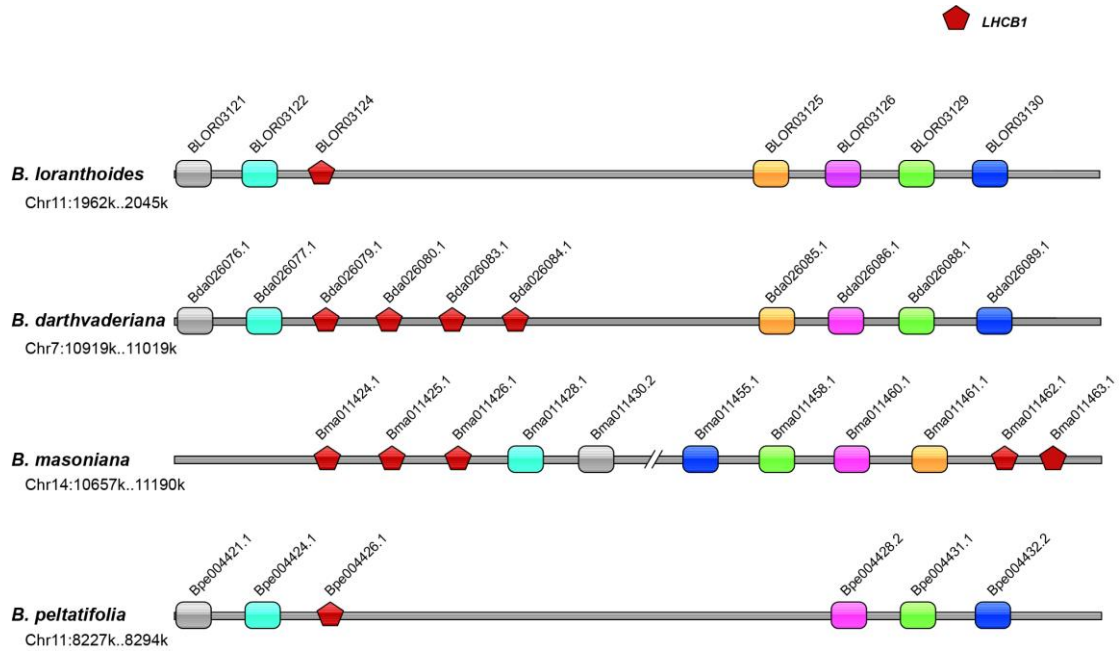

**Fig. S28** Schematic diagrams show tandem duplication of LHCb1 genes in *B. masoniana* and *B. darthvaderiana*. The syntenic genes are indicated as same boxes.

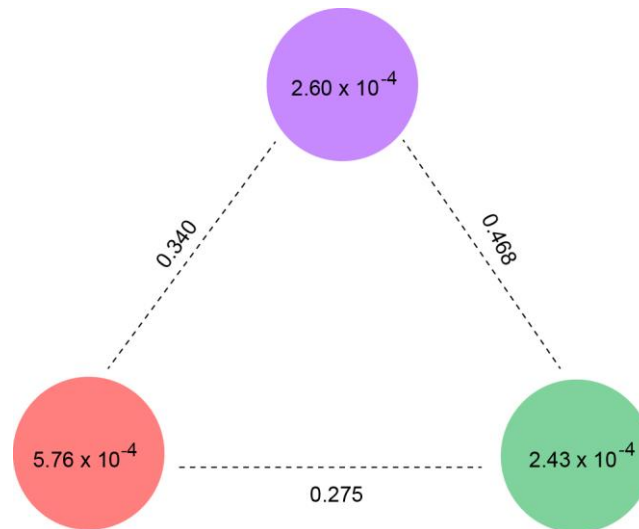

**Fig. S29** Nucleotide diversity ( $\pi$ ) and population divergence ( $F_{ST}$ ) across the three major groups of *Begonia*. Purple, African group; red, Neotropical group; green, Asian group. The value in each circle represents a measure of nucleotide diversity for this group, and the value on each line indicates the population divergence between the two groups.

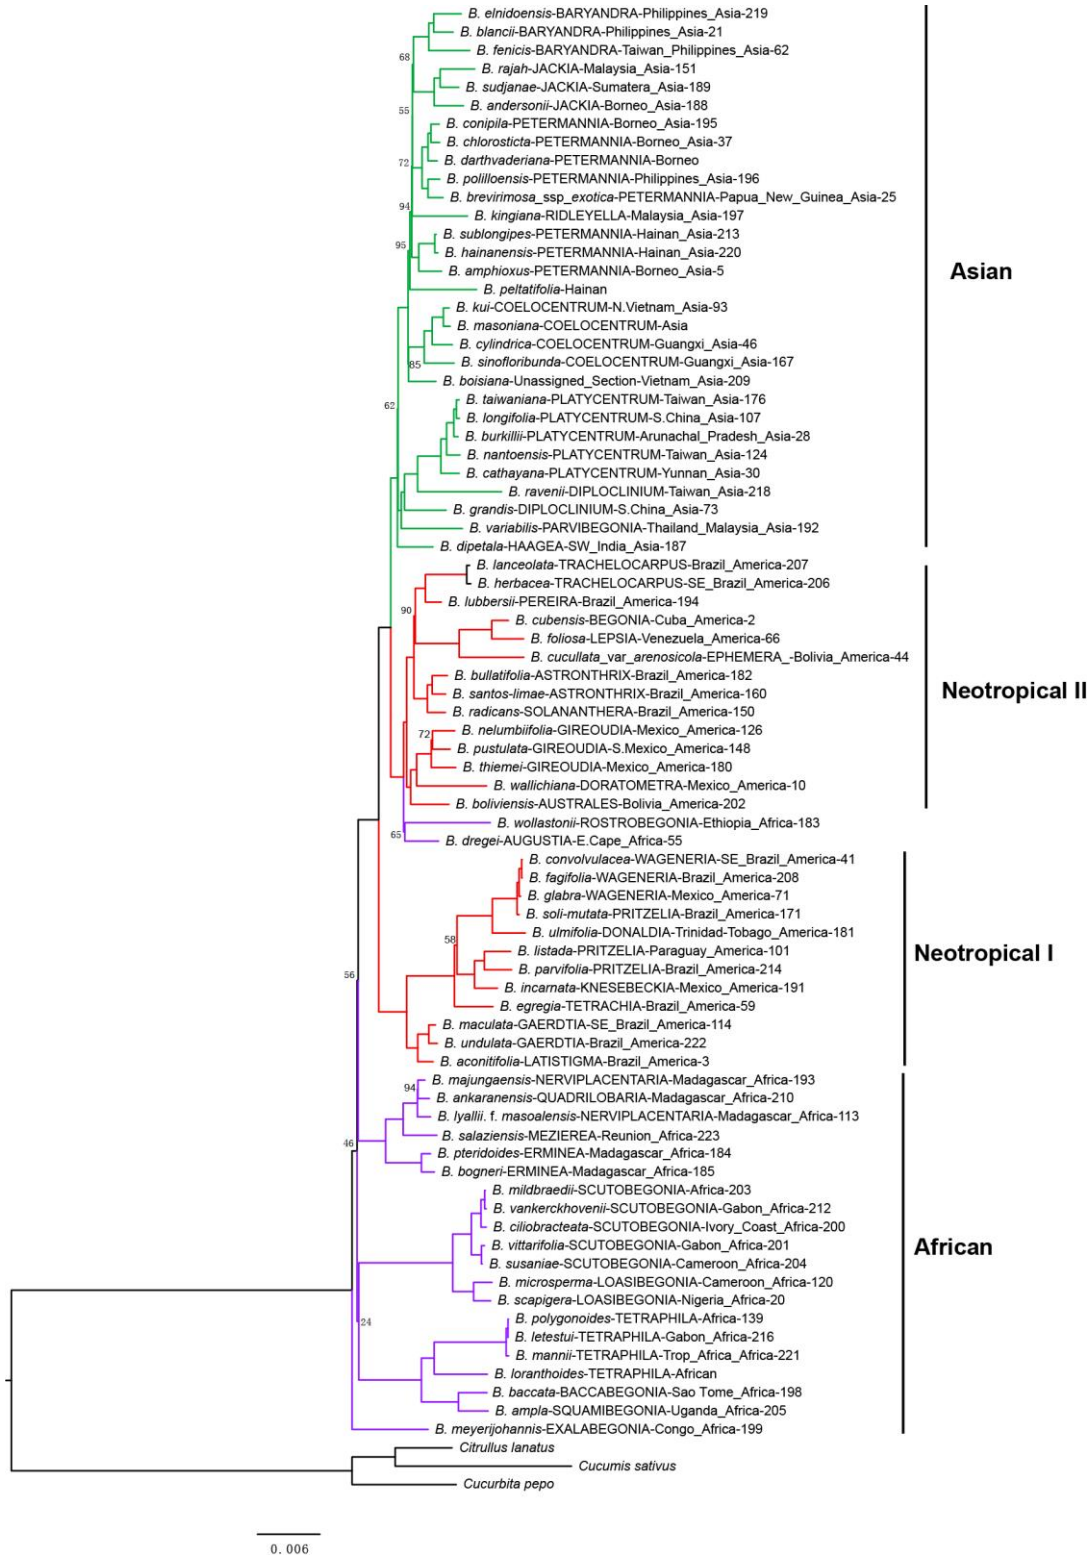

**Fig. S30** Maximum likelihood tree inferred from concatenated nucleotide sequences of *Begonia* plastid protein coding genes using RAXML. Branches are maximally supported unless otherwise indicated. Branches leading to African, Neotropical, and Asia accessions are indicated in purple, red, and green, respectively. Three species (*Citrullus lanatus*, *Cucumis sativus*, *Cucurbita pepo*) of Cucurbitaceae were used as outgroups.



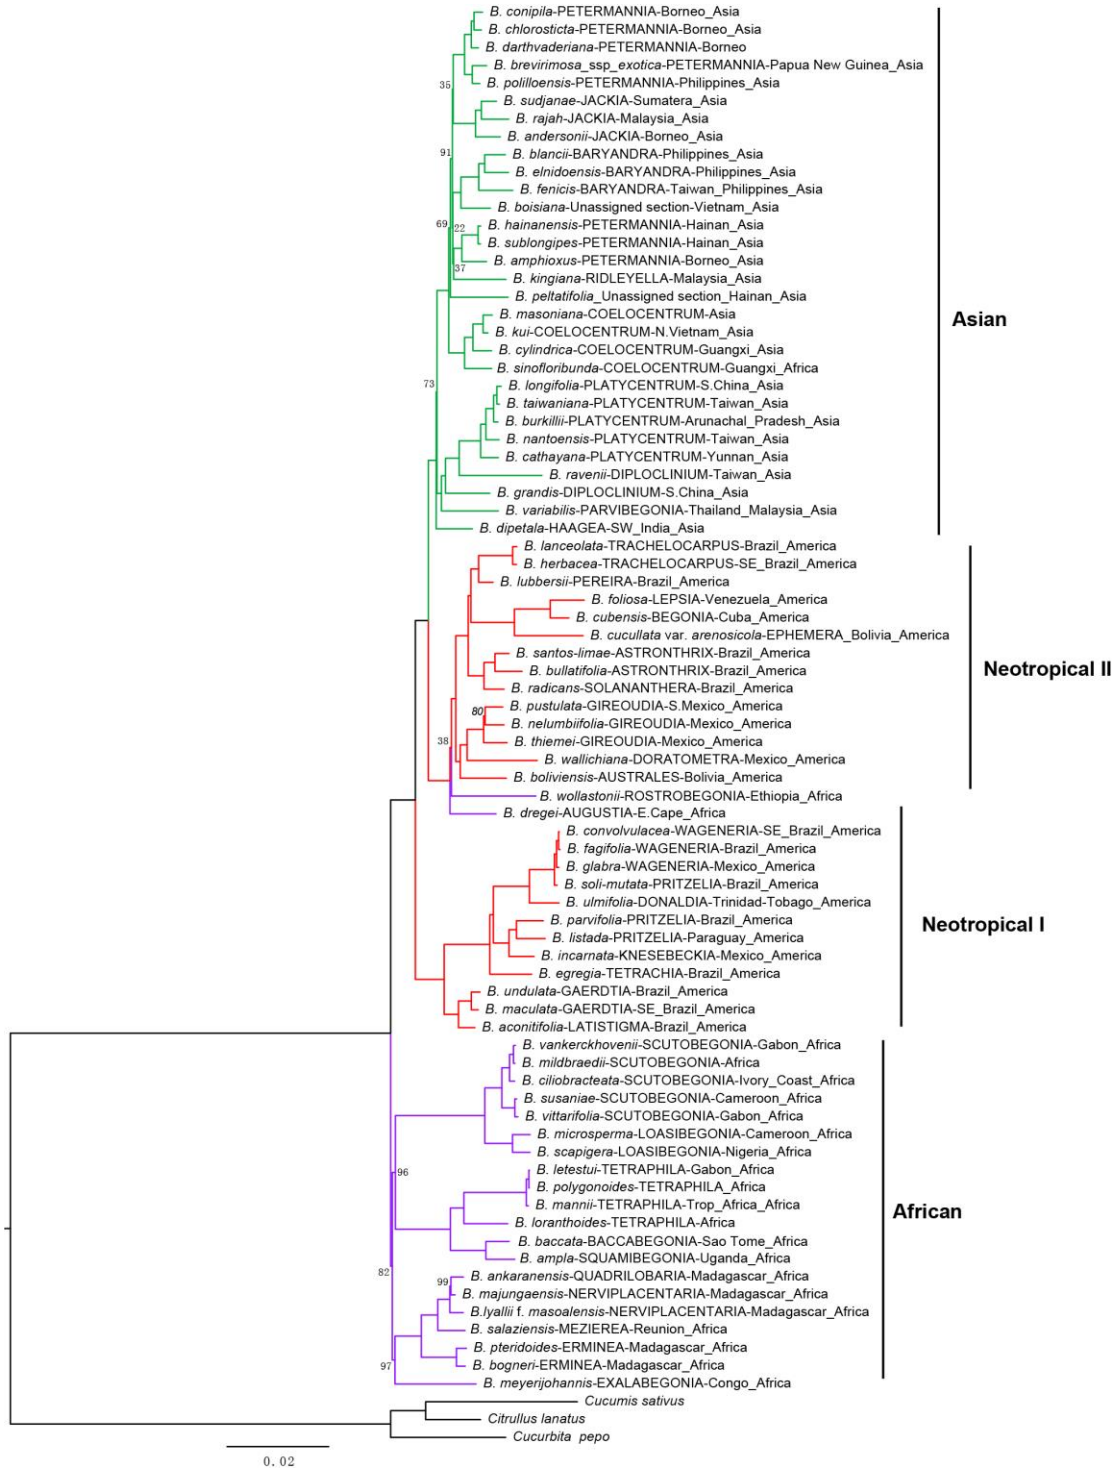

**Fig. S31** Maximum likelihood tree inferred from *Begonia* plastome nucleotide alignment of 156,131 bp using RAxML. Branches are maximally supported unless otherwise indicated. Branches leading to African, Neotropical, and Asia accessions are indicated in purple, red, and green, respectively. Three species (*Citrullus lanatus*, *Cucumis sativus*, *Cucurbita pepo*) of Cucurbitaceae were used as outgroups.

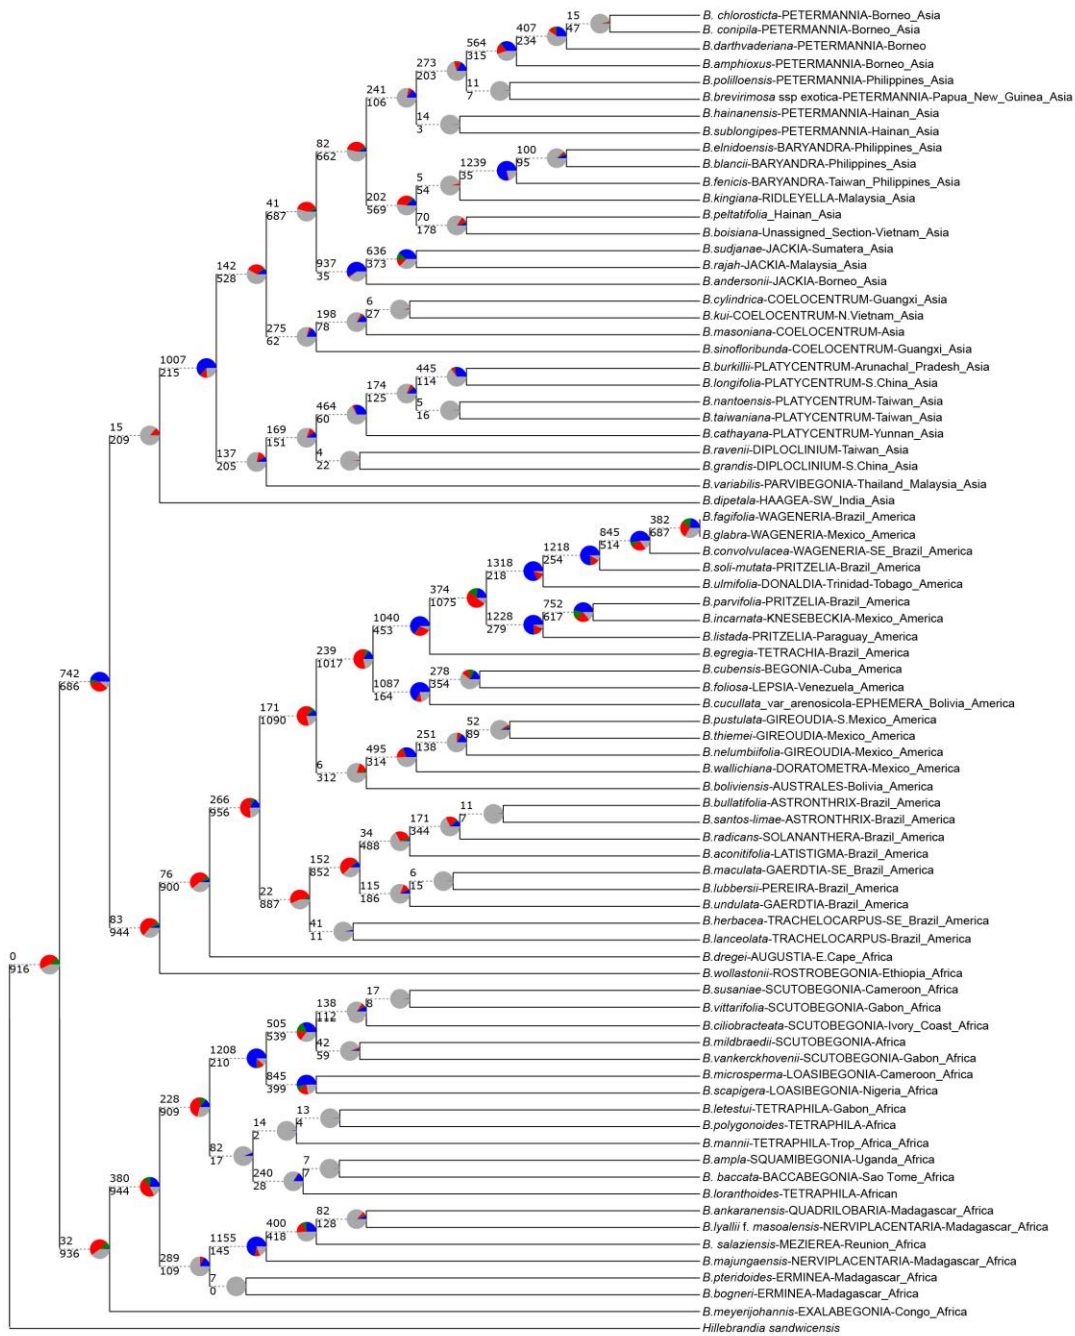

**Fig. S32** Maximum likelihood tree inferred from a concatenated dataset of 1,604 nuclear genes using IQtree with individual gene trees mapped. Four colors of the pie chart: concordance (blue), top conflict that supporting a single main alternative topology (green), other conflicts that supporting various alternative topologies (red), no signal (gray). *Hillebrandia sandwicensis* was used as outgroup.

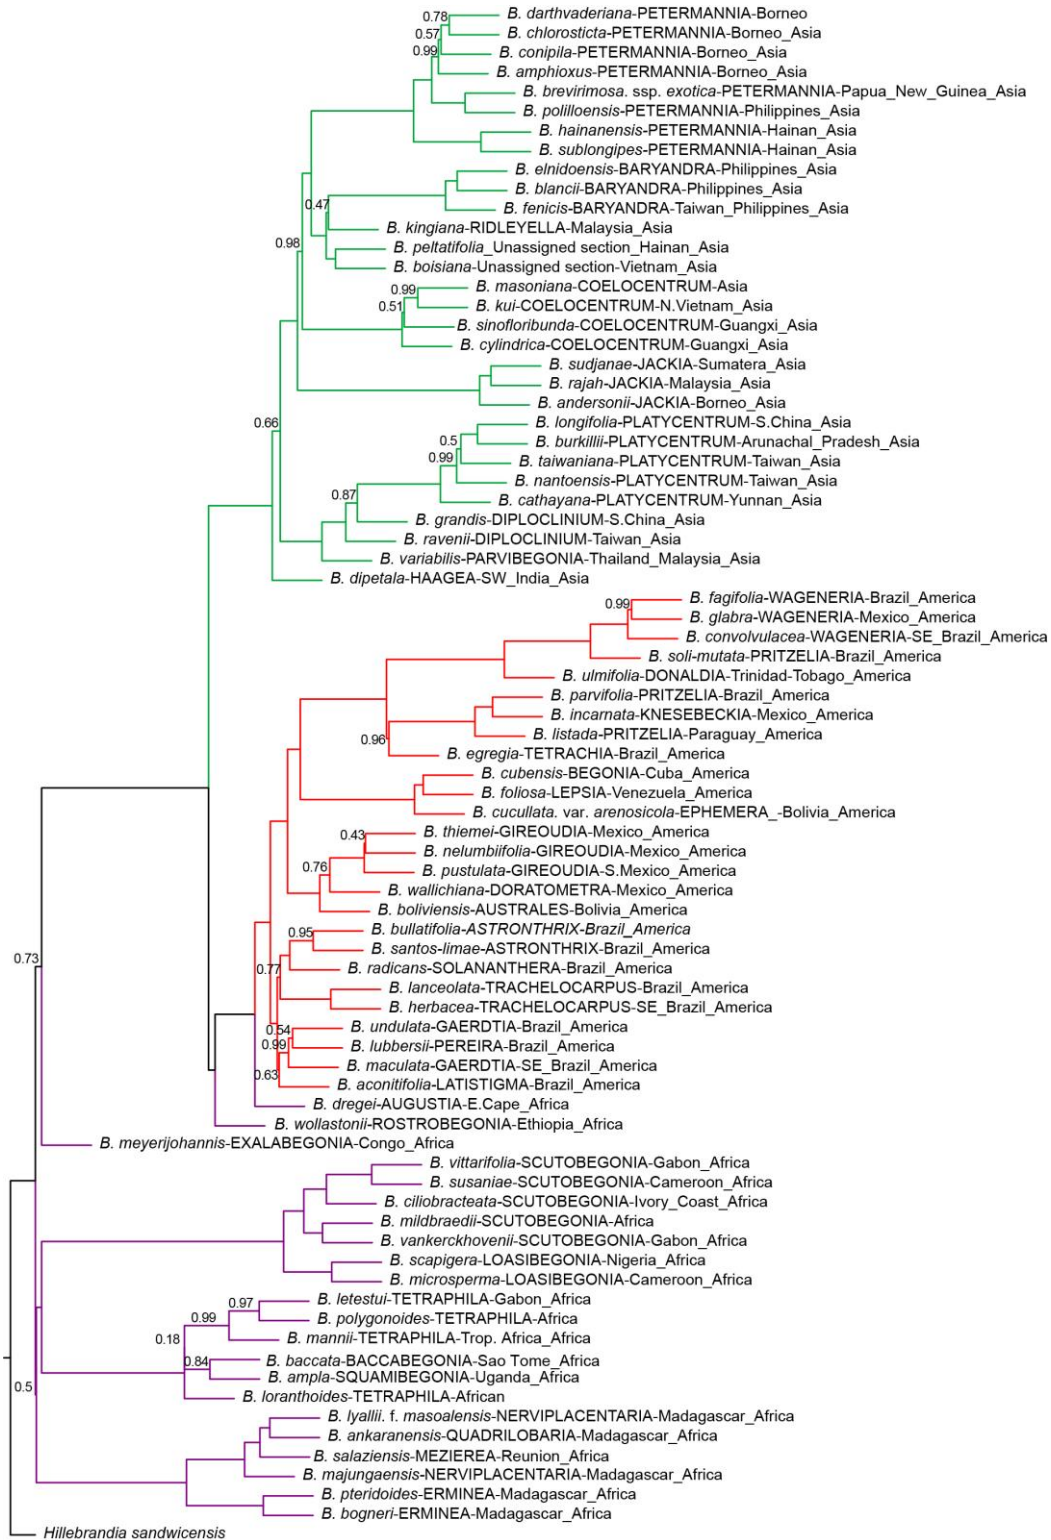

2.0

**Fig. S33** Coalescent super tree inferred with ASTRAL-III using 1,604 nuclear single gene trees. Branches are maximally supported unless otherwise indicated. Branches leading to African, Neotropical, and Asian accessions are indicated in purple, red, and green, respectively. *Hillebrandia sandwicensis* was used as outgroup.

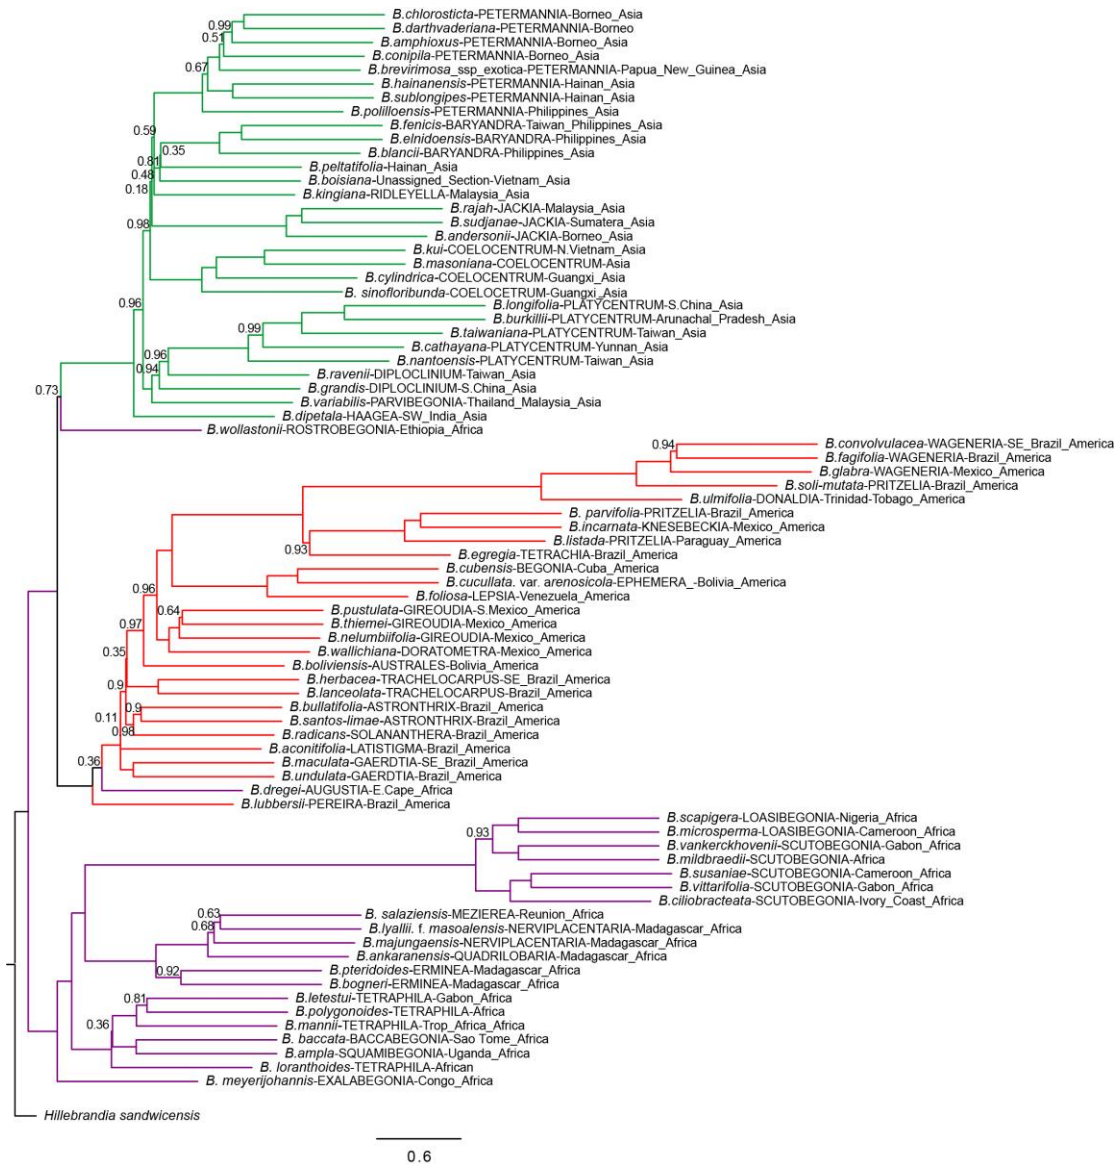

**Fig. S34** Coalescent super tree inferred with ASTRAL-III using SNPs in 1,343 nuclear single gene trees. Branches are maximally supported unless otherwise indicated. Branches leading to African, Neotropical, and Asian accessions are indicated in purple, red, and green, respectively. *Hillebrandia sandwicensis* was used as outgroup.



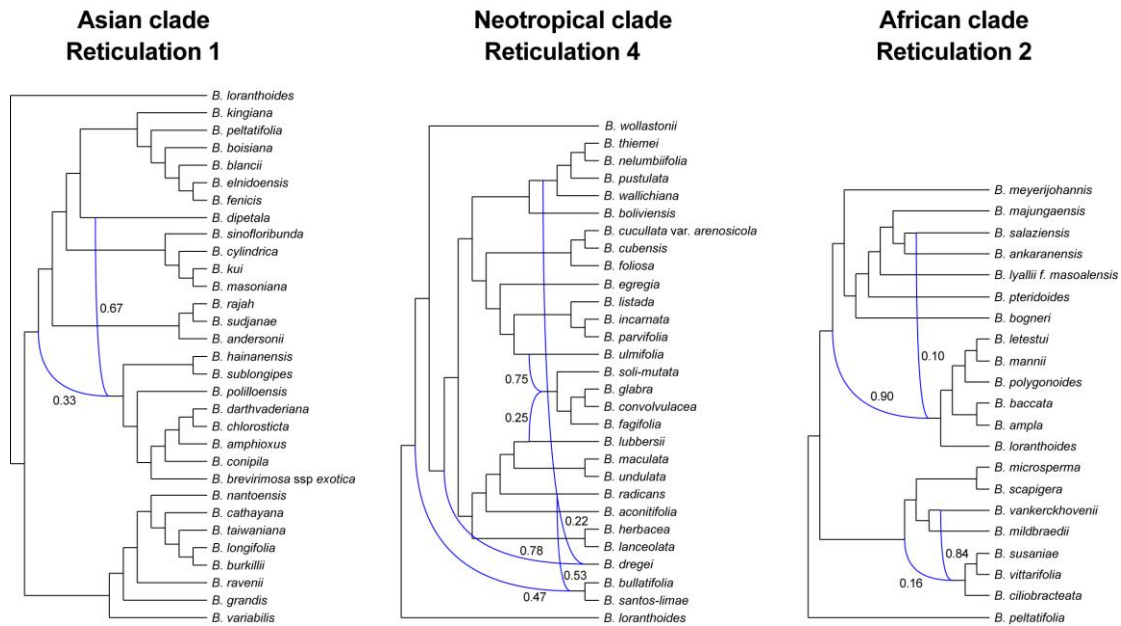

**Fig. S35 Phylonet network results for three geographically delimited *Begonia* clades.** Only the reticulation with best Log probability is shown. For compromise of the computational burden, we split the *Begonia* phylogeny into three geographically delimited *Begonia* clades. For each of the three analyses, we first inferred the species trees with IQtree with the SNP datasets for the single copy gene region, with a minimum sequence length of 100 bp and minimum taxa occupancy of 75%. The individual gene trees finally used are 548, 548, 661 for Asian, Neotropical, and African datasets, respectively. The option of InferNetwork\_MPL option as implemented in Phylonet is used to infer the species network for each *Begonia* clade with reticulations from 1 to 10. Blue curved lines indicate lineages involved in reticulated histories, and numerical values are the inheritance probabilities for each reticulation.

**Table S1 Summary of 78 *Begonia* species for whole genome shot gun sequencing.**  
(See separate Excel file)

**Table S2 Genome size estimation based on K-mer analysis.**

| <b>Species</b>           | <b>K</b> | <b>Kmer<br/>Number<br/>(D&gt;5)</b> | <b>Peak Depth</b> | <b>Genome Size</b> |
|--------------------------|----------|-------------------------------------|-------------------|--------------------|
| <i>B. loranthoides</i>   | 21       | 18,827,386,084                      | 26                | 724,130,234        |
| <i>B. masoniana</i>      | 21       | 29,818,513,231                      | 37                | 805,905,763        |
| <i>B. darthvaderiana</i> | 21       | 29,490,349,982                      | 37                | 797,036,486        |
| <i>B. peltatifolia</i>   | 21       | 8,733,478,350                       | 25                | 349,339,134        |



**Table S3 Summary of within-genome heterozygosity of the four *Begonia* species.**

| <b>Species</b>           | <b>SNP/Indel</b> | <b>Total</b> | <b>Heterozygosity rate</b> |
|--------------------------|------------------|--------------|----------------------------|
| <i>B. loranthoides</i>   | SNP              | 1,216,560    | 0.17%                      |
|                          | Indel            | 124,674      | 0.02%                      |
| <i>B. masoniana</i>      | SNP              | 7,159,899    | 0.90%                      |
|                          | Indel            | 490,247      | 0.06%                      |
| <i>B. darthvaderiana</i> | SNP              | 7,229,727    | 0.92%                      |
|                          | Indel            | 124,674      | 0.06%                      |
| <i>B. peltatifolia</i>   | SNP              | 791,618      | 0.24%                      |
|                          | Indel            | 97,889       | 0.03%                      |

**Table S4 Statistics of genome assemblies.**

| Data, Method                                | Statistical level: scaffold;<br>contig (bp) | <i>B. loranthoides</i>      | <i>B. masoniana</i>         | <i>B. darthvaderiana</i>    | <i>B. peltatifolia</i>      |
|---------------------------------------------|---------------------------------------------|-----------------------------|-----------------------------|-----------------------------|-----------------------------|
|                                             |                                             | >500; >500                  | >500; >500                  | >500; >500                  | >500; >500                  |
| 10 × genomics,<br>Supernova                 | Total number (>)                            | 24,414; 35,341              | 110,753; 138,701            | 143,516; 175,652            | 10,658; 15,403              |
|                                             | Total length of (bp)                        | 716,442,159;<br>688,788,849 | 970,512,287;<br>872,750,467 | 911,958,493;<br>858,665,223 | 334,086,415;<br>327,069,085 |
|                                             | Gap number (bp)                             | 27,653,310; 0               | 97,761,820; 0               | 53,293,270; 0               | 7,017,330; 0                |
|                                             | N50 Length (bp)                             | 6,733,575; 85,570           | 94,737; 14,943              | 28,284; 12,997              | 3,195,172; 99,958           |
|                                             | N90 Length (bp)                             | 23,247; 10,987              | 3,619; 2,913                | 2,367; 1,947                | 19,640; 11,883              |
|                                             | GC content is (%)                           | 36.36; 36.36                | 38.71; 38.71                | 39.10; 39.10                | 37.95; 37.95                |
| stLFR, Supernova                            | Total number (>)                            | 29,152; 60,975              | 85,695; 112,802             | 152,286; 195,010            | 17,321; 36,693              |
|                                             | Total length of (bp)                        | 709,239,016;<br>688,839,198 | 779,204,818;<br>725,100,878 | 770,494,047;<br>730,575,457 | 317,378,019;<br>302,287,307 |
|                                             | Gap number (%)                              | 2.88; 0                     | 6.94; 0                     | 5.18; 0                     | 4.75; 0                     |
|                                             | N50 Length (bp)                             | 3,091,820; 81,434           | 98,101; 15,260              | 35,285; 13,869              | 2,492,536; 87,395           |
|                                             | N90 Length (bp)                             | 23,260; 14,246              | 3,843; 3,039                | 1,501; 1,157                | 15,383; 12,958              |
|                                             | GC content is (%)                           | 36.23; 36.23                | 38.81; 38.81                | 39.64; 39.64                | 37.67; 37.67                |
| PacBio, Canu +<br>polish x 2 + pilon x<br>2 | Total number (>)                            | -                           | 5,230; 5,230                | 6,499; 6,499                | -                           |
|                                             | Total length of (bp)                        | -                           | 799,391,915;<br>799,391,915 | 771,667,536;<br>771,667,536 | -                           |
|                                             | Gap number (%)                              | -                           | 0; 0                        | 0; 0                        | -                           |
|                                             | N50 Length (bp)                             | -                           | 436,440; 436,440            | 315,740; 315,740            | -                           |
|                                             | N90 Length (bp)                             | -                           | 74,251; 74,251              | 53,413; 53,413              | -                           |
|                                             | GC content is (%)                           | -                           | 38.46; 38.46                | 38.22; 38.22                | -                           |

|                                               |                                    |                             |                             |                             |                             |
|-----------------------------------------------|------------------------------------|-----------------------------|-----------------------------|-----------------------------|-----------------------------|
| Compare &<br>redundans & Merge<br>& Gapcloser | Total number (>)                   | 23,193; 33,220              | 5,282; 5,334                | 6,563; 6,628                | 10,764; 15,711              |
|                                               | Total length of (bp)               | 723,606,580;<br>702,564,625 | 807,385,834;<br>805,379,753 | 791,918,214;<br>789,758,988 | 337,427,279;<br>333,610,466 |
|                                               | Gap number (%)                     | 2.91; 0                     | 0.025; 0                    | 0.027; 0                    | 1.13; 0                     |
|                                               | N50 Length (bp)                    | 6,800,910; 87,281           | 440,804; 445,168            | 326,801; 330,037            | 3,227,123; 101,957          |
|                                               | N90 Length (bp)                    | 23,479; 11,206              | 74,993; 75,736              | 55,085; 55,630              | 19,836; 12,120              |
|                                               | GC content is (%)                  | 36.16; 36.16                | 38.56; 38.56                | 38.46; 38.46                | 37.95; 37.95                |
|                                               | HiC, Hi-C Pro +<br>Juicer + 3d-dna | Total number (>)            | 16,467; 24,158              | 885; 5,230                  | 1,787; 6,499                |
| Total length of (bp)                          |                                    | 707,542,179;<br>685,045,514 | 799,826,415;<br>799,391,915 | 786,433,440;<br>784,077,440 | 331,750,784;<br>324,756,934 |
| Gap number (%)                                |                                    | 3.18; 0                     | 0.05; 0                     | 0.3; 0                      | 2.11; 0                     |
| N50 Length (bp)                               |                                    | 30,629,287; 131,011         | 52,515,067; 436,440         | 54,626,122; 323,566         | 18,565,976; 98,064          |
| N90 Length (bp)                               |                                    | 37,644; 15,109              | 45,922,387; 74,251          | 33,716,155; 54,540          | 25,000; 12,864              |
| GC content is (%)                             |                                    | 36.36; 36.36                | 38.46; 38.46                | 38.26; 38.26                | 37.92; 37.92                |
| Complete BUSCOs                               |                                    | 97.00%                      | 91.00%                      | 92.20%                      | 96.80%                      |

**Table S5 Global statistics of genome assembly and annotation of four *Begonia* species.**

| Species<br>Type                 | <i>B. loranthoides</i> |             | <i>B. masoniana</i> |             | <i>B. darthvaderiana</i> |             | <i>B. peltatifolia</i> |             |
|---------------------------------|------------------------|-------------|---------------------|-------------|--------------------------|-------------|------------------------|-------------|
|                                 | Number                 | Size        | Number              | Size        | Number                   | Size        | Number                 | Size        |
| <b>Assembly feature</b>         |                        |             |                     |             |                          |             |                        |             |
| Total scaffolds                 | 16,502                 | 707.55 Mb   | 885                 | 799.83 Mb   | 1,787                    | 786.43 Mb   | 7,169                  | 331.75 Mb   |
| Undetermined bases              | -                      | 22.50 Mb    | -                   | 0.43 Mb     | -                        | 2.36 Mb     | -                      | 6.99 Mb     |
| Scaffold N50                    | 9                      | 33.31 Mb    | 7                   | 52.52 Mb    | 6                        | 54.63 Mb    | 7                      | 20.51 Mb    |
| Longest scaffold                | -                      | 57.64 Mb    | -                   | 84.93 Mb    | -                        | 89.91 Mb    | -                      | 42.45 Mb    |
| GC content %                    | -                      | 35.20       | -                   | 38.44       | -                        | 38.15       | -                      | 37.12       |
| BUSCOs: complete; partial %     | -                      | 97.00; 0.80 | -                   | 91.00; 2.50 | -                        | 92.20; 1.50 | -                      | 96.80; 1.20 |
| Pseudochromosomes               | 19                     | 626.55 Mb   | 15                  | 790.47 Mb   | 15                       | 767.14Mb    | 15                     | 289.05 Mb   |
| % of Pseudochromosomes          | -                      | 88.55       | -                   | 98.83       | -                        | 97.55       | -                      | 87.13       |
| <b>Genome annotation</b>        |                        |             |                     |             |                          |             |                        |             |
| Repetitive sequences %          | -                      | 66.52       | -                   | 68.40       | -                        | 70.33       | -                      | 51.47       |
| Protein-coding genes            | 22,059                 | 31.10 Mb    | 22,861              | 26.01 Mb    | 23,444                   | 26.79 Mb    | 23,010                 | 27.19 Mb    |
| Gene density (genes per Mb)     | -                      | 31          | -                   | 28          | -                        | 29          | -                      | 69          |
| Genes in pseudochromosomes      | 20,077                 | 29.01 Mb    | 22,731              | 25.93 Mb    | 22,831                   | 26.39 Mb    | 19,834                 | 24.93 Mb    |
| % of Genes in pseudochromosomes | 91.02                  | 93.29       | 99.43               | 99.68       | 97.39                    | 98.51       | 86.2                   | 91.69       |
| Mean gene size (bp)             | -                      | 4307.81     | -                   | 3255.96     | -                        | 2928.33     | -                      | 2790.40     |
| Mean CDS size (bp)              | -                      | 1409.91     | -                   | 1137.71     | -                        | 1142.63     | -                      | 1181.81     |
| Number of exons                 | 134,601                | -           | 111,124             | -           | 112,564                  | -           | 112,484                | -           |
| Mean exon size (bp)             | -                      | 231.06      | -                   | 234.05      | -                        | 237.98      | -                      | 139         |
| Mean number of exons per gene   | 6.10                   | -           | 4.86                | -           | 4.80                     | -           | 4.89                   | -           |
| Number of introns               | 112,542                | -           | 88,263              | -           | 89,120                   | -           | 89,474                 | -           |
| Mean intron size (bp)           | -                      | 568.01      | -                   | 548.65      | -                        | 469.75      | -                      | 413.68      |

**Table S6 Statistics of raw data for whole genome sequencing and RNA-seq.**

|       |         | Tissue           | Male/Female | <i>B. loranthoides</i> | <i>B. masoniana</i> | <i>B. darthvaderiana</i> | <i>B. peltatifolia</i> |       |
|-------|---------|------------------|-------------|------------------------|---------------------|--------------------------|------------------------|-------|
| WGS   | 10 ×    | leaf             | -           | 184.87                 | 181.09              | 199.34                   | 184.72                 |       |
|       | HiC     | leaf             | -           | 148.32                 | 153.92              | 125.58                   | 138.09                 |       |
|       | stLFR   | leaf             | -           | 169.17                 | 151.08              | 157.52                   | 161.53                 |       |
|       | PacBio  | leaf             | -           | -                      | 45.38               | 48.23                    | -                      |       |
| Total |         |                  |             | 502.36                 | 531.48              | 530.67                   | 484.34                 |       |
| RNA   | RNA-seq | root             | -           | -                      | -                   | 5.12                     | 27.92                  |       |
|       |         | Stem/<br>rhizome | -           | 6.20                   | -                   | 6.26                     | 31.68                  |       |
|       |         | flower           | male        | -                      | -                   | 7.90                     | -                      | -     |
|       |         |                  | female      | -                      | -                   | 10.06                    | -                      | 34.17 |
|       |         | peduncle         | -           | -                      | -                   | -                        | -                      | 18.25 |
|       |         | leaf             | -           | 5.56                   | 5.38                | 11.80                    | 21.83                  |       |
| Total |         |                  |             | 11.76                  | 23.34               | 23.18                    | 133.85                 |       |

**Note:** For all data, the unit is Gb.

**Table S7 Statistics of reads mapping to genome sequences for RNA-seq data from different tissues for four *Begonia* species.**

| <b>Tissue</b>                  | <b>Total Mapped Reads</b> | <b>Perfect Match</b> | <b>Unique Match</b> | <b>Total Unmapped Reads</b> |
|--------------------------------|---------------------------|----------------------|---------------------|-----------------------------|
| <b><i>B. loranthoides</i></b>  |                           |                      |                     |                             |
| leaf                           | 97.05%                    | 82.08%               | 88.35%              | 2.95%                       |
| stem                           | 96.18%                    | 82.54%               | 87.80%              | 3.82%                       |
| <b><i>B. masoniana</i></b>     |                           |                      |                     |                             |
| leaf                           | 98.66%                    | 68.29%               | 74.12%              | 1.34%                       |
| male_flower                    | 98.76%                    | 62.74%               | 78.01%              | 1.24%                       |
| female_flower                  | 98.83%                    | 56.31%               | 76.89%              | 1.17%                       |
| <b><i>B.darthvaderiana</i></b> |                           |                      |                     |                             |
| root                           | 90.92%                    | 70.59%               | 73.22%              | 9.08%                       |
| stem                           | 93.80%                    | 74.49%               | 77.61%              | 6.20%                       |
| leaf                           | 98.79%                    | 69.62%               | 79.89%              | 1.21%                       |
| <b><i>B. peltatifolia</i></b>  |                           |                      |                     |                             |
| root                           | 95.09%                    | 70.00%               | 81.98%              | 4.91%                       |
| rhizome                        | 97.94%                    | 81.31%               | 93.65%              | 2.06%                       |
| leaf                           | 98.30%                    | 82.82%               | 92.64%              | 1.70%                       |
| peduncle                       | 96.57%                    | 81.35%               | 91.71%              | 1.38%                       |
| female flower                  | 98.62%                    | 82.56%               | 94.67%              | 3.43%                       |

**Table S8 Repetitive elements in four *Begonia* genomes.** (See separate Excel file)



**Table S9 Summary of genomes information across 13 representative angiosperms.**  
(See separate Excel file)

**Table S10 Gene Ontology (GO) terms enrichment analysis of the expanded gene families of *Begonia*.**

| GO_ID      | GO_Term                                               | Adjusted<br>P value |
|------------|-------------------------------------------------------|---------------------|
| GO:0008270 | zinc ion binding                                      | 9.79E-222           |
| GO:0046914 | transition metal ion binding                          | 1.46E-123           |
| GO:0046872 | metal ion binding                                     | 3.54E-63            |
| GO:0043169 | cation binding                                        | 3.72E-60            |
| GO:0005488 | binding                                               | 2.60E-17            |
| GO:0043167 | ion binding                                           | 1.12E-12            |
| GO:0003676 | nucleic acid binding                                  | 6.11E-11            |
| GO:0005216 | ion channel activity                                  | 9.57E-10            |
| GO:0022838 | substrate-specific channel activity                   | 9.57E-10            |
| GO:0005515 | protein binding                                       | 1.04E-09            |
| GO:0015267 | channel activity                                      | 5.83E-08            |
| GO:0022803 | passive transmembrane transporter activity            | 5.83E-08            |
| GO:0003674 | molecular_function                                    | 0.000568681         |
| GO:0015075 | ion transmembrane transporter activity                | 0.001926018         |
| GO:0022891 | substrate-specific transmembrane transporter activity | 0.002634072         |
| GO:0022892 | substrate-specific transporter activity               | 0.004738534         |
| GO:0006811 | ion transport                                         | 0.023784422         |
| GO:0035556 | intracellular signal transduction                     | 0.02401377          |

**Table S11 Kyoto Encyclopedia of Genes and Genomes (KEGG) enrichment analysis of the expanded gene families of *Begonia*.**

| MapID    | MapTitle                                            | Adjusted P value |
|----------|-----------------------------------------------------|------------------|
| map00190 | Oxidative phosphorylation                           | 1.10E-286        |
| map04144 | Endocytosis                                         | 1.31E-96         |
| map00240 | Pyrimidine metabolism                               | 2.80E-44         |
| map00770 | Pantothenate and CoA biosynthesis                   | 8.33E-32         |
| map00410 | beta-Alanine metabolism                             | 1.50E-26         |
| map00020 | Citrate cycle (TCA cycle)                           | 2.14E-18         |
| map00010 | Glycolysis / Gluconeogenesis                        | 8.20E-18         |
| map01230 | Biosynthesis of amino acids                         | 1.06E-14         |
| map03018 | RNA degradation                                     | 1.17E-07         |
| map00400 | Phenylalanine, tyrosine and tryptophan biosynthesis | 1.83E-07         |
| map01200 | Carbon metabolism                                   | 1.04E-05         |
| map00052 | Galactose metabolism                                | 2.47E-04         |
| map00040 | Pentose and glucuronate interconversions            | 5.87E-04         |
| map00520 | Amino sugar and nucleotide sugar metabolism         | 1.24E-02         |

**Table S12 Number of genes in families related to defense in *Begonia* and other selected genomes.** Fields highlighted in orange and grey represented the families with expanding and contracting gene number significantly ( $P$ -value < 0.05).

| Type        | Gene         | Pfam_id | Blor | Bmas | Bdar | Bpel | Csat | Atha | Gmax | Osat | Vvin | <i>P</i> -value |
|-------------|--------------|---------|------|------|------|------|------|------|------|------|------|-----------------|
| TFs         | HSF          | PF00447 | 20   | 16   | 21   | 18   | 21   | 30   | 52   | 35   | 19   | 0.049574        |
|             | AP2          | PF00847 | 172  | 172  | 170  | 163  | 145  | 250  | 395  | 228  | 112  | 0.157184        |
|             | NAC          | PF01849 | 5    | 4    | 7    | 5    | 4    | 9    | 12   | 10   | 4    | 0.100848        |
|             | WRKY         | PF03106 | 95   | 88   | 89   | 94   | 67   | 165  | 215  | 206  | 70   | 0.087249        |
|             | CBF          | PF03914 | 4    | 2    | 3    | 3    | 4    | 3    | 6    | 3    | 2    | 0.237901        |
| LEA         | LEA-5        | PF00477 | 1    | 2    | 2    | 1    | 2    | 3    | 5    | 2    | 3    | 0.026106        |
|             | LEA-4        | PF02987 | 4    | 1    | 2    | 0    | 7    | 52   | 15   | 5    | 5    | 0.084851        |
|             | LEA-2        | PF03168 | 39   | 34   | 50   | 46   | 19   | 55   | 43   | 72   | 16   | 0.457927        |
|             | LEA-3        | PF03242 | 7    | 6    | 7    | 6    | 5    | 10   | 11   | 6    | 4    | 0.323251        |
|             | LEA-1        | PF03760 | 3    | 7    | 3    | 3    | 4    | 3    | 7    | 5    | 5    | 0.266129        |
|             | LEA-6        | PF10714 | 1    | 1    | 3    | 2    | 2    | 4    | 2    | 2    | 0    | 0.380983        |
| HSPs        | HSP20        | PF00011 | 23   | 20   | 22   | 19   | 36   | 30   | 82   | 40   | 41   | 0.027436        |
|             | HSP70        | PF00012 | 29   | 25   | 28   | 23   | 16   | 37   | 59   | 32   | 38   | 0.108492        |
|             | Cpn60        | PF00118 | 32   | 31   | 31   | 31   | 20   | 48   | 50   | 38   | 25   | 0.228086        |
|             | HSP90        | PF00183 | 6    | 8    | 7    | 7    | 7    | 12   | 25   | 10   | 15   | 0.046089        |
|             | DnaJ         | PF00226 | 89   | 78   | 84   | 80   | 71   | 196  | 191  | 131  | 69   | 0.075949        |
| Antioxidant | GST          | PF00043 | 10   | 12   | 16   | 11   | 24   | 33   | 55   | 60   | 39   | 0.005104        |
|             | Sod_Cu       | PF00080 | 6    | 8    | 7    | 6    | 6    | 8    | 7    | 8    | 8    | 0.167778        |
|             | CAT/Catalase | PF00199 | 2    | 3    | 4    | 4    | 5    | 10   | 4    | 3    | 3    | 0.131495        |
|             | GPX/GSHPx    | PF00255 | 6    | 9    | 12   | 8    | 7    | 11   | 16   | 5    | 5    | 0.492176        |
|             | PRX          | PF10417 | 1    | 3    | 5    | 3    | 2    | 3    | 5    | 3    | 4    | 0.347171        |

|                   |                       |         |     |     |     |     |     |      |      |      |     |          |
|-------------------|-----------------------|---------|-----|-----|-----|-----|-----|------|------|------|-----|----------|
| Autophagy         | ATG8                  | PF02991 | 8   | 8   | 7   | 8   | 5   | 17   | 13   | 9    | 6   | 0.186309 |
|                   | APG5                  | PF04106 | 1   | 1   | 2   | 1   | 2   | 1    | 2    | 1    | 1   | 0.340728 |
|                   | APG17                 | PF04108 | 4   | 4   | 2   | 2   | 1   | 1    | 0    | 1    | 1   | 0.012839 |
|                   | APG9                  | PF04109 | 1   | 1   | 1   | 1   | 2   | 1    | 4    | 2    | 1   | 0.070964 |
|                   | APG12                 | PF04110 | 1   | 0   | 1   | 1   | 1   | 6    | 2    | 1    | 1   | 0.106573 |
|                   | APG6                  | PF04111 | 1   | 0   | 1   | 1   | 1   | 4    | 2    | 4    | 1   | 0.035458 |
|                   | ATG16                 | PF08614 | 2   | 1   | 1   | 1   | 1   | 1    | 2    | 1    | 1   | 0.44044  |
|                   | ATG_C                 | PF09333 | 1   | 1   | 2   | 1   | 1   | 3    | 2    | 1    | 1   | 0.242155 |
|                   | ATG27                 | PF09451 | 1   | 1   | 1   | 1   | 0   | 3    | 2    | 2    | 1   | 0.152279 |
|                   | ATG13                 | PF10033 | 2   | 3   | 2   | 2   | 1   | 4    | 6    | 3    | 1   | 0.241179 |
|                   | ATG14                 | PF10186 | 2   | 2   | 1   | 1   | 1   | 6    | 2    | 2    | 1   | 0.199362 |
|                   | ATG11                 | PF10377 | 2   | 1   | 0   | 1   | 1   | 1    | 2    | 1    | 2   | 0.219359 |
|                   | ATG3                  | PF10381 | 1   | 0   | 1   | 1   | 1   | 1    | 2    | 3    | 1   | 0.059165 |
|                   | ATG2_CAD              | PF13329 | 1   | 0   | 2   | 1   | 0   | 3    | 2    | 1    | 0   | 0.393587 |
| Biotic stress     | P450                  | PF00067 | 237 | 158 | 186 | 151 | 195 | 368  | 464  | 385  | 414 | 0.006337 |
|                   | Lyase_aromatic        | PF00221 | 4   | 5   | 6   | 5   | 12  | 5    | 8    | 10   | 30  | 0.07179  |
|                   | Bet V 1               | PF00407 | 32  | 43  | 44  | 17  | 42  | 47   | 47   | 8    | 31  | 0.460287 |
|                   | NB-ARC                | PF00931 | 0   | 0   | 0   | 0   | 0   | 0    | 0    | 0    | 0   | -        |
|                   | TIR                   | PF01582 | 1   | 1   | 0   | 1   | 23  | 314  | 218  | 3    | 32  | 0.066891 |
|                   | M1o                   | PF03094 | 28  | 23  | 26  | 23  | 22  | 35   | 46   | 22   | 21  | 0.225183 |
|                   | Terpene_synth_C       | PF03936 | 46  | 18  | 20  | 15  | 27  | 52   | 37   | 69   | 83  | 0.027708 |
| drought tolerance | BBE                   | PF08031 | 14  | 21  | 14  | 11  | 6   | 33   | 49   | 12   | 16  | 0.181996 |
|                   | Protein kinase domain | PF00069 | 629 | 532 | 545 | 539 | 530 | 1359 | 1418 | 1549 | 634 | 0.032709 |
|                   | Dehydrin              | PF00257 | 7   | 5   | 7   | 4   | 5   | 16   | 6    | 8    | 2   | 0.267837 |

|                                            |         |     |     |     |     |     |     |     |     |     |          |
|--------------------------------------------|---------|-----|-----|-----|-----|-----|-----|-----|-----|-----|----------|
| CBS domain containing protein (DCPS)       | PF00571 | 54  | 53  | 65  | 60  | 42  | 75  | 97  | 114 | 38  | 0.184816 |
| Univeral stress protein family             | PF00582 | 42  | 39  | 38  | 37  | 31  | 73  | 70  | 61  | 32  | 0.095746 |
| BTB/POZ domain                             | PF00651 | 49  | 37  | 41  | 47  | 33  | 116 | 99  | 155 | 41  | 0.060388 |
| Sodium/hydrogen exchanger family           | PF00999 | 38  | 34  | 37  | 39  | 36  | 60  | 68  | 34  | 32  | 0.148646 |
| NAD dependent epimerase/dehydratase family | PF01370 | 37  | 34  | 45  | 36  | 31  | 60  | 72  | 80  | 59  | 0.02629  |
| GatB domain                                | PF02637 | 1   | 1   | 2   | 1   | 2   | 3   | 2   | 2   | 2   | 0.012106 |
| Thioesterase superfamily /4HBT             | PF03061 | 4   | 6   | 5   | 5   | 9   | 15  | 17  | 12  | 10  | 0.00288  |
| C1 domain                                  | PF03107 | 26  | 127 | 163 | 56  | 50  | 872 | 32  | 31  | 15  | 0.281684 |
| Nop14-like family                          | PF04147 | 1   | 1   | 1   | 1   | 1   | 2   | 3   | 3   | 1   | 0.044505 |
| Phosphoesterase family                     | PF04185 | 6   | 8   | 6   | 6   | 5   | 7   | 9   | 5   | 6   | 0.457413 |
| U-box domain                               | PF04564 | 66  | 62  | 61  | 56  | 51  | 97  | 126 | 101 | 48  | 0.099756 |
| hAT family dimerisation domain             | PF05699 | 34  | 13  | 9   | 5   | 1   | 34  | 199 | 90  | 9   | 0.117547 |
| Protein tyrosine                           | PF07714 | 262 | 245 | 221 | 217 | 290 | 766 | 997 | 744 | 497 | 0.012553 |

|        |                                |         |     |    |    |    |    |     |     |     |     |          |
|--------|--------------------------------|---------|-----|----|----|----|----|-----|-----|-----|-----|----------|
|        | kinase                         |         |     |    |    |    |    |     |     |     |     |          |
|        | WRC                            | PF08879 | 22  | 20 | 15 | 18 | 11 | 23  | 37  | 29  | 18  | 0.17583  |
|        | QLQ                            | PF08880 | 16  | 11 | 12 | 14 | 8  | 20  | 28  | 20  | 9   | 0.193223 |
| Others | Multicopper oxidase/Cu-oxidase | PF00394 | 30  | 31 | 30 | 29 | 35 | 63  | 97  | 52  | 65  | 0.016574 |
|        | ACBP                           | PF00887 | 4   | 4  | 3  | 7  | 4  | 16  | 11  | 7   | 6   | 0.058907 |
|        | MATE                           | PF01554 | 117 | 84 | 83 | 83 | 70 | 183 | 218 | 205 | 125 | 0.033405 |
|        | COBRA                          | PF04833 | 11  | 10 | 10 | 11 | 10 | 18  | 24  | 13  | 11  | 0.072316 |
|        | EDR1                           | PF14381 | 15  | 8  | 8  | 10 | 8  | 20  | 26  | 18  | 9   | 0.085159 |
|        | ABC_trans_N                    | PF14510 | 14  | 10 | 9  | 11 | 13 | 31  | 27  | 27  | 27  | 0.004101 |

Abbreviations: TFs = Transcription factors; LEA = Late Embryogenesis Abundant protein; HSPs = Heat shock proteins; Blor = *B. loranthoides*; Bmas = *B. masoniana*; Bdar = *B. darthvaderiana*; Csat = *Cucumis sativus*; Atha = *Arabidopsis thaliana*; Gmax = *Glycine max*; Osat = *Oryza sativa*; Vvin = *Vitis vinifera*.



**Table S13 Statistics and annotations of the contracted gene families in *Begonia*.**  
(See separate Excel file)

**Table S14 The significantly enriched GO terms of biological processes for genes with TE inserting in introns across four *Begonia* species.**

| <b>GO_ID</b>                    | <b>GO_Term</b>                                      | <b>P-value</b> |
|---------------------------------|-----------------------------------------------------|----------------|
| <b><i>B. loranthoides</i></b>   |                                                     |                |
| GO:0098656                      | anion transmembrane transport                       | 0.0127         |
| GO:0003333                      | amino acid transmembrane transport                  | 0.0152         |
| GO:1903825                      | organic acid transmembrane transport                | 0.0152         |
| GO:1905039                      | carboxylic acid transmembrane transport             | 0.0152         |
| GO:0015977                      | carbon fixation                                     | 0.0418         |
| GO:0010112                      | regulation of systemic acquired resistance          | 0.0424         |
| GO:0002376                      | immune system process                               | 0.0424         |
| GO:0002682                      | regulation of immune system process                 | 0.0424         |
| GO:0002831                      | regulation of response to biotic stimulus           | 0.0424         |
| GO:0006955                      | immune response                                     | 0.0424         |
| GO:0009627                      | systemic acquired resistance                        | 0.0424         |
| GO:0009814                      | defense response, incompatible interaction          | 0.0424         |
| GO:0031347                      | regulation of defense response                      | 0.0424         |
| GO:0032101                      | regulation of response to external stimulus         | 0.0424         |
| GO:0043900                      | regulation of multi-organism process                | 0.0424         |
| GO:0045087                      | innate immune response                              | 0.0424         |
| GO:0045088                      | regulation of innate immune response                | 0.0424         |
| GO:0050776                      | regulation of immune response                       | 0.0424         |
| GO:0080134                      | regulation of response to stress                    | 0.0424         |
| <b><i>B. masoniana</i></b>      |                                                     |                |
| GO:0009607                      | response to biotic stimulus                         | 0.0000         |
| GO:0006950                      | response to stress                                  | 0.0001         |
| GO:0006952                      | defense response                                    | 0.0006         |
| GO:0006415                      | translational termination                           | 0.0025         |
| GO:0022411                      | cellular component disassembly                      | 0.0026         |
| GO:0032984                      | macromolecular complex disassembly                  | 0.0026         |
| GO:0043241                      | protein complex disassembly                         | 0.0026         |
| GO:0043624                      | cellular protein complex disassembly                | 0.0026         |
| GO:0071822                      | protein complex subunit organization                | 0.0075         |
| GO:0050896                      | response to stimulus                                | 0.0142         |
| <b><i>B. darthvaderiana</i></b> |                                                     |                |
| GO:0055114                      | oxidation-reduction process                         | 0.0000         |
| GO:0009772                      | photosynthetic electron transport in photosystem II | 0.0000         |
| GO:0009767                      | photosynthetic electron transport chain             | 0.0000         |
| GO:0019684                      | photosynthesis, light reaction                      | 0.0000         |
| GO:0022900                      | electron transport chain                            | 0.0000         |
| GO:0060249                      | anatomical structure homeostasis                    | 0.0000         |
| GO:0044699                      | single-organism process                             | 0.0014         |
| GO:0001101                      | response to acid chemical                           | 0.0108         |

|                               |                                                            |        |
|-------------------------------|------------------------------------------------------------|--------|
| GO:1901700                    | response to oxygen-containing compound                     | 0.0108 |
| GO:0051603                    | proteolysis involved in cellular protein catabolic process | 0.0183 |
| GO:0044257                    | cellular protein catabolic process                         | 0.0183 |
| GO:0031047                    | gene silencing by RNA                                      | 0.0199 |
| GO:0016458                    | gene silencing                                             | 0.0199 |
| GO:0030163                    | protein catabolic process                                  | 0.0213 |
| GO:0010035                    | response to inorganic substance                            | 0.0221 |
| GO:0009415                    | response to water                                          | 0.0252 |
| GO:0051276                    | chromosome organization                                    | 0.0310 |
| GO:0009057                    | macromolecule catabolic process                            | 0.0316 |
| GO:0044265                    | cellular macromolecule catabolic process                   | 0.0316 |
| GO:0009892                    | negative regulation of metabolic process                   | 0.0325 |
| GO:0010605                    | negative regulation of macromolecule metabolic process     | 0.0325 |
| GO:0010629                    | negative regulation of gene expression                     | 0.0325 |
| <b><i>B. peltatifolia</i></b> |                                                            |        |
| GO:0006298                    | mismatch repair                                            | 0.0020 |
| GO:0006413                    | translational initiation                                   | 0.0153 |
| GO:0009415                    | response to water                                          | 0.0170 |
| GO:0006259                    | DNA metabolic process                                      | 0.0226 |
| GO:1901700                    | response to oxygen-containing compound                     | 0.0237 |
| GO:0006950                    | response to stress                                         | 0.0281 |
| GO:0010035                    | response to inorganic substance                            | 0.0298 |
| GO:0009628                    | response to abiotic stimulus                               | 0.0366 |

**Table S15 The significantly enriched GO terms of biological processes for genes with TEs inserting in promoter across four *Begonia* species.**

| <b>GO_ID</b>                    | <b>GO_Term</b>                                                     | <b>P-value</b> |
|---------------------------------|--------------------------------------------------------------------|----------------|
| <b><i>B. loranthoides</i></b>   |                                                                    |                |
| GO:0015979                      | photosynthesis                                                     | 2.06E-07       |
| GO:0009767                      | photosynthetic electron transport chain                            | 0.0002         |
| GO:0009772                      | photosynthetic electron transport in photosystem II                | 0.0002         |
| GO:0019684                      | photosynthesis, light reaction                                     | 0.0006         |
| GO:0017148                      | negative regulation of translation                                 | 0.0022         |
| GO:0034249                      | negative regulation of cellular amide metabolic process            | 0.0022         |
| GO:0032269                      | negative regulation of cellular protein metabolic process          | 0.0056         |
| GO:0051248                      | negative regulation of protein metabolic process                   | 0.0056         |
| GO:0022900                      | electron transport chain                                           | 0.0082         |
| GO:0009890                      | negative regulation of biosynthetic process                        | 0.0331         |
| GO:0010558                      | negative regulation of macromolecule biosynthetic process          | 0.0331         |
| GO:0031327                      | negative regulation of cellular biosynthetic process               | 0.0331         |
| GO:0051172                      | negative regulation of nitrogen compound metabolic process         | 0.0331         |
| GO:2000113                      | negative regulation of cellular macromolecule biosynthetic process | 0.0331         |
| GO:0031324                      | negative regulation of cellular metabolic process                  | 0.0494         |
| <b><i>B. masoniana</i></b>      |                                                                    |                |
| GO:0015074                      | DNA integration                                                    | 2.79E-05       |
| GO:0009607                      | response to biotic stimulus                                        | 2.79E-05       |
| GO:0006952                      | defense response                                                   | 0.0013         |
| GO:0006950                      | response to stress                                                 | 0.0210         |
| GO:0006415                      | translational termination                                          | 0.0210         |
| GO:0022411                      | cellular component disassembly                                     | 0.0222         |
| GO:0032984                      | macromolecular complex disassembly                                 | 0.0222         |
| GO:0043241                      | protein complex disassembly                                        | 0.0222         |
| GO:0043624                      | cellular protein complex disassembly                               | 0.0222         |
| GO:0009772                      | photosynthetic electron transport in photosystem II                | 0.0232         |
| GO:0009767                      | photosynthetic electron transport chain                            | 0.0266         |
| GO:0006808                      | regulation of nitrogen utilization                                 | 0.0266         |
| GO:0017148                      | negative regulation of translation                                 | 0.0266         |
| GO:0019740                      | nitrogen utilization                                               | 0.0266         |
| GO:0034249                      | negative regulation of cellular amide metabolic process            | 0.0266         |
| <b><i>B. darthvaderiana</i></b> |                                                                    |                |
| GO:0000723                      | telomere maintenance                                               | 3.69E-19       |
| GO:0032200                      | telomere organization                                              | 3.69E-19       |
| GO:0060249                      | anatomical structure homeostasis                                   | 3.69E-19       |

|                               |                                                        |          |
|-------------------------------|--------------------------------------------------------|----------|
| GO:0009767                    | photosynthetic electron transport chain                | 3.98E-16 |
| GO:0009772                    | photosynthetic electron transport in photosystem II    | 3.81E-14 |
| GO:0019684                    | photosynthesis, light reaction                         | 1.40E-13 |
| GO:0006259                    | DNA metabolic process                                  | 7.71E-13 |
| GO:0022900                    | electron transport chain                               | 2.36E-11 |
| GO:0015979                    | photosynthesis                                         | 1.35E-07 |
| GO:0051276                    | chromosome organization                                | 3.46E-07 |
| GO:0006281                    | DNA repair                                             | 7.80E-07 |
| GO:0006974                    | cellular response to DNA damage stimulus               | 1.21E-06 |
| GO:0033554                    | cellular response to stress                            | 1.51E-06 |
| GO:0006091                    | generation of precursor metabolites and energy         | 1.91E-06 |
| GO:0051716                    | cellular response to stimulus                          | 2.41E-06 |
| GO:0006996                    | organelle organization                                 | 3.48E-06 |
| GO:0015074                    | DNA integration                                        | 6.78E-06 |
| GO:0042592                    | homeostatic process                                    | 6.96E-06 |
| GO:0055114                    | oxidation-reduction process                            | 1.60E-05 |
| GO:0065008                    | regulation of biological quality                       | 0.0002   |
| GO:0006950                    | response to stress                                     | 0.0007   |
| GO:0050896                    | response to stimulus                                   | 0.0222   |
| GO:0009892                    | negative regulation of metabolic process               | 0.0284   |
| GO:0010605                    | negative regulation of macromolecule metabolic process | 0.0284   |
| GO:0010629                    | negative regulation of gene expression                 | 0.0284   |
| <b><i>B. peltatifolia</i></b> |                                                        |          |
| GO:0015074                    | DNA integration                                        | 5.23E-25 |
| GO:0006259                    | DNA metabolic process                                  | 9.23E-14 |
| GO:0006412                    | translation                                            | 4.93E-06 |
| GO:0043043                    | peptide biosynthetic process                           | 6.01E-06 |
| GO:0006518                    | peptide metabolic process                              | 9.83E-06 |
| GO:0043604                    | amide biosynthetic process                             | 1.09E-05 |
| GO:0043603                    | cellular amide metabolic process                       | 2.03E-05 |
| GO:0015979                    | photosynthesis                                         | 0.0002   |
| GO:0034641                    | cellular nitrogen compound metabolic process           | 0.0002   |
| GO:0006807                    | nitrogen compound metabolic process                    | 0.0006   |
| GO:1901566                    | organonitrogen compound biosynthetic process           | 0.0006   |
| GO:0009767                    | photosynthetic electron transport chain                | 0.0010   |
| GO:0043170                    | macromolecule metabolic process                        | 0.0026   |
| GO:0019684                    | photosynthesis, light reaction                         | 0.0035   |
| GO:0044237                    | cellular metabolic process                             | 0.0074   |
| GO:0006298                    | mismatch repair                                        | 0.0095   |
| GO:1901564                    | organonitrogen compound metabolic process              | 0.0107   |
| GO:0044260                    | cellular macromolecule metabolic process               | 0.0242   |
| GO:0022900                    | electron transport chain                               | 0.0253   |
| GO:0035434                    | copper ion transmembrane transport                     | 0.0408   |
| GO:0006281                    | DNA repair                                             | 0.0452   |

**Table S16 Chlorophyll data of the sun loving plant *Gerbera hybrida* and four *Begonia* species.**

| Species                  | Content ( $\mu\text{g cm}^2$ ) |                  |                  |                 |
|--------------------------|--------------------------------|------------------|------------------|-----------------|
|                          | Chl a                          | Chl b            | Total Chl        | Chl a/b         |
| <i>Gerbera hybrida</i>   | 34.48 $\pm$ 2.60               | 11.08 $\pm$ 0.90 | 45.57 $\pm$ 3.50 | 3.11 $\pm$ 0.02 |
| <i>B. loranthoides</i>   | 27.98 $\pm$ 1.90               | 10.30 $\pm$ 0.90 | 38.28 $\pm$ 2.78 | 2.72 $\pm$ 0.08 |
| <i>B. peltatifolia</i>   | 26.70 $\pm$ 5.92               | 9.89 $\pm$ 2.80  | 36.59 $\pm$ 8.72 | 2.73 $\pm$ 0.16 |
| <i>B. masoniana</i>      | 17.60 $\pm$ 1.89               | 8.34 $\pm$ 0.89  | 25.95 $\pm$ 2.77 | 2.11 $\pm$ 0.03 |
| <i>B. darthvaderiana</i> | 19.23 $\pm$ 1.06               | 9.02 $\pm$ 0.95  | 28.24 $\pm$ 1.19 | 1.98 $\pm$ 0.03 |

Note: Values are means for three biological replicates ( $\pm$ SD).

**Table S17 Comparisons of the gene numbers for the light signaling genes in 10 angiosperm genomes.**

| <b>Gene</b>                                      | <b>Vvin</b> | <b>Mcha</b> | <b>Csat</b> | <b>Lsic</b> | <b>Clan</b> | <b>Atha</b> | <b>Blor</b> | <b>Bmas</b> | <b>Bdar</b> | <b>Bpel</b> |
|--------------------------------------------------|-------------|-------------|-------------|-------------|-------------|-------------|-------------|-------------|-------------|-------------|
| <b>&gt;Blue light and UV-A signaling pathway</b> |             |             |             |             |             |             |             |             |             |             |
| Cryptochromes (CRY1/2)                           | 2           | 2           | 1           | 1           | 2           | 2           | 4           | 3           | 4           | 4           |
| Cullin 4 (CUL4)                                  | 1           | 1           | 1           | 1           | 1           | 1           | 4           | 2           | 2           | 2           |
| CONSTITUTIVELY<br>PHOTOMORPHOGENIC1 (COP1)       | 2           | 2           | 3           | 2           | 2           | 1           | 3           | 2           | 1           | 2           |
| COP9 signalosome (CSN)                           | 1           | 1           | 1           | 2           | 1           | 1           | 2           | 2           | 3           | 2           |
| CONSTITUTIVE<br>PHOTOMORPHOGENIC 10 (COP10)      | 0           | 1           | 0           | 0           | 1           | 1           | 0           | 1           | 1           | 1           |
| DE-ETIOLATED 1 (DET1)                            | 1           | 1           | 0           | 1           | 1           | 1           | 1           | 0           | 2           | 0           |
| DNA-damage-binding protein 1 (DDB1)              | 1           | 0           | 1           | 1           | 1           | 1           | 1           | 1           | 1           | 1           |
| <b>&gt;UV-B signaling pathway</b>                |             |             |             |             |             |             |             |             |             |             |
| UV Resistance Locus 8 (UVR8)                     | 1           | 1           | 1           | 1           | 1           | 1           | 2           | 2           | 3           | 2           |
| SUPPRESSOR OF PHYAs (SPAs)                       | 7           | 2           | 3           | 2           | 3           | 4           | 3           | 4           | 5           | 4           |
| ELONGATED HYPOCOTYL 5 (HY5)                      | 2           | 2           | 1           | 2           | 2           | 2           | 3           | 2           | 2           | 2           |
| <b>&gt;Red/Far-red light signaling pathway</b>   |             |             |             |             |             |             |             |             |             |             |
| Phytochromes (PHAs)                              | 1           | 1           | 2           | 2           | 2           | 1           | 1           | 1           | 1           | 1           |
| Phytochromes (PHYB/C/D/E)                        | 3           | 2           | 2           | 3           | 4           | 4           | 6           | 5           | 5           | 5           |
| PHYTOCHROME INTERACTING<br>FACTORS (PIFs)        | 5           | 8           | 8           | 7           | 5           | 7           | 9           | 7           | 9           | 6           |



|                                                                                  |    |    |    |    |    |    |    |    |    |    |
|----------------------------------------------------------------------------------|----|----|----|----|----|----|----|----|----|----|
| ETHYLENE INSENSITIVE3/EIN3-LIKE1<br>(EIN3/EIL1)                                  | 2  | 4  | 4  | 4  | 4  | 4  | 3  | 4  | 4  | 4  |
| <b>&gt;Seeding emergence signaling pathway</b>                                   |    |    |    |    |    |    |    |    |    |    |
| EIN3-BINDING F-BOX1 and 2 (EBF1/2)                                               | 3  | 5  | 4  | 6  | 4  | 2  | 6  | 4  | 4  | 3  |
| FAR-RED ELONGATED HYPOCOTYL<br>1/ FHY1-LIKE (FHY1/FHL)                           | 1  | 2  | 2  | 1  | 2  | 2  | 1  | 1  | 1  | 1  |
| <b>&gt;PHYA nuclear transfer feedback loop</b>                                   |    |    |    |    |    |    |    |    |    |    |
| FAR-RED ELONGATED<br>HYPOCOTYLS3 &<br>FAR-RED-IMPAIRED RESPONSE1<br>( FHY3&FAR1) | 5  | 3  | 2  | 3  | 2  | 2  | 2  | 1  | 2  | 1  |
| <b>&gt;others</b>                                                                |    |    |    |    |    |    |    |    |    |    |
| LONG AFTER FAR-RED RADIATION1<br>(LAF1)                                          | 3  | 1  | 3  | 2  | 2  | 1  | 1  | 0  | 0  | 2  |
| Phototropins (PHOT1/2)                                                           | 2  | 3  | 3  | 3  | 3  | 2  | 5  | 5  | 5  | 5  |
| GA 20-oxidase (GA20ox)                                                           | 8  | 10 | 8  | 9  | 8  | 5  | 7  | 5  | 5  | 7  |
| Homo-box 2/4 (HB2/4)                                                             | 2  | 1  | 2  | 1  | 1  | 2  | 2  | 2  | 0  | 2  |
| YUCs                                                                             | 11 | 10 | 10 | 11 | 11 | 11 | 13 | 14 | 11 | 15 |
| DELLA                                                                            | 7  | 3  | 5  | 6  | 8  | 5  | 10 | 11 | 11 | 10 |

Abbreviation: Vvin, *Vitis vinifera*; Mcha, *Momordica charantia*; Cast, *Cucumis sativus*; Lsic, *Lagenaria siceraria*; Clan, *Citrullus lanatus*; Atha, *Arabidopsis thaliana*; Blor, *B. loranthoides*; Bmas, *B. masoniana*; Bdar, *B. darthvaderiana*; Bpel, *B. peltatifolia*.

**Table S18 Comparisons of the gene numbers of the light-harvesting chlorophyll a/b-binding proteins (LHCs) family genes in the seven genomes of *Begonia* and other angiosperms.**

| LHC family | Bmas      | Bdar      | Blor      | Bpel      | Csat      | Atha      | Osat      |
|------------|-----------|-----------|-----------|-----------|-----------|-----------|-----------|
| LHCA total | <b>9</b>  | <b>9</b>  | <b>11</b> | <b>8</b>  | <b>6</b>  | <b>7</b>  | <b>6</b>  |
| LHCA1      | 2         | 2         | 2         | 2         | 1         | 1         | 1         |
| LHCA2      | 3         | 3         | 2         | 2         | 0         | 2         | 1         |
| LHCA3      | 1         | 2         | 2         | 2         | 1         | 1         | 1         |
| LHCA4      | 3         | 2         | 3         | 2         | 2         | 1         | 1         |
| LHCA5      | 0         | 0         | 1         | 0         | 1         | 1         | 1         |
| LHCA6      | 0         | 0         | 1         | 0         | 1         | 1         | 1         |
| LHCB total | <b>24</b> | <b>23</b> | <b>16</b> | <b>13</b> | <b>10</b> | <b>15</b> | <b>9</b>  |
| LHCB1      | 11        | 10        | 6         | 4         | 4         | 5         | 3         |
| LHCB2      | 2         | 3         | 2         | 2         | 1         | 3         | 1         |
| LHCB3      | 2         | 2         | 2         | 1         | 1         | 1         | 1         |
| LHCB4      | 3         | 3         | 2         | 2         | 1         | 3         | 1         |
| LHCB5      | 2         | 1         | 1         | 1         | 1         | 1         | 1         |
| LHCB6      | 3         | 4         | 2         | 2         | 1         | 1         | 1         |
| Chlab      | 1         | 0         | 1         | 1         | 1         | 1         | 1         |
| Total      | <b>33</b> | <b>32</b> | <b>27</b> | <b>21</b> | <b>16</b> | <b>22</b> | <b>15</b> |

Abbreviation: Bmas, *B. masoniana*; Bdar, *B. darthvaderiana*; Bpel, *B. peltatifolia*; Blor, *B. loranthoides*; Cast, *C. sativus*; Atha, *A. thaliana*; Osat, *O. sativa*.
